# Supplementary material for: Efficient generation of marmoset primordial germ cell-like cells using induced pluripotent stem cells
Source: eLife. 2023 Jan 31;12:e82263. doi: 10.7554/eLife.82263 (PMC9937652; doi:10.7554/eLife.82263)
Supplement: Figure 2—source data 1. [file elife-82263-fig2-data1.xlsx]

## Sheet: Sheet1
Figure 2–Source Data 1. Differentially expressed genes (DEGs) among cell clusters in Figure 2B
p_val : p_val (unadjusted)
avg_log2FC : log fold-change of the average expression between the two groups. Positive values indicate that the feature is more highly expressed in the first group.
pct.1 : The percentage of cells where the feature is detected in the first group (current cell cluster)
pct.2 : The percentage of cells where the feature is detected in the second group (all the remaining cell clusters)
p_val_adj : Adjusted p-value, based on Bonferroni correction using all features in the dataset.
gene	p_val	avg_log2FC	pct.1	pct.2	p_val_adj	cluster
PCP4	0	2.49616	0.381	0.08	0	Cardiogenic.mesoderm
CST3	0	2.43904	0.954	0.858	0	Cardiogenic.mesoderm
COL1A1	0	1.91217	0.659	0.228	0	Cardiogenic.mesoderm
SFRP1	0	1.61356	0.969	0.707	0	Cardiogenic.mesoderm
PRRX1	0	1.57029	0.646	0.155	0	Cardiogenic.mesoderm
HAND2	0	1.44205	0.552	0.086	0	Cardiogenic.mesoderm
PITX1	0	1.43617	0.444	0.066	0	Cardiogenic.mesoderm
COL3A1	0	1.3988	0.752	0.321	0	Cardiogenic.mesoderm
TWIST1	0	1.3758	0.778	0.273	0	Cardiogenic.mesoderm
IGFBP3	0	1.33972	0.269	0.118	0	Cardiogenic.mesoderm
MATN2	0	1.30748	0.533	0.234	0	Cardiogenic.mesoderm
FN1	0	1.30594	0.974	0.848	0	Cardiogenic.mesoderm
LGALS1	0	1.28156	0.873	0.574	0	Cardiogenic.mesoderm
MME	0	1.27455	0.774	0.405	0	Cardiogenic.mesoderm
GATA6	0	1.26895	0.467	0.109	0	Cardiogenic.mesoderm
COL1A2	0	1.2436	0.886	0.524	0	Cardiogenic.mesoderm
PITX2	0	1.22248	0.403	0.095	0	Cardiogenic.mesoderm
COL6A3	0	1.16109	0.592	0.246	0	Cardiogenic.mesoderm
COL6A2	0	1.15858	0.453	0.143	0	Cardiogenic.mesoderm
NTRK2	0	1.15742	0.325	0.065	0	Cardiogenic.mesoderm
MFAP5	0	1.14747	0.388	0.155	0	Cardiogenic.mesoderm
UACA	0	1.13516	0.77	0.534	0	Cardiogenic.mesoderm
BAMBI	0	1.11725	0.472	0.166	0	Cardiogenic.mesoderm
HAND1	0	1.11183	0.716	0.226	0	Cardiogenic.mesoderm
LOC100392617	0	1.03448	0.392	0.205	0	Cardiogenic.mesoderm
RUNX1T1	0	1.02508	0.469	0.174	0	Cardiogenic.mesoderm
KRT19	0	1.00226	0.934	0.613	0	Cardiogenic.mesoderm
AHNAK	0	0.97153	0.865	0.513	0	Cardiogenic.mesoderm
DCN	0	0.971162	0.739	0.296	0	Cardiogenic.mesoderm
VIM	0	0.940791	1	0.905	0	Cardiogenic.mesoderm
NAV3	0	0.918637	0.262	0.041	0	Cardiogenic.mesoderm
COL6A1	0	0.917321	0.42	0.171	0	Cardiogenic.mesoderm
LRRC17	0	0.9065	0.414	0.086	0	Cardiogenic.mesoderm
S100A10	0	0.904929	0.659	0.373	0	Cardiogenic.mesoderm
SERPINF1	0	0.899242	0.825	0.448	0	Cardiogenic.mesoderm
PID1	0	0.896699	0.308	0.032	0	Cardiogenic.mesoderm
BMP5	0	0.879741	0.378	0.064	0	Cardiogenic.mesoderm
SOX6	0	0.872471	0.391	0.18	0	Cardiogenic.mesoderm
POSTN	0	0.869605	0.693	0.338	0	Cardiogenic.mesoderm
PPIC	0	0.856988	0.315	0.098	0	Cardiogenic.mesoderm
TBX3	0	0.845723	0.824	0.409	0	Cardiogenic.mesoderm
TGFB2	0	0.834835	0.266	0.099	0	Cardiogenic.mesoderm
PDGFRA	0	0.834038	0.87	0.502	0	Cardiogenic.mesoderm
KRT8	0	0.831342	0.907	0.57	0	Cardiogenic.mesoderm
GALNT1	0	0.791144	0.972	0.839	0	Cardiogenic.mesoderm
FBLN1	0	0.772421	0.983	0.866	0	Cardiogenic.mesoderm
FNDC5	0	0.762547	0.357	0.122	0	Cardiogenic.mesoderm
ZFHX4	6.01795e-198	0.752503	0.363	0.244	1.53259e-193	Cardiogenic.mesoderm
DKK2	0	0.736815	0.144	0.01	0	Cardiogenic.mesoderm
COX2	0.00051645	0.730749	0.996	0.998	1	Cardiogenic.mesoderm
ATP6	6.18531e-05	0.722979	0.998	0.999	1	Cardiogenic.mesoderm
UNC5C	0	0.72088	0.467	0.198	0	Cardiogenic.mesoderm
PCOLCE	0	0.717951	0.791	0.386	0	Cardiogenic.mesoderm
SCUBE3	0	0.692986	0.695	0.385	0	Cardiogenic.mesoderm
CDH11	0	0.685615	0.947	0.686	0	Cardiogenic.mesoderm
OLFML2B	0	0.683198	0.28	0.056	0	Cardiogenic.mesoderm
CTHRC1	0	0.678523	0.868	0.598	0	Cardiogenic.mesoderm
NID2	0	0.675938	0.496	0.22	0	Cardiogenic.mesoderm
MSX1	0	0.673641	0.65	0.319	0	Cardiogenic.mesoderm
ATF3	0	0.670049	0.274	0.122	0	Cardiogenic.mesoderm
SEMA3A	0	0.668275	0.418	0.24	0	Cardiogenic.mesoderm
ND1	5.82942e-08	0.656211	0.993	0.996	0.00148458	Cardiogenic.mesoderm
CSRP2	0	0.650776	0.931	0.744	0	Cardiogenic.mesoderm
EDNRA	0	0.647379	0.77	0.443	0	Cardiogenic.mesoderm
SFRP2	0	0.643526	0.815	0.581	0	Cardiogenic.mesoderm
LOC118146909	1.91735e-192	0.643228	0.951	0.915	4.88292e-188	Cardiogenic.mesoderm
LOC118151245	1.27787e-17	0.64224	0.989	0.992	3.25434e-13	Cardiogenic.mesoderm
ND4	5.78631e-12	0.641843	0.994	0.996	1.4736e-07	Cardiogenic.mesoderm
EFNB2	2.88292e-197	0.636417	0.558	0.421	7.34192e-193	Cardiogenic.mesoderm
TNNI1	0	0.623745	0.379	0.196	0	Cardiogenic.mesoderm
ANXA2	0	0.621735	0.788	0.5	0	Cardiogenic.mesoderm
CDK6	0	0.621416	0.965	0.834	0	Cardiogenic.mesoderm
ATP1B1	0	0.619191	0.627	0.409	0	Cardiogenic.mesoderm
ID2	0	0.617291	0.895	0.559	0	Cardiogenic.mesoderm
RSPO3	0	0.616637	0.797	0.471	0	Cardiogenic.mesoderm
BMP4	0	0.606376	0.396	0.181	0	Cardiogenic.mesoderm
PROM1	0	0.60522	0.407	0.234	0	Cardiogenic.mesoderm
PEG3	0	0.602919	0.999	0.925	0	Cardiogenic.mesoderm
LIX1	0	0.602546	0.4	0.149	0	Cardiogenic.mesoderm
SMOC2	5.91356e-226	0.598245	0.415	0.262	1.50601e-221	Cardiogenic.mesoderm
SNAI2	0	0.581217	0.406	0.181	0	Cardiogenic.mesoderm
ID1	0	0.576014	0.905	0.61	0	Cardiogenic.mesoderm
COL5A2	1.07439e-225	0.570523	0.66	0.499	2.73615e-221	Cardiogenic.mesoderm
MMP2	0	0.569297	0.975	0.867	0	Cardiogenic.mesoderm
IGF2	0	0.565271	0.998	0.847	0	Cardiogenic.mesoderm
PCDH17	0	0.55895	0.338	0.118	0	Cardiogenic.mesoderm
FILIP1	0	0.550747	0.21	0.056	0	Cardiogenic.mesoderm
MID1	0	0.54284	0.366	0.18	0	Cardiogenic.mesoderm
LOC118151249	8.19374e-08	0.541355	0.987	0.99	0.0020867	Cardiogenic.mesoderm
EPB41L5	0	0.526346	0.71	0.478	0	Cardiogenic.mesoderm
SPARC	0	0.52374	0.98	0.858	0	Cardiogenic.mesoderm
BNC2	0	0.519329	0.318	0.114	0	Cardiogenic.mesoderm
PTN	0	0.515646	0.986	0.837	0	Cardiogenic.mesoderm
ARHGAP10	0	0.511531	0.692	0.45	0	Cardiogenic.mesoderm
MAB21L2	0	0.511047	0.252	0.073	0	Cardiogenic.mesoderm
SMARCA1	0	0.508068	0.952	0.829	0	Cardiogenic.mesoderm
PTPRD	0	0.50593	0.777	0.555	0	Cardiogenic.mesoderm
LEF1	0	0.50591	0.905	0.701	0	Cardiogenic.mesoderm
ROR1	0	0.50365	0.314	0.094	0	Cardiogenic.mesoderm
CALD1	1.32496e-249	0.499478	0.972	0.854	3.37429e-245	Cardiogenic.mesoderm
MAP1B	3.97511e-182	0.4965	0.723	0.544	1.01234e-177	Cardiogenic.mesoderm
ALX4	0	0.494198	0.251	0.015	0	Cardiogenic.mesoderm
PPP3CA	0	0.490102	0.766	0.556	0	Cardiogenic.mesoderm
HEBP2	0	0.490062	0.57	0.385	0	Cardiogenic.mesoderm
FGFR2	0	0.485903	0.708	0.51	0	Cardiogenic.mesoderm
PLS3	8.91024e-102	0.485633	0.377	0.298	2.26917e-97	Cardiogenic.mesoderm
WNT2	0	0.479254	0.18	0.013	0	Cardiogenic.mesoderm
GSN	3.29752e-106	0.478822	0.254	0.168	8.3978e-102	Cardiogenic.mesoderm
TAGLN	3.53545e-193	0.478022	0.761	0.568	9.00372e-189	Cardiogenic.mesoderm
H1-5	1.14478e-154	0.472618	0.807	0.668	2.91542e-150	Cardiogenic.mesoderm
SEMA6D	0	0.471745	0.752	0.472	0	Cardiogenic.mesoderm
TWSG1	0	0.464574	0.657	0.453	0	Cardiogenic.mesoderm
CLMP	0	0.454857	0.719	0.452	0	Cardiogenic.mesoderm
EMILIN2	1.72957e-304	0.452354	0.384	0.212	4.40469e-300	Cardiogenic.mesoderm
ARHGAP42	0	0.452313	0.38	0.208	0	Cardiogenic.mesoderm
MRC2	0	0.44922	0.531	0.338	0	Cardiogenic.mesoderm
GCNT1	0	0.446904	0.297	0.103	0	Cardiogenic.mesoderm
EXT2	0	0.445348	0.382	0.213	0	Cardiogenic.mesoderm
HOXA13	0	0.444653	0.204	0.029	0	Cardiogenic.mesoderm
TGFBI	4.68239e-247	0.443549	0.319	0.171	1.19246e-242	Cardiogenic.mesoderm
GDF7	0	0.439312	0.175	0.03	0	Cardiogenic.mesoderm
CNTFR	8.4579e-254	0.436276	0.452	0.298	2.15397e-249	Cardiogenic.mesoderm
AMIGO2	0	0.433932	0.306	0.105	0	Cardiogenic.mesoderm
ELAPOR2	0	0.43353	0.227	0.039	0	Cardiogenic.mesoderm
GPX8	0	0.431461	0.812	0.588	0	Cardiogenic.mesoderm
COX1	9.30272e-15	0.427163	0.978	0.984	2.36912e-10	Cardiogenic.mesoderm
ADAMTS1	6.37613e-174	0.425914	0.302	0.181	1.62381e-169	Cardiogenic.mesoderm
ST6GALNAC3	7.86911e-250	0.424862	0.433	0.28	2.00403e-245	Cardiogenic.mesoderm
MDK	0	0.421586	1	0.954	0	Cardiogenic.mesoderm
SVEP1	0	0.421242	0.262	0.052	0	Cardiogenic.mesoderm
PCDH11X	0	0.420539	0.684	0.459	0	Cardiogenic.mesoderm
NRP1	0	0.4176	0.439	0.235	0	Cardiogenic.mesoderm
PPFIBP2	0	0.417046	0.238	0.065	0	Cardiogenic.mesoderm
PTGIS	0	0.416784	0.338	0.142	0	Cardiogenic.mesoderm
NDNF	5.6521e-295	0.416303	0.264	0.114	1.43942e-290	Cardiogenic.mesoderm
KRT18	0	0.415857	0.89	0.615	0	Cardiogenic.mesoderm
CGNL1	0	0.409109	0.371	0.183	0	Cardiogenic.mesoderm
PRRX2	0	0.406333	0.361	0.155	0	Cardiogenic.mesoderm
PKDCC	1.18219e-203	0.403237	0.368	0.229	3.01068e-199	Cardiogenic.mesoderm
ZFPM2	0	0.402713	0.217	0.049	0	Cardiogenic.mesoderm
TBX20	0	0.402676	0.188	0.021	0	Cardiogenic.mesoderm
CALB2	0	0.394029	0.287	0.093	0	Cardiogenic.mesoderm
ADM	0	0.393123	0.145	0.019	0	Cardiogenic.mesoderm
MYC	4.6025e-251	0.39245	0.335	0.184	1.17212e-246	Cardiogenic.mesoderm
FOSL2	0	0.389877	0.244	0.087	0	Cardiogenic.mesoderm
SCUBE1	0	0.389287	0.267	0.064	0	Cardiogenic.mesoderm
S1PR3	6.46727e-262	0.386621	0.328	0.171	1.64702e-257	Cardiogenic.mesoderm
CEP350	4.887e-88	0.38598	0.809	0.728	1.24457e-83	Cardiogenic.mesoderm
ND6	1.11309e-07	0.384284	0.919	0.913	0.0028347	Cardiogenic.mesoderm
GSTO1	1.98717e-211	0.38152	0.307	0.174	5.06072e-207	Cardiogenic.mesoderm
LUM	1.34927e-218	0.380193	0.19	0.075	3.4362e-214	Cardiogenic.mesoderm
SRPX	0	0.374358	0.253	0.073	0	Cardiogenic.mesoderm
HCFC1R1	1.3228e-220	0.373373	0.604	0.444	3.36877e-216	Cardiogenic.mesoderm
FBN1	1.56378e-260	0.373082	0.604	0.417	3.98249e-256	Cardiogenic.mesoderm
FBLN2	1.69557e-265	0.372901	0.251	0.111	4.3181e-261	Cardiogenic.mesoderm
G0S2	0	0.372466	0.214	0.062	0	Cardiogenic.mesoderm
BEX1	7.19196e-289	0.371788	0.977	0.857	1.83158e-284	Cardiogenic.mesoderm
TPM2	4.83379e-252	0.369358	0.34	0.184	1.23102e-247	Cardiogenic.mesoderm
CCN1	3.45078e-197	0.36865	0.714	0.528	8.78809e-193	Cardiogenic.mesoderm
HEPH	8.15492e-170	0.367631	0.366	0.244	2.07681e-165	Cardiogenic.mesoderm
FAT4	2.29079e-255	0.36647	0.299	0.149	5.83395e-251	Cardiogenic.mesoderm
PPP1R3B	1.7447e-260	0.357784	0.224	0.093	4.44322e-256	Cardiogenic.mesoderm
MYRF	0	0.357317	0.267	0.078	0	Cardiogenic.mesoderm
CD47	1.39866e-183	0.356742	0.369	0.235	3.56196e-179	Cardiogenic.mesoderm
LMCD1	0	0.356356	0.147	0.014	0	Cardiogenic.mesoderm
PALM2AKAP2	0	0.350201	0.847	0.62	0	Cardiogenic.mesoderm
NR0B1	0	0.347505	0.183	0.029	0	Cardiogenic.mesoderm
ST3GAL1	1.29974e-283	0.346201	0.302	0.145	3.31005e-279	Cardiogenic.mesoderm
CDKN1C	0	0.345231	0.887	0.634	0	Cardiogenic.mesoderm
EMILIN1	0	0.344608	0.281	0.099	0	Cardiogenic.mesoderm
MSX2	0	0.344404	0.304	0.126	0	Cardiogenic.mesoderm
LOC108588063	0	0.342985	0.182	0.015	0	Cardiogenic.mesoderm
MEIS2	4.70192e-298	0.342101	0.903	0.669	1.19744e-293	Cardiogenic.mesoderm
CTTNBP2	0	0.34156	0.796	0.591	0	Cardiogenic.mesoderm
GSTP1	1.15841e-287	0.340205	0.999	0.987	2.95012e-283	Cardiogenic.mesoderm
ENO3	1.27727e-298	0.340068	0.841	0.626	3.25281e-294	Cardiogenic.mesoderm
ENPP2	2.46167e-170	0.33951	0.366	0.231	6.26914e-166	Cardiogenic.mesoderm
VPS28	2.78999e-188	0.339416	0.907	0.782	7.10527e-184	Cardiogenic.mesoderm
NME4	1.51328e-261	0.336608	0.987	0.908	3.85387e-257	Cardiogenic.mesoderm
ISL1	0	0.336325	0.208	0.064	0	Cardiogenic.mesoderm
NPM1	1.77275e-278	0.336225	1	0.989	4.51466e-274	Cardiogenic.mesoderm
MYL7	0	0.335963	0.155	0.022	0	Cardiogenic.mesoderm
ADAMTS6	2.98198e-144	0.332571	0.327	0.216	7.5942e-140	Cardiogenic.mesoderm
TIMP1	3.53973e-260	0.331894	0.82	0.624	9.01463e-256	Cardiogenic.mesoderm
CHSY1	7.19475e-133	0.330801	0.531	0.421	1.83229e-128	Cardiogenic.mesoderm
ZFHX3	1.57888e-234	0.329803	0.782	0.598	4.02092e-230	Cardiogenic.mesoderm
RSPO2	0	0.329531	0.114	0.01	0	Cardiogenic.mesoderm
VTN	0	0.329496	0.858	0.608	0	Cardiogenic.mesoderm
FAM89A	5.06113e-243	0.329445	0.581	0.407	1.28892e-238	Cardiogenic.mesoderm
AEBP1	6.50371e-149	0.329098	0.374	0.256	1.6563e-144	Cardiogenic.mesoderm
SEPTIN7	1.19857e-196	0.325517	0.996	0.976	3.0524e-192	Cardiogenic.mesoderm
PODXL	1.6011e-215	0.324598	0.679	0.487	4.07751e-211	Cardiogenic.mesoderm
SLC8A1	6.22905e-154	0.324108	0.269	0.157	1.58635e-149	Cardiogenic.mesoderm
JAKMIP2	2.98188e-197	0.323215	0.345	0.205	7.59395e-193	Cardiogenic.mesoderm
PLEKHA5	2.11041e-197	0.322779	0.662	0.506	5.37457e-193	Cardiogenic.mesoderm
PDLIM7	4.74212e-224	0.322337	0.87	0.699	1.20768e-219	Cardiogenic.mesoderm
LOXL1	3.64138e-139	0.320813	0.401	0.288	9.2735e-135	Cardiogenic.mesoderm
COL11A1	0	0.320753	0.258	0.102	0	Cardiogenic.mesoderm
LOC100398205	5.31211e-85	0.320677	0.445	0.337	1.35284e-80	Cardiogenic.mesoderm
PTPN13	1.66149e-213	0.320458	0.699	0.521	4.23131e-209	Cardiogenic.mesoderm
SMAD9	0	0.320425	0.227	0.071	0	Cardiogenic.mesoderm
CEP126	3.18436e-154	0.320028	0.235	0.128	8.10961e-150	Cardiogenic.mesoderm
SLIT3	5.9398e-124	0.318535	0.273	0.17	1.51269e-119	Cardiogenic.mesoderm
BTBD3	1.5236e-86	0.317935	0.595	0.489	3.88014e-82	Cardiogenic.mesoderm
TRABD2B	0	0.317486	0.214	0.062	0	Cardiogenic.mesoderm
CNTNAP4	0	0.317421	0.218	0.062	0	Cardiogenic.mesoderm
LOC100401450	9.80481e-227	0.312203	0.831	0.658	2.49699e-222	Cardiogenic.mesoderm
CFDP1	1.97669e-294	0.311859	0.998	0.978	5.03403e-290	Cardiogenic.mesoderm
GFPT2	8.35875e-234	0.310501	0.21	0.089	2.12872e-229	Cardiogenic.mesoderm
ANGPTL2	6.94048e-190	0.30941	0.253	0.133	1.76753e-185	Cardiogenic.mesoderm
PLD5	0	0.307684	0.183	0.054	0	Cardiogenic.mesoderm
SIPA1L2	1.24273e-101	0.30749	0.487	0.381	3.16487e-97	Cardiogenic.mesoderm
PPP1R14A	3.09184e-205	0.306387	0.2	0.089	7.87399e-201	Cardiogenic.mesoderm
VLDLR	0	0.30626	0.199	0.063	0	Cardiogenic.mesoderm
EID1	1.43244e-198	0.305674	0.994	0.962	3.648e-194	Cardiogenic.mesoderm
TKT	1.0134e-267	0.304249	0.998	0.97	2.58083e-263	Cardiogenic.mesoderm
RYK	1.12478e-191	0.30404	0.826	0.678	2.86448e-187	Cardiogenic.mesoderm
GPC6	1.10546e-97	0.303119	0.402	0.315	2.81528e-93	Cardiogenic.mesoderm
PLAAT3	7.3275e-127	0.30212	0.494	0.378	1.86609e-122	Cardiogenic.mesoderm
ANGPT2	4.97018e-276	0.301334	0.132	0.033	1.26576e-271	Cardiogenic.mesoderm
SYNE1	2.92282e-202	0.301089	0.299	0.162	7.44354e-198	Cardiogenic.mesoderm
HUNK	1.58482e-150	0.299422	0.345	0.225	4.03606e-146	Cardiogenic.mesoderm
CLU	2.37683e-222	0.297726	0.954	0.808	6.05307e-218	Cardiogenic.mesoderm
SLC5A3	1.06164e-141	0.29734	0.864	0.731	2.70367e-137	Cardiogenic.mesoderm
SAMD11	0	0.293436	0.2	0.054	0	Cardiogenic.mesoderm
GOLIM4	6.39065e-158	0.293243	0.897	0.776	1.62751e-153	Cardiogenic.mesoderm
GPX7	1.74719e-239	0.292849	0.283	0.142	4.44956e-235	Cardiogenic.mesoderm
ENC1	8.63277e-08	0.292311	0.324	0.324	0.00219851	Cardiogenic.mesoderm
CNTLN	1.29479e-86	0.29178	0.389	0.304	3.29745e-82	Cardiogenic.mesoderm
LOC100412233	3.65768e-51	0.291461	0.34	0.287	9.31501e-47	Cardiogenic.mesoderm
RAI14	2.71363e-184	0.291305	0.784	0.622	6.91081e-180	Cardiogenic.mesoderm
CIBAR1	6.13002e-233	0.288019	0.676	0.498	1.56113e-228	Cardiogenic.mesoderm
ZNF503	1.32912e-172	0.28621	0.864	0.699	3.38488e-168	Cardiogenic.mesoderm
AP1S2	3.52794e-156	0.284972	0.896	0.759	8.9846e-152	Cardiogenic.mesoderm
MSRB3	2.7346e-186	0.284906	0.25	0.13	6.9642e-182	Cardiogenic.mesoderm
FREM1	1.28077e-120	0.284539	0.309	0.204	3.26173e-116	Cardiogenic.mesoderm
COL5A1	1.15838e-119	0.28439	0.268	0.168	2.95005e-115	Cardiogenic.mesoderm
PBX3	3.86677e-162	0.284347	0.26	0.147	9.8475e-158	Cardiogenic.mesoderm
COL21A1	5.259e-89	0.283257	0.127	0.065	1.33931e-84	Cardiogenic.mesoderm
DDR2	0	0.282696	0.199	0.038	0	Cardiogenic.mesoderm
EML4	1.75178e-154	0.28263	0.885	0.749	4.46127e-150	Cardiogenic.mesoderm
MYOF	1.38576e-206	0.281903	0.224	0.103	3.52911e-202	Cardiogenic.mesoderm
TBX5	0	0.281205	0.138	0.006	0	Cardiogenic.mesoderm
TXN	3.4178e-170	0.278928	0.993	0.965	8.70412e-166	Cardiogenic.mesoderm
IFT57	4.73869e-197	0.27875	0.689	0.521	1.2068e-192	Cardiogenic.mesoderm
PEG10	7.76273e-253	0.27872	0.974	0.866	1.97694e-248	Cardiogenic.mesoderm
LOC103795936	8.3749e-138	0.278001	0.597	0.44	2.13284e-133	Cardiogenic.mesoderm
TMEM98	1.02829e-197	0.276663	0.952	0.8	2.61876e-193	Cardiogenic.mesoderm
EMP3	6.75039e-78	0.276004	0.374	0.293	1.71912e-73	Cardiogenic.mesoderm
ITM2C	7.76628e-270	0.27569	0.849	0.629	1.97784e-265	Cardiogenic.mesoderm
MFAP2	1.1555e-212	0.27542	0.95	0.781	2.94271e-208	Cardiogenic.mesoderm
FAM110B	9.46891e-73	0.275115	0.35	0.271	2.41145e-68	Cardiogenic.mesoderm
SORCS1	5.42878e-125	0.273668	0.23	0.133	1.38255e-120	Cardiogenic.mesoderm
LOC110006321	2.99411e-69	0.272686	0.848	0.773	7.62509e-65	Cardiogenic.mesoderm
SKP2	4.44808e-187	0.271651	0.691	0.531	1.13279e-182	Cardiogenic.mesoderm
PARM1	3.3653e-271	0.271434	0.126	0.03	8.57042e-267	Cardiogenic.mesoderm
UCHL1	1.51859e-151	0.270345	0.566	0.421	3.86738e-147	Cardiogenic.mesoderm
SHROOM3	3.68876e-119	0.269983	0.326	0.222	9.39417e-115	Cardiogenic.mesoderm
HOXD9	5.29211e-159	0.269655	0.266	0.15	1.34774e-154	Cardiogenic.mesoderm
HOXA11	0	0.268962	0.162	0.039	0	Cardiogenic.mesoderm
BCL7C	1.83295e-209	0.268285	0.793	0.618	4.66797e-205	Cardiogenic.mesoderm
LOC100413948	2.83265e-107	0.267892	0.738	0.595	7.2139e-103	Cardiogenic.mesoderm
FLNA	9.24785e-124	0.26691	0.878	0.753	2.35515e-119	Cardiogenic.mesoderm
JUN	4.74199e-79	0.266778	0.848	0.738	1.20764e-74	Cardiogenic.mesoderm
CD248	2.67849e-229	0.266614	0.335	0.181	6.8213e-225	Cardiogenic.mesoderm
MRPS6	1.78414e-177	0.265944	0.878	0.729	4.54367e-173	Cardiogenic.mesoderm
DSE	2.74133e-158	0.263834	0.274	0.158	6.98135e-154	Cardiogenic.mesoderm
SERPINH1	2.19187e-125	0.263039	0.983	0.896	5.58203e-121	Cardiogenic.mesoderm
IL11RA	3.04312e-116	0.261764	0.291	0.193	7.74993e-112	Cardiogenic.mesoderm
PAPSS1	1.77109e-119	0.261182	0.859	0.744	4.51043e-115	Cardiogenic.mesoderm
TMSB15B	1.75571e-136	0.25932	1	0.953	4.47126e-132	Cardiogenic.mesoderm
PRDM6	0	0.258409	0.182	0.04	0	Cardiogenic.mesoderm
SNCAIP	3.57447e-107	0.258154	0.246	0.156	9.1031e-103	Cardiogenic.mesoderm
HES1	1.63999e-188	0.257803	0.698	0.506	4.17657e-184	Cardiogenic.mesoderm
SEPTIN11	2.89863e-203	0.256872	0.97	0.882	7.38194e-199	Cardiogenic.mesoderm
TNS1	1.41959e-178	0.256523	0.243	0.126	3.61526e-174	Cardiogenic.mesoderm
CREB3L1	5.13355e-175	0.256304	0.153	0.061	1.30736e-170	Cardiogenic.mesoderm
ND4L	2.41531e-25	0.255455	0.616	0.565	6.15106e-21	Cardiogenic.mesoderm
SH3GL3	5.80561e-283	0.254322	0.163	0.049	1.47851e-278	Cardiogenic.mesoderm
LOC108589016	5.93666e-126	0.253527	0.844	0.685	1.51189e-121	Cardiogenic.mesoderm
LY6E	6.51904e-108	0.252849	0.508	0.402	1.6602e-103	Cardiogenic.mesoderm
PRPH	9.91877e-294	0.252579	0.136	0.033	2.52601e-289	Cardiogenic.mesoderm
KIFAP3	7.84726e-149	0.252054	0.569	0.433	1.99846e-144	Cardiogenic.mesoderm
SAMHD1	7.66661e-164	0.251733	0.263	0.148	1.95246e-159	Cardiogenic.mesoderm
PDK1	2.58444e-115	0.25035	0.481	0.368	6.5818e-111	Cardiogenic.mesoderm
LOC100410611	0	10.1118	0.913	0.13	0	Red.blood.cells
LOC103787296	0	9.17335	1	0.337	0	Red.blood.cells
HBZ	0	8.48854	0.782	0.455	0	Red.blood.cells
LOC118142868	0	8.32261	0.981	0.11	0	Red.blood.cells
LOC100389093	0	6.57186	0.365	0.068	0	Red.blood.cells
LOC100388732	0	6.56162	0.363	0.059	0	Red.blood.cells
ALAS2	0	3.41228	0.774	0.014	0	Red.blood.cells
AHSP	0	2.89283	0.398	0.012	0	Red.blood.cells
CD52	0	2.02421	0.388	0.007	0	Red.blood.cells
SPTA1	0	1.96166	0.275	0.002	0	Red.blood.cells
SNCA	0	1.8722	0.475	0.042	0	Red.blood.cells
GYPA	0	1.44773	0.266	0.001	0	Red.blood.cells
DUOX1	0	1.43987	0.361	0.002	0	Red.blood.cells
HEMGN	0	1.39434	0.34	0.002	0	Red.blood.cells
MYL4	0	1.2947	0.268	0.059	0	Red.blood.cells
LOC100410976	0	0.966246	0.247	0.001	0	Red.blood.cells
SLC4A1	0	0.860193	0.246	0.001	0	Red.blood.cells
LOC100405484	0	0.799784	0.201	0.012	0	Red.blood.cells
LOC100896069	0	0.746039	0.246	0	0	Red.blood.cells
HBM	0	0.735834	0.24	0.001	0	Red.blood.cells
HBQ1	0	0.679624	0.285	0.008	0	Red.blood.cells
HHIPL1	0	0.65427	0.226	0.019	0	Red.blood.cells
TESC	0	0.614311	0.288	0.044	0	Red.blood.cells
RGCC	0	0.587788	0.236	0.032	0	Red.blood.cells
KLF1	0	0.574333	0.216	0.001	0	Red.blood.cells
TENT5C	0	0.556994	0.26	0.044	0	Red.blood.cells
RHAG	0	0.487035	0.208	0.021	0	Red.blood.cells
EPB42	0	0.469626	0.188	0.001	0	Red.blood.cells
RHCE	0	0.40456	0.199	0.002	0	Red.blood.cells
TMOD1	0	0.379434	0.187	0.006	0	Red.blood.cells
NFE2	0	0.355452	0.173	0.007	0	Red.blood.cells
LOC103793199	0	0.324693	0.151	0	0	Red.blood.cells
TUBB1	0	0.315456	0.155	0.01	0	Red.blood.cells
NMNAT3	0	0.308636	0.166	0.001	0	Red.blood.cells
REPS2	0	0.307717	0.152	0.008	0	Red.blood.cells
SPTB	0	0.297845	0.149	0.005	0	Red.blood.cells
GATA1	0	0.294193	0.147	0	0	Red.blood.cells
INHBB	0	0.279436	0.14	0.002	0	Red.blood.cells
ERMAP	0	0.277199	0.157	0.008	0	Red.blood.cells
MRAP	0	0.260233	0.145	0.002	0	Red.blood.cells
LOC103793184	0	0.252061	0.128	0	0	Red.blood.cells
XK	1.27715e-301	0.360866	0.194	0.03	3.25252e-297	Red.blood.cells
CA2	5.57172e-288	0.629924	0.237	0.047	1.41895e-283	Red.blood.cells
WIF1	2.10118e-275	2.40361	0.3	0.083	5.35108e-271	Red.blood.cells
HBE1	3.92623e-274	8.56118	0.573	0.321	9.99894e-270	Red.blood.cells
FTL	8.71066e-250	0.605012	1	1	2.21834e-245	Red.blood.cells
CPT1A	2.99491e-234	0.261157	0.152	0.023	7.62714e-230	Red.blood.cells
TAL1	3.28188e-229	0.517995	0.248	0.061	8.35796e-225	Red.blood.cells
LXN	3.44566e-228	0.314166	0.157	0.026	8.77507e-224	Red.blood.cells
ADA	2.33984e-220	0.905986	0.279	0.082	5.95887e-216	Red.blood.cells
MAD1L1	1.75196e-207	1.06238	0.437	0.211	4.46172e-203	Red.blood.cells
ABCB10	1.62397e-205	0.436745	0.205	0.048	4.13576e-201	Red.blood.cells
ATP1B2	2.04777e-205	0.555507	0.223	0.057	5.21505e-201	Red.blood.cells
BLVRB	2.81152e-186	2.06495	0.515	0.329	7.16009e-182	Red.blood.cells
PIM2	1.04391e-184	0.327299	0.177	0.039	2.65851e-180	Red.blood.cells
ANK1	1.45493e-183	0.532731	0.274	0.083	3.70528e-179	Red.blood.cells
BPGM	2.2728e-179	0.496934	0.258	0.08	5.78813e-175	Red.blood.cells
FECH	1.38902e-167	0.693435	0.268	0.094	3.53741e-163	Red.blood.cells
UCP2	6.10836e-148	0.479534	0.28	0.098	1.55562e-143	Red.blood.cells
EHBP1L1	4.05158e-140	0.286388	0.168	0.044	1.03182e-135	Red.blood.cells
FRRS1	6.11131e-126	0.729264	0.241	0.093	1.55637e-121	Red.blood.cells
GYPC	4.56153e-102	0.509129	0.321	0.156	1.16169e-97	Red.blood.cells
SMIM1	3.05219e-99	0.853704	0.257	0.121	7.77301e-95	Red.blood.cells
LMO2	2.27407e-96	0.508839	0.285	0.13	5.79138e-92	Red.blood.cells
FAM241A	6.91051e-89	0.762158	0.243	0.115	1.7599e-84	Red.blood.cells
SLC39A8	5.62643e-81	0.456961	0.246	0.115	1.43288e-76	Red.blood.cells
TGFB1	1.27966e-79	0.254826	0.236	0.1	3.25891e-75	Red.blood.cells
SEMA3C	1.70921e-74	1.72463	0.291	0.173	4.35284e-70	Red.blood.cells
STK17A	1.04801e-73	0.444141	0.299	0.159	2.66898e-69	Red.blood.cells
SLC25A39	1.24286e-68	0.630185	0.554	0.447	3.16519e-64	Red.blood.cells
EIF2AK1	1.36047e-68	0.537199	0.709	0.567	3.4647e-64	Red.blood.cells
STMP1	7.35919e-59	0.460429	0.975	0.848	1.87416e-54	Red.blood.cells
GLUL	8.73203e-52	0.557786	0.857	0.68	2.22378e-47	Red.blood.cells
ELL2	7.2762e-49	0.250333	0.204	0.103	1.85303e-44	Red.blood.cells
DNAJA4	1.16698e-45	0.304967	0.195	0.103	2.97195e-41	Red.blood.cells
SLC25A37	1.63195e-37	0.641262	0.271	0.192	4.15609e-33	Red.blood.cells
TCEAL4	5.91355e-36	0.350588	0.984	0.915	1.506e-31	Red.blood.cells
LOC118145580	2.97268e-35	0.910964	0.99	0.926	7.57052e-31	Red.blood.cells
LOC100388856	4.35444e-30	0.345289	0.78	0.66	1.10895e-25	Red.blood.cells
HEXB	4.82757e-26	0.337902	0.226	0.155	1.22944e-21	Red.blood.cells
CPEB4	7.65276e-22	0.296211	0.21	0.145	1.94893e-17	Red.blood.cells
CD46	7.0525e-20	0.259541	0.188	0.127	1.79606e-15	Red.blood.cells
HEBP1	2.351e-17	0.873937	0.298	0.274	5.98728e-13	Red.blood.cells
GLIPR2	2.01256e-15	0.905377	0.283	0.262	5.1254e-11	Red.blood.cells
ATP5IF1	7.38351e-15	0.81888	0.892	0.801	1.88036e-10	Red.blood.cells
C9H12orf29	3.24874e-12	0.254612	0.243	0.196	8.27358e-08	Red.blood.cells
PRDX2	4.00225e-11	0.559047	0.99	0.958	1.01925e-06	Red.blood.cells
HMBS	1.38962e-10	0.433698	0.289	0.27	3.53894e-06	Red.blood.cells
UROD	1.88087e-08	0.595779	0.291	0.293	0.000479001	Red.blood.cells
SLC5A3	0.000721765	0.358854	0.886	0.767	1	Red.blood.cells
TMEM14C	0.000769172	0.785277	0.938	0.889	1	Red.blood.cells
GDF11	0.00211382	0.299441	0.245	0.244	1	Red.blood.cells
NCOA4	0.00732115	0.305616	0.301	0.32	1	Red.blood.cells
CXCL14	0	4.06724	0.815	0.045	0	Surface.ectoderm
WFDC2	0	3.12798	0.82	0.137	0	Surface.ectoderm
WNT6	0	2.91227	0.916	0.028	0	Surface.ectoderm
LOC100401402	0	2.36845	0.981	0.713	0	Surface.ectoderm
LOC100397481	0	1.84777	0.868	0.135	0	Surface.ectoderm
SHTN1	0	1.80541	0.814	0.128	0	Surface.ectoderm
CDH1	0	1.75662	0.788	0.051	0	Surface.ectoderm
CLDN6	0	1.75211	0.813	0.043	0	Surface.ectoderm
TFAP2A	0	1.73938	0.816	0.031	0	Surface.ectoderm
SEMA3E	0	1.71382	0.727	0.153	0	Surface.ectoderm
ALCAM	0	1.68819	0.517	0.117	0	Surface.ectoderm
S100A11	0	1.68529	0.961	0.566	0	Surface.ectoderm
ITGB8	0	1.66423	0.812	0.19	0	Surface.ectoderm
KRT18	0	1.64973	0.99	0.675	0	Surface.ectoderm
TFAP2B	0	1.64916	0.739	0.029	0	Surface.ectoderm
PDGFA	0	1.63792	0.85	0.26	0	Surface.ectoderm
SEMA3D	0	1.54656	0.7	0.081	0	Surface.ectoderm
UTRN	0	1.53476	0.927	0.752	0	Surface.ectoderm
DLX5	0	1.51071	0.686	0.013	0	Surface.ectoderm
TP63	0	1.5066	0.719	0.015	0	Surface.ectoderm
ANKRD6	0	1.47412	0.785	0.153	0	Surface.ectoderm
WLS	0	1.4565	0.988	0.804	0	Surface.ectoderm
EPCAM	0	1.43865	0.874	0.19	0	Surface.ectoderm
HAPLN1	0	1.43602	0.8	0.353	0	Surface.ectoderm
BCAM	0	1.43042	0.769	0.117	0	Surface.ectoderm
EMX2	0	1.38529	0.465	0.031	0	Surface.ectoderm
CXCL12	0	1.37111	0.372	0.06	0	Surface.ectoderm
SLITRK6	0	1.36722	0.425	0.046	0	Surface.ectoderm
FREM2	0	1.3601	0.662	0.141	0	Surface.ectoderm
CDH3	0	1.33492	0.881	0.437	0	Surface.ectoderm
PTPRF	0	1.28966	0.916	0.582	0	Surface.ectoderm
PERP	0	1.2657	0.983	0.769	0	Surface.ectoderm
TACSTD2	0	1.23764	0.605	0.028	0	Surface.ectoderm
FLRT3	0	1.20074	0.787	0.496	0	Surface.ectoderm
TBX3	0	1.19097	0.763	0.519	0	Surface.ectoderm
SULF2	0	1.1865	0.937	0.756	0	Surface.ectoderm
CLDN7	0	1.18327	0.687	0.05	0	Surface.ectoderm
FERMT1	0	1.16452	0.664	0.034	0	Surface.ectoderm
SLC16A1	0	1.15964	0.942	0.775	0	Surface.ectoderm
TMEM54	0	1.10705	0.745	0.181	0	Surface.ectoderm
GATA3	0	1.08631	0.702	0.231	0	Surface.ectoderm
ARL4A	0	1.08011	0.638	0.306	0	Surface.ectoderm
LOC100394518	0	1.03934	0.571	0.033	0	Surface.ectoderm
KIAA1217	0	1.01721	0.668	0.196	0	Surface.ectoderm
TPM1	0	1.00437	0.967	0.842	0	Surface.ectoderm
ESRP1	0	1.0017	0.609	0.055	0	Surface.ectoderm
SVIL	0	0.996856	0.586	0.211	0	Surface.ectoderm
VAV3	0	0.96567	0.56	0.069	0	Surface.ectoderm
LAMA5	0	0.93339	0.724	0.298	0	Surface.ectoderm
LOC100388209	0	0.926334	0.625	0.137	0	Surface.ectoderm
DSP	0	0.925454	0.984	0.857	0	Surface.ectoderm
KRT8	0	0.923824	0.955	0.65	0	Surface.ectoderm
SOST	0	0.921941	0.345	0.016	0	Surface.ectoderm
SPTBN1	0	0.916074	0.946	0.84	0	Surface.ectoderm
VAMP8	0	0.909242	0.765	0.274	0	Surface.ectoderm
TNC	0	0.9086	0.464	0.015	0	Surface.ectoderm
UNC5B	0	0.907303	0.496	0.156	0	Surface.ectoderm
TDRP	0	0.902809	0.681	0.208	0	Surface.ectoderm
SPINT2	0	0.899616	0.777	0.294	0	Surface.ectoderm
ARHGAP29	0	0.882285	0.713	0.279	0	Surface.ectoderm
ECSCR	0	0.873871	0.554	0.042	0	Surface.ectoderm
ACP3	0	0.862784	0.533	0.037	0	Surface.ectoderm
IGFBP6	0	0.843331	0.272	0.023	0	Surface.ectoderm
LIPG	0	0.832901	0.528	0.17	0	Surface.ectoderm
ERRFI1	0	0.830887	0.559	0.15	0	Surface.ectoderm
DAG1	0	0.82147	0.807	0.526	0	Surface.ectoderm
MAOA	0	0.81034	0.522	0.066	0	Surface.ectoderm
PDLIM1	0	0.803363	0.582	0.164	0	Surface.ectoderm
EFNA5	0	0.801986	0.632	0.255	0	Surface.ectoderm
GRHL2	0	0.800154	0.496	0.021	0	Surface.ectoderm
ADAMTS19	0	0.797635	0.609	0.269	0	Surface.ectoderm
MSX2	0	0.794319	0.482	0.154	0	Surface.ectoderm
FAM83B	0	0.792492	0.495	0.032	0	Surface.ectoderm
F11R	0	0.785152	0.645	0.187	0	Surface.ectoderm
ANXA2	0	0.784941	0.909	0.561	0	Surface.ectoderm
MAP2	0	0.777586	0.506	0.144	0	Surface.ectoderm
CNKSR2	0	0.773473	0.472	0.045	0	Surface.ectoderm
CRISPLD1	0	0.762665	0.97	0.846	0	Surface.ectoderm
LYPD6B	0	0.758569	0.543	0.151	0	Surface.ectoderm
RASSF8	0	0.750901	0.608	0.307	0	Surface.ectoderm
GGTA1	0	0.748068	0.524	0.106	0	Surface.ectoderm
S100A16	0	0.743325	0.537	0.112	0	Surface.ectoderm
DSC2	0	0.743176	0.771	0.458	0	Surface.ectoderm
LOC100411069	0	0.735832	0.519	0.109	0	Surface.ectoderm
HOOK1	0	0.733464	0.542	0.158	0	Surface.ectoderm
SYDE2	0	0.73038	0.6	0.213	0	Surface.ectoderm
ITGA6	0	0.72657	0.616	0.24	0	Surface.ectoderm
LAMB1	0	0.713995	0.822	0.595	0	Surface.ectoderm
SLC40A1	0	0.712928	0.433	0.11	0	Surface.ectoderm
CPE	0	0.711266	0.865	0.71	0	Surface.ectoderm
WNT3	0	0.709799	0.441	0.011	0	Surface.ectoderm
STON2	0	0.707392	0.513	0.124	0	Surface.ectoderm
PDXK	0	0.704649	0.597	0.192	0	Surface.ectoderm
PRSS23	0	0.700835	0.503	0.098	0	Surface.ectoderm
METRNL	0	0.700828	0.464	0.09	0	Surface.ectoderm
EXT1	0	0.69796	0.673	0.4	0	Surface.ectoderm
BMP7	0	0.695861	0.56	0.192	0	Surface.ectoderm
FJX1	0	0.683761	0.525	0.148	0	Surface.ectoderm
ARL4C	0	0.662929	0.898	0.726	0	Surface.ectoderm
MET	0	0.656822	0.434	0.035	0	Surface.ectoderm
AGRN	0	0.656514	0.792	0.518	0	Surface.ectoderm
AP1M2	0	0.653354	0.461	0.032	0	Surface.ectoderm
F8	0	0.641359	0.519	0.194	0	Surface.ectoderm
ALDH7A1	0	0.639275	0.843	0.669	0	Surface.ectoderm
CXADR	0	0.638378	0.489	0.094	0	Surface.ectoderm
STXBP6	0	0.637143	0.484	0.176	0	Surface.ectoderm
CDC42SE1	0	0.633783	0.583	0.224	0	Surface.ectoderm
DKK3	0	0.632319	0.601	0.21	0	Surface.ectoderm
COL4A6	0	0.628407	0.511	0.206	0	Surface.ectoderm
BHLHA9	0	0.62101	0.32	0.012	0	Surface.ectoderm
SP6	0	0.621009	0.372	0.052	0	Surface.ectoderm
MAL2	0	0.614626	0.4	0.035	0	Surface.ectoderm
ACSL3	0	0.604138	0.863	0.687	0	Surface.ectoderm
RETREG1	0	0.603295	0.414	0.046	0	Surface.ectoderm
NTF4	0	0.602571	0.414	0.03	0	Surface.ectoderm
FOLR1	0	0.599508	0.843	0.571	0	Surface.ectoderm
RPS27	0	0.592679	1	1	0	Surface.ectoderm
EZR	0	0.592118	0.903	0.728	0	Surface.ectoderm
PTPN14	0	0.588428	0.513	0.181	0	Surface.ectoderm
NSG1	0	0.586651	0.602	0.271	0	Surface.ectoderm
GPX3	0	0.58557	0.443	0.145	0	Surface.ectoderm
ITGA3	0	0.574826	0.405	0.044	0	Surface.ectoderm
TINAGL1	0	0.572986	0.388	0.03	0	Surface.ectoderm
ATP6V1G1	0	0.572154	0.999	0.987	0	Surface.ectoderm
DTNA	0	0.56702	0.322	0.033	0	Surface.ectoderm
ASAH1	0	0.55914	0.581	0.257	0	Surface.ectoderm
PATJ	0	0.556029	0.468	0.124	0	Surface.ectoderm
KCTD1	0	0.55407	0.432	0.093	0	Surface.ectoderm
ARHGEF19	0	0.551659	0.393	0.04	0	Surface.ectoderm
ADAM23	0	0.551343	0.358	0.096	0	Surface.ectoderm
DMP1	0	0.548887	0.142	0.004	0	Surface.ectoderm
FZD6	0	0.545278	0.465	0.169	0	Surface.ectoderm
RPS4X	0	0.543296	1	1	0	Surface.ectoderm
SPINT1	0	0.534437	0.381	0.077	0	Surface.ectoderm
RPL17	0	0.534093	1	1	0	Surface.ectoderm
RPL9	0	0.533271	1	1	0	Surface.ectoderm
CDC42EP5	0	0.532785	0.475	0.149	0	Surface.ectoderm
COX4I2	0	0.526946	0.332	0.018	0	Surface.ectoderm
EXPH5	0	0.526132	0.307	0.021	0	Surface.ectoderm
RPS15A	0	0.51869	1	1	0	Surface.ectoderm
LRRIQ1	0	0.514384	0.502	0.194	0	Surface.ectoderm
EFNA1	0	0.514201	0.45	0.148	0	Surface.ectoderm
KITLG	0	0.513934	0.305	0.066	0	Surface.ectoderm
MAPK13	0	0.5105	0.332	0.008	0	Surface.ectoderm
RPL15	0	0.509452	1	0.997	0	Surface.ectoderm
PDLIM4	0	0.509126	0.585	0.269	0	Surface.ectoderm
PLEKHH1	0	0.507056	0.451	0.152	0	Surface.ectoderm
RPS27A	0	0.503908	1	1	0	Surface.ectoderm
GDF6	0	0.498146	0.338	0.085	0	Surface.ectoderm
WNT7A	0	0.497025	0.246	0.006	0	Surface.ectoderm
PLXDC2	0	0.495658	0.518	0.217	0	Surface.ectoderm
SLC6A15	0	0.492556	0.35	0.087	0	Surface.ectoderm
SH3YL1	0	0.492201	0.357	0.034	0	Surface.ectoderm
LOC118146826	0	0.490706	0.258	0.026	0	Surface.ectoderm
RPS12	0	0.489475	1	1	0	Surface.ectoderm
NEFM	0	0.489129	0.268	0.068	0	Surface.ectoderm
DLK2	0	0.488825	0.338	0.067	0	Surface.ectoderm
SH2D4A	0	0.486781	0.43	0.118	0	Surface.ectoderm
RPL35A	0	0.486611	1	1	0	Surface.ectoderm
RNF152	0	0.483186	0.47	0.18	0	Surface.ectoderm
RPS18	0	0.480755	1	1	0	Surface.ectoderm
RNF43	0	0.480208	0.339	0.022	0	Surface.ectoderm
VAT1L	0	0.479195	0.388	0.087	0	Surface.ectoderm
RPS19	0	0.477792	1	1	0	Surface.ectoderm
EDNRB	0	0.475804	0.345	0.058	0	Surface.ectoderm
RPL37	0	0.475061	1	1	0	Surface.ectoderm
SH3BGRL2	0	0.474075	0.496	0.201	0	Surface.ectoderm
SLFN11	0	0.472128	0.32	0.069	0	Surface.ectoderm
ARHGAP8	0	0.47184	0.416	0.106	0	Surface.ectoderm
PDGFC	0	0.467788	0.343	0.092	0	Surface.ectoderm
GRHL1	0	0.467729	0.327	0.027	0	Surface.ectoderm
CAPN1	0	0.46573	0.411	0.122	0	Surface.ectoderm
RPS5	0	0.464216	1	1	0	Surface.ectoderm
WNT4	0	0.460859	0.273	0.021	0	Surface.ectoderm
PPL	0	0.460293	0.287	0.011	0	Surface.ectoderm
LMO7	0	0.455678	0.298	0.045	0	Surface.ectoderm
TFAP2C	0	0.452271	0.271	0.008	0	Surface.ectoderm
VTCN1	0	0.45038	0.155	0.005	0	Surface.ectoderm
AKTIP	0	0.447643	0.367	0.082	0	Surface.ectoderm
FAAH2	0	0.445871	0.344	0.068	0	Surface.ectoderm
RPS17	0	0.445704	1	1	0	Surface.ectoderm
TMEM238	0	0.444337	0.282	0.018	0	Surface.ectoderm
SMAGP	0	0.443915	0.363	0.069	0	Surface.ectoderm
FGF2	0	0.44357	0.307	0.05	0	Surface.ectoderm
DLX6	0	0.441232	0.283	0.003	0	Surface.ectoderm
RPL10A	0	0.438523	1	1	0	Surface.ectoderm
EEF1G	0	0.435239	1	1	0	Surface.ectoderm
STARD10	0	0.431409	0.378	0.096	0	Surface.ectoderm
PRAP1	0	0.424573	0.335	0.079	0	Surface.ectoderm
ZNF385A	0	0.423109	0.382	0.108	0	Surface.ectoderm
S100A14	0	0.41834	0.27	0.018	0	Surface.ectoderm
RPS16	0	0.418049	1	1	0	Surface.ectoderm
DNMBP	0	0.409138	0.395	0.139	0	Surface.ectoderm
GPR85	0	0.407327	0.317	0.062	0	Surface.ectoderm
RPL5	0	0.405443	1	0.999	0	Surface.ectoderm
IRF6	0	0.403195	0.275	0.013	0	Surface.ectoderm
LOC100393983	0	0.402222	0.201	0.02	0	Surface.ectoderm
RPL10	0	0.395765	1	1	0	Surface.ectoderm
RPL13A	0	0.395634	1	1	0	Surface.ectoderm
RPL11	0	0.392842	1	1	0	Surface.ectoderm
LOC103791129	0	0.389571	0.185	0.017	0	Surface.ectoderm
NPNT	0	0.387186	0.371	0.114	0	Surface.ectoderm
TPT1	0	0.384294	1	1	0	Surface.ectoderm
MAP7	0	0.384112	0.39	0.114	0	Surface.ectoderm
IKZF2	0	0.384014	0.32	0.089	0	Surface.ectoderm
UGT8	0	0.382144	0.333	0.1	0	Surface.ectoderm
SH3BP5	0	0.381426	0.286	0.048	0	Surface.ectoderm
OCLN	0	0.380842	0.32	0.051	0	Surface.ectoderm
CLDN3	0	0.37888	0.256	0.021	0	Surface.ectoderm
MARVELD3	0	0.376723	0.267	0.016	0	Surface.ectoderm
NELL1	0	0.376602	0.26	0.029	0	Surface.ectoderm
PRSS22	0	0.370624	0.251	0.012	0	Surface.ectoderm
FXYD3	0	0.370498	0.221	0.004	0	Surface.ectoderm
RAB25	0	0.369267	0.264	0.012	0	Surface.ectoderm
LOC103792373	0	0.368065	0.279	0.052	0	Surface.ectoderm
RALYL	0	0.364604	0.218	0.02	0	Surface.ectoderm
GALNT10	0	0.363448	0.287	0.078	0	Surface.ectoderm
ARSD	0	0.360194	0.301	0.072	0	Surface.ectoderm
C20H16orf74	0	0.359857	0.246	0.016	0	Surface.ectoderm
LOC100409955	0	0.359118	0.25	0.051	0	Surface.ectoderm
LOC100414419	0	0.355058	0.303	0.078	0	Surface.ectoderm
CYP2W1	0	0.351179	0.272	0.047	0	Surface.ectoderm
SHANK2	0	0.350946	0.251	0.035	0	Surface.ectoderm
OSBPL3	0	0.350095	0.276	0.063	0	Surface.ectoderm
CGN	0	0.344401	0.294	0.068	0	Surface.ectoderm
HPN	0	0.340332	0.28	0.033	0	Surface.ectoderm
CRB3	0	0.34033	0.264	0.033	0	Surface.ectoderm
PLS1	0	0.339431	0.3	0.077	0	Surface.ectoderm
CDS1	0	0.328866	0.235	0.018	0	Surface.ectoderm
SCIN	0	0.325608	0.193	0.011	0	Surface.ectoderm
CORO2A	0	0.322125	0.234	0.042	0	Surface.ectoderm
LYPD1	0	0.31919	0.166	0.013	0	Surface.ectoderm
LOC103789166	0	0.31813	0.195	0.004	0	Surface.ectoderm
C2H5orf38	0	0.316924	0.191	0.02	0	Surface.ectoderm
LRATD1	0	0.313215	0.211	0.02	0	Surface.ectoderm
LOC118145836	0	0.312726	0.211	0.019	0	Surface.ectoderm
CHL1	0	0.309595	0.197	0.018	0	Surface.ectoderm
MBP	0	0.306602	0.245	0.044	0	Surface.ectoderm
PPP1R13L	0	0.305771	0.258	0.06	0	Surface.ectoderm
CCDC39	0	0.305563	0.23	0.042	0	Surface.ectoderm
FBXO2	0	0.303974	0.231	0.044	0	Surface.ectoderm
TMEM229A	0	0.300232	0.177	0.021	0	Surface.ectoderm
SP9	0	0.298012	0.167	0.024	0	Surface.ectoderm
KLC3	0	0.296388	0.201	0.013	0	Surface.ectoderm
KLF5	0	0.295385	0.255	0.057	0	Surface.ectoderm
LOC118150564	0	0.293786	0.202	0.03	0	Surface.ectoderm
EPHB6	0	0.293046	0.235	0.053	0	Surface.ectoderm
LARGE2	0	0.288594	0.206	0.023	0	Surface.ectoderm
C7H1orf210	0	0.287684	0.211	0.018	0	Surface.ectoderm
CA4	0	0.285845	0.142	0.011	0	Surface.ectoderm
C22H19orf33	0	0.276099	0.215	0.04	0	Surface.ectoderm
UPK2	0	0.275559	0.14	0.005	0	Surface.ectoderm
ANXA9	0	0.266242	0.179	0.006	0	Surface.ectoderm
HSPB8	0	0.265236	0.187	0.023	0	Surface.ectoderm
WNT9B	0	0.261124	0.161	0.003	0	Surface.ectoderm
ESRP2	0	0.25814	0.182	0.013	0	Surface.ectoderm
NXNL2	0	0.25456	0.188	0.034	0	Surface.ectoderm
PLLP	0	0.253123	0.188	0.026	0	Surface.ectoderm
PLCXD3	0	0.252527	0.154	0.014	0	Surface.ectoderm
STX3	0	0.250791	0.205	0.034	0	Surface.ectoderm
RPL12	9.78739e-308	0.423092	1	1	2.49255e-303	Surface.ectoderm
CLU	5.84253e-305	0.806002	0.949	0.845	1.48792e-300	Surface.ectoderm
RPS7	2.55211e-303	0.425755	1	1	6.49946e-299	Surface.ectoderm
OLFM2	7.38808e-301	0.316897	0.29	0.081	1.88152e-296	Surface.ectoderm
TPD52	6.17846e-300	0.372938	0.356	0.115	1.57347e-295	Surface.ectoderm
SORL1	1.86631e-299	0.539998	0.542	0.247	4.75294e-295	Surface.ectoderm
RPL23	9.3089e-299	0.425099	1	1	2.3707e-294	Surface.ectoderm
PIK3IP1	1.59267e-298	0.409781	0.248	0.063	4.05606e-294	Surface.ectoderm
LOC100405128	1.90714e-298	0.282179	0.234	0.055	4.85691e-294	Surface.ectoderm
IRX2	1.96654e-297	0.375955	0.192	0.039	5.00819e-293	Surface.ectoderm
RAB11FIP4	2.59256e-296	0.470307	0.466	0.189	6.60248e-292	Surface.ectoderm
PLEKHG4B	2.75633e-296	0.36575	0.314	0.095	7.01956e-292	Surface.ectoderm
CA12	8.92533e-296	0.266358	0.212	0.046	2.27301e-291	Surface.ectoderm
ETV1	5.42371e-295	0.49267	0.468	0.19	1.38126e-290	Surface.ectoderm
RPS8	5.82435e-295	0.385713	1	1	1.48329e-290	Surface.ectoderm
MAPRE2	2.36205e-292	0.637639	0.505	0.241	6.01544e-288	Surface.ectoderm
KRT19	9.09359e-292	0.45625	0.938	0.693	2.31586e-287	Surface.ectoderm
ELF1	1.90683e-289	0.485275	0.606	0.294	4.85613e-285	Surface.ectoderm
DDR1	1.29901e-287	0.398554	0.401	0.148	3.30819e-283	Surface.ectoderm
ITM2C	9.0513e-285	0.560376	0.871	0.682	2.3051e-280	Surface.ectoderm
RBPMS	9.70645e-285	0.569165	0.788	0.569	2.47194e-280	Surface.ectoderm
FRAS1	1.66258e-284	0.602275	0.572	0.28	4.23408e-280	Surface.ectoderm
RPL27	6.16275e-280	0.407607	1	1	1.56947e-275	Surface.ectoderm
LOC100392089	2.19618e-279	0.432808	1	1	5.59301e-275	Surface.ectoderm
ITPR2	3.38821e-278	0.539576	0.552	0.258	8.62876e-274	Surface.ectoderm
PLEKHF2	9.87416e-278	0.368134	0.362	0.127	2.51465e-273	Surface.ectoderm
TLR2	2.27664e-277	0.328106	0.279	0.08	5.79791e-273	Surface.ectoderm
CCDC3	4.48715e-277	0.30141	0.158	0.028	1.14274e-272	Surface.ectoderm
AOPEP	1.16952e-276	0.436662	0.457	0.19	2.97842e-272	Surface.ectoderm
PTPRU	1.63669e-276	0.250694	0.224	0.054	4.16815e-272	Surface.ectoderm
RPS29	1.99389e-276	0.464801	1	1	5.07785e-272	Surface.ectoderm
PLP2	2.64975e-276	0.53615	0.669	0.381	6.74813e-272	Surface.ectoderm
RPLP1	3.01304e-276	0.399249	1	1	7.67332e-272	Surface.ectoderm
RPL8	4.35472e-276	0.39199	1	1	1.10902e-271	Surface.ectoderm
STRA6	4.62559e-276	0.418059	0.463	0.191	1.178e-271	Surface.ectoderm
RPS26	2.07757e-275	0.366714	1	1	5.29095e-271	Surface.ectoderm
PNRC1	3.93644e-274	0.544324	0.91	0.809	1.00249e-269	Surface.ectoderm
SCUBE3	2.53949e-273	0.551674	0.745	0.458	6.46732e-269	Surface.ectoderm
UBA52	2.65283e-273	0.381958	1	1	6.75595e-269	Surface.ectoderm
LOC100392033	1.51674e-271	0.397157	1	1	3.86268e-267	Surface.ectoderm
DPPA4	7.17075e-271	0.273886	0.216	0.051	1.82617e-266	Surface.ectoderm
TGIF1	1.18715e-270	0.537959	0.657	0.38	3.02331e-266	Surface.ectoderm
CMTM4	6.03033e-270	0.366733	0.369	0.133	1.53574e-265	Surface.ectoderm
TANC1	3.86974e-269	0.470102	0.48	0.21	9.85507e-265	Surface.ectoderm
TNFRSF12A	7.71453e-267	0.259005	0.205	0.047	1.96466e-262	Surface.ectoderm
SEM1	1.43275e-266	0.456322	0.997	0.986	3.64879e-262	Surface.ectoderm
MAD2L2	8.4975e-266	0.487653	0.603	0.317	2.16406e-261	Surface.ectoderm
HDGF	2.26085e-264	0.48831	0.97	0.921	5.75772e-260	Surface.ectoderm
LOC103794083	2.98908e-262	0.348241	0.282	0.085	7.61229e-258	Surface.ectoderm
LOC100387311	3.69738e-261	0.367216	0.376	0.14	9.41612e-257	Surface.ectoderm
TSPAN13	1.03748e-259	0.473204	0.573	0.281	2.64215e-255	Surface.ectoderm
MYO5C	1.18443e-259	0.297746	0.284	0.086	3.01639e-255	Surface.ectoderm
RPS23	1.78437e-258	0.356914	1	1	4.54425e-254	Surface.ectoderm
FLNB	8.34847e-257	0.57552	0.54	0.269	2.1261e-252	Surface.ectoderm
FBXO25	3.33171e-256	0.407164	0.431	0.18	8.48487e-252	Surface.ectoderm
RPS10	1.41298e-254	0.37293	1	1	3.59845e-250	Surface.ectoderm
LOC108589742	3.98979e-254	0.264173	0.224	0.058	1.01608e-249	Surface.ectoderm
GPRC5C	5.97114e-254	0.361163	0.379	0.143	1.52067e-249	Surface.ectoderm
ANXA3	2.80637e-253	0.326892	0.244	0.067	7.14699e-249	Surface.ectoderm
MBNL2	2.63114e-252	0.485566	0.546	0.273	6.70072e-248	Surface.ectoderm
TMEM87B	2.72662e-252	0.393315	0.432	0.18	6.94389e-248	Surface.ectoderm
RPS3	1.03066e-251	0.333759	1	1	2.62477e-247	Surface.ectoderm
IQGAP1	2.26243e-251	0.587051	0.714	0.491	5.76173e-247	Surface.ectoderm
CTNNA1	8.05412e-248	0.481574	0.932	0.852	2.05114e-243	Surface.ectoderm
FAU	9.03152e-248	0.365761	1	1	2.30006e-243	Surface.ectoderm
RPL27A	1.34406e-247	0.346767	1	1	3.42292e-243	Surface.ectoderm
ADAMTS18	1.04978e-246	0.438956	0.381	0.146	2.67346e-242	Surface.ectoderm
NREP	8.8594e-246	0.496663	0.965	0.89	2.25622e-241	Surface.ectoderm
EEF1B2	4.50035e-242	0.377459	1	0.999	1.1461e-237	Surface.ectoderm
TEAD3	7.25303e-242	0.370261	0.381	0.151	1.84713e-237	Surface.ectoderm
PDE5A	1.94754e-241	0.491313	0.583	0.305	4.9598e-237	Surface.ectoderm
SH3GLB2	2.77658e-241	0.337891	0.347	0.128	7.07111e-237	Surface.ectoderm
SERPINI1	3.01397e-240	0.441659	0.412	0.175	7.67568e-236	Surface.ectoderm
DSG2	3.13535e-239	0.513681	0.822	0.585	7.9848e-235	Surface.ectoderm
MBNL3	1.65544e-238	0.423545	0.297	0.1	4.2159e-234	Surface.ectoderm
SLC38A4	1.95204e-238	0.309027	0.286	0.092	4.97127e-234	Surface.ectoderm
LOC108592412	6.59467e-238	0.381354	0.403	0.165	1.67946e-233	Surface.ectoderm
CCSER1	3.03541e-237	0.26799	0.183	0.042	7.73027e-233	Surface.ectoderm
B3GNT2	4.23784e-234	0.391522	0.47	0.208	1.07925e-229	Surface.ectoderm
TIPARP	6.79013e-234	0.394258	0.377	0.151	1.72924e-229	Surface.ectoderm
RPL18	2.14314e-232	0.340439	1	1	5.45794e-228	Surface.ectoderm
RPL13	5.1758e-232	0.330576	1	1	1.31812e-227	Surface.ectoderm
LOC118153072	2.8007e-231	0.607745	0.57	0.312	7.13254e-227	Surface.ectoderm
FRMD6	2.23035e-230	0.396286	0.565	0.281	5.68002e-226	Surface.ectoderm
SLC39A10	1.45548e-229	0.547655	0.959	0.908	3.70667e-225	Surface.ectoderm
ARPC2	6.7713e-229	0.404865	0.985	0.938	1.72445e-224	Surface.ectoderm
PGAP2	1.33172e-228	0.365936	0.415	0.178	3.3915e-224	Surface.ectoderm
LIN28A	1.18196e-227	0.393003	0.983	0.884	3.01009e-223	Surface.ectoderm
S100A1	2.31146e-227	0.373445	0.321	0.116	5.88659e-223	Surface.ectoderm
TMED9	6.1383e-227	0.44879	0.932	0.86	1.56324e-222	Surface.ectoderm
PHLDA1	8.36727e-227	0.495332	0.35	0.137	2.13089e-222	Surface.ectoderm
EEF1A1	1.20181e-226	0.359803	1	1	3.06065e-222	Surface.ectoderm
PAWR	3.63227e-225	0.545321	0.851	0.712	9.25031e-221	Surface.ectoderm
LMO4	4.58903e-225	0.511361	0.898	0.746	1.16869e-220	Surface.ectoderm
RPL21	7.76168e-225	0.34298	1	1	1.97667e-220	Surface.ectoderm
LOC100404768	5.36619e-224	0.428491	0.42	0.184	1.36661e-219	Surface.ectoderm
CTNNB1	8.68567e-224	0.445968	0.969	0.926	2.21198e-219	Surface.ectoderm
SLC2A1	2.60088e-222	0.856165	0.759	0.562	6.62366e-218	Surface.ectoderm
WWC3	1.30574e-220	0.461826	0.511	0.259	3.32533e-216	Surface.ectoderm
SPRY1	1.00458e-219	0.469917	0.402	0.174	2.55838e-215	Surface.ectoderm
RPL31	5.6662e-218	0.481526	0.998	0.99	1.44301e-213	Surface.ectoderm
SLC7A8	7.53931e-216	0.527719	0.401	0.177	1.92004e-211	Surface.ectoderm
TMEM106B	4.46542e-215	0.449471	0.517	0.269	1.13721e-210	Surface.ectoderm
FAM234A	6.07386e-215	0.380822	0.45	0.209	1.54683e-210	Surface.ectoderm
TP53INP1	1.19169e-213	0.271821	0.257	0.082	3.03488e-209	Surface.ectoderm
PKP2	2.21266e-213	0.431875	0.495	0.242	5.63498e-209	Surface.ectoderm
IFI16	2.49061e-213	0.796457	0.521	0.274	6.34284e-209	Surface.ectoderm
RPS28	1.09259e-212	0.343798	1	1	2.78249e-208	Surface.ectoderm
RPL7	4.82828e-212	0.334111	1	0.999	1.22962e-207	Surface.ectoderm
AJUBA	4.78598e-211	0.36825	0.435	0.198	1.21885e-206	Surface.ectoderm
LOC100413319	4.08575e-209	0.405781	0.453	0.218	1.04052e-204	Surface.ectoderm
CHST11	4.32381e-209	0.250053	0.209	0.059	1.10114e-204	Surface.ectoderm
RPS13	9.54527e-208	0.336176	1	1	2.43089e-203	Surface.ectoderm
SATB1	1.82708e-207	0.448257	0.583	0.327	4.65302e-203	Surface.ectoderm
PDK1	1.92054e-205	0.593327	0.612	0.384	4.89104e-201	Surface.ectoderm
LOC100407306	4.21265e-205	0.394941	0.998	0.991	1.07284e-200	Surface.ectoderm
LOC100409061	4.38089e-202	0.445811	0.562	0.315	1.11568e-197	Surface.ectoderm
DUSP23	2.40507e-201	0.361316	0.414	0.189	6.125e-197	Surface.ectoderm
ZNF101	2.56236e-201	0.441191	0.451	0.22	6.52555e-197	Surface.ectoderm
RPLP0	2.90103e-200	0.281019	1	1	7.38805e-196	Surface.ectoderm
ZFP42	1.6282e-199	0.38	0.522	0.263	4.14653e-195	Surface.ectoderm
RPS14	1.86362e-198	0.338511	1	1	4.74607e-194	Surface.ectoderm
COL18A1	3.74057e-198	0.605645	0.937	0.863	9.5261e-194	Surface.ectoderm
MGST2	7.42574e-198	0.296542	0.312	0.118	1.89111e-193	Surface.ectoderm
NLN	3.70961e-196	0.369665	0.418	0.193	9.44725e-192	Surface.ectoderm
ACBD6	9.57098e-196	0.428207	0.613	0.369	2.43744e-191	Surface.ectoderm
FRMD4B	3.93125e-195	0.38185	0.507	0.257	1.00117e-190	Surface.ectoderm
IGDCC3	2.37792e-192	0.489167	0.981	0.898	6.05584e-188	Surface.ectoderm
AHNAK	5.45148e-192	0.55815	0.811	0.607	1.38833e-187	Surface.ectoderm
UNC5C	2.4948e-190	0.646148	0.503	0.262	6.3535e-186	Surface.ectoderm
TRIM44	2.52064e-190	0.456957	0.856	0.747	6.41932e-186	Surface.ectoderm
ANK3	4.51977e-190	0.547533	0.674	0.464	1.15105e-185	Surface.ectoderm
COBLL1	9.30375e-190	0.306838	0.404	0.175	2.36939e-185	Surface.ectoderm
COL2A1	6.77714e-189	0.599056	0.481	0.251	1.72593e-184	Surface.ectoderm
CCDC88C	4.57968e-188	0.370694	0.485	0.241	1.16631e-183	Surface.ectoderm
RACK1	5.50116e-187	0.299689	1	1	1.40098e-182	Surface.ectoderm
CHP1	1.56735e-186	0.416418	0.519	0.286	3.99156e-182	Surface.ectoderm
MAP3K20	3.77074e-186	0.262316	0.278	0.101	9.60293e-182	Surface.ectoderm
TMEM123	5.19577e-186	0.443776	0.769	0.594	1.32321e-181	Surface.ectoderm
CDC42EP3	1.61174e-185	0.286909	0.308	0.12	4.10461e-181	Surface.ectoderm
COL26A1	1.56895e-184	0.361349	0.451	0.221	3.99563e-180	Surface.ectoderm
TMTC2	2.85077e-184	0.29092	0.284	0.106	7.26006e-180	Surface.ectoderm
DISP1	4.98539e-184	0.449051	0.512	0.28	1.26963e-179	Surface.ectoderm
IFI27L2	1.38775e-183	0.455512	0.677	0.463	3.53419e-179	Surface.ectoderm
ETHE1	3.46147e-183	0.402649	0.399	0.19	8.81533e-179	Surface.ectoderm
RPS11	1.79096e-182	0.330067	1	1	4.56104e-178	Surface.ectoderm
OAT	4.65723e-182	0.501525	0.721	0.549	1.18606e-177	Surface.ectoderm
LOC100410631	3.06999e-181	0.389213	0.991	0.975	7.81833e-177	Surface.ectoderm
PRKCZ	5.02845e-181	0.26341	0.296	0.114	1.28059e-176	Surface.ectoderm
LOC103788868	5.6835e-181	0.281123	0.297	0.115	1.44742e-176	Surface.ectoderm
BCL2L1	9.80541e-177	0.352441	0.435	0.216	2.49714e-172	Surface.ectoderm
CCDC186	1.60757e-176	0.483146	0.555	0.33	4.094e-172	Surface.ectoderm
HMGN5	5.88587e-174	0.501913	0.535	0.307	1.49895e-169	Surface.ectoderm
RPL18A	3.90358e-173	0.311146	1	1	9.94125e-169	Surface.ectoderm
NUP210	4.87484e-173	0.300446	0.345	0.149	1.24148e-168	Surface.ectoderm
NAV2	2.61481e-172	0.436592	0.544	0.305	6.65914e-168	Surface.ectoderm
HSPG2	2.99231e-172	0.331075	0.415	0.202	7.62051e-168	Surface.ectoderm
RGL2	4.54435e-171	0.3005	0.366	0.165	1.15731e-166	Surface.ectoderm
ISYNA1	5.17316e-171	0.391875	0.943	0.863	1.31745e-166	Surface.ectoderm
ZNRF3	3.06962e-170	0.390698	0.454	0.235	7.81741e-166	Surface.ectoderm
ATP2B1	8.31923e-170	0.576794	0.887	0.835	2.11866e-165	Surface.ectoderm
PPP2R2B	3.8494e-169	0.282735	0.139	0.034	9.80327e-165	Surface.ectoderm
CTNND1	8.59733e-169	0.449578	0.824	0.727	2.18948e-164	Surface.ectoderm
PEG3	2.30213e-167	0.571771	0.999	0.944	5.86283e-163	Surface.ectoderm
MYH9	2.22034e-164	0.467267	0.848	0.733	5.65453e-160	Surface.ectoderm
HMCN1	3.649e-164	0.436553	0.443	0.232	9.29291e-160	Surface.ectoderm
LOC118142830	5.13581e-164	0.277239	0.309	0.129	1.30794e-159	Surface.ectoderm
SPECC1	1.24077e-163	0.394236	0.42	0.211	3.15987e-159	Surface.ectoderm
PRKAA2	1.93998e-162	0.318293	0.338	0.15	4.94056e-158	Surface.ectoderm
ZFHX3	6.3807e-162	0.471589	0.786	0.644	1.62497e-157	Surface.ectoderm
RPL37A	1.08802e-161	0.319184	1	1	2.77085e-157	Surface.ectoderm
CDH13	4.17587e-161	0.507554	0.317	0.142	1.06347e-156	Surface.ectoderm
RAB38	1.0135e-160	0.435148	0.492	0.274	2.58107e-156	Surface.ectoderm
AIG1	7.32113e-160	0.288057	0.365	0.168	1.86447e-155	Surface.ectoderm
SLIT2	8.40625e-160	0.304816	0.384	0.179	2.14082e-155	Surface.ectoderm
RPL36	1.18484e-158	0.301722	1	1	3.01744e-154	Surface.ectoderm
PRXL2A	2.22571e-158	0.451742	0.774	0.606	5.66822e-154	Surface.ectoderm
STK26	4.41111e-158	0.331387	0.46	0.24	1.12338e-153	Surface.ectoderm
AXL	6.44432e-158	0.385427	0.632	0.413	1.64117e-153	Surface.ectoderm
FBXW4	2.30601e-157	0.361483	0.529	0.302	5.8727e-153	Surface.ectoderm
CD59	2.37804e-156	0.442735	0.696	0.525	6.05615e-152	Surface.ectoderm
CRMP1	3.58473e-156	0.258676	0.206	0.069	9.12923e-152	Surface.ectoderm
MYH10	1.22946e-155	0.515228	0.963	0.909	3.13106e-151	Surface.ectoderm
TSPAN6	2.69453e-155	0.368105	0.904	0.809	6.86217e-151	Surface.ectoderm
RAB11FIP1	4.73715e-155	0.393352	0.53	0.308	1.20641e-150	Surface.ectoderm
FABP5	5.63184e-155	0.511559	0.754	0.604	1.43426e-150	Surface.ectoderm
ADIRF	1.42643e-154	0.405843	0.43	0.225	3.63269e-150	Surface.ectoderm
STT3B	7.47661e-154	0.386857	0.92	0.858	1.90407e-149	Surface.ectoderm
BPHL	1.48698e-153	0.350257	0.5	0.282	3.78688e-149	Surface.ectoderm
ZNF462	1.27433e-152	0.468445	0.885	0.804	3.24535e-148	Surface.ectoderm
SBK1	3.84843e-151	0.274563	0.335	0.151	9.80079e-147	Surface.ectoderm
LDOC1	7.57094e-151	0.314338	0.394	0.198	1.92809e-146	Surface.ectoderm
CTDSPL	9.02358e-149	0.41109	0.64	0.439	2.29803e-144	Surface.ectoderm
SGPL1	1.04676e-147	0.487299	0.401	0.216	2.66578e-143	Surface.ectoderm
ID2	2.01338e-147	0.71457	0.771	0.656	5.12748e-143	Surface.ectoderm
LOC108590331	2.79996e-147	0.369044	0.547	0.334	7.13066e-143	Surface.ectoderm
RCAN3	4.50004e-147	0.27104	0.315	0.14	1.14603e-142	Surface.ectoderm
IMMP2L	3.13506e-145	0.288814	0.313	0.14	7.98406e-141	Surface.ectoderm
CIRBP	3.35891e-145	0.302875	0.998	0.964	8.55413e-141	Surface.ectoderm
AMOTL2	1.11577e-144	0.486833	0.582	0.384	2.84154e-140	Surface.ectoderm
DYNLL2	2.99123e-144	0.391117	0.807	0.697	7.61777e-140	Surface.ectoderm
LOC108589472	1.25736e-143	0.451437	0.92	0.859	3.20211e-139	Surface.ectoderm
CD2AP	3.95741e-143	0.407982	0.691	0.524	1.00783e-138	Surface.ectoderm
THSD4	1.00468e-142	0.251368	0.257	0.103	2.55863e-138	Surface.ectoderm
CEP85L	1.00492e-142	0.4746	0.446	0.254	2.55924e-138	Surface.ectoderm
GNB5	1.55852e-142	0.298618	0.366	0.18	3.96909e-138	Surface.ectoderm
CCNG1	3.77401e-142	0.318035	0.967	0.922	9.61127e-138	Surface.ectoderm
SRD5A3	7.40572e-142	0.253096	0.294	0.128	1.88601e-137	Surface.ectoderm
ID1	1.21955e-141	0.475051	0.816	0.693	3.10584e-137	Surface.ectoderm
ZNF699	1.50674e-141	0.311956	0.366	0.181	3.83721e-137	Surface.ectoderm
SCAMP1	5.49718e-141	0.337683	0.483	0.274	1.39997e-136	Surface.ectoderm
ACTN1	8.13149e-140	0.38618	0.768	0.623	2.07085e-135	Surface.ectoderm
EPB41L4B	9.32925e-140	0.259399	0.241	0.095	2.37588e-135	Surface.ectoderm
APBB2	1.16409e-139	0.324406	0.401	0.208	2.9646e-135	Surface.ectoderm
EFNA4	1.94698e-139	0.30572	0.436	0.235	4.95836e-135	Surface.ectoderm
USP31	2.96962e-139	0.315399	0.362	0.18	7.56272e-135	Surface.ectoderm
PAIP2B	3.7293e-139	0.345048	0.498	0.286	9.4974e-135	Surface.ectoderm
CXXC5	7.29282e-139	0.364579	0.766	0.607	1.85726e-134	Surface.ectoderm
LAMC1	2.47452e-138	0.483769	0.791	0.677	6.30186e-134	Surface.ectoderm
ASNS	4.447e-138	0.281526	0.326	0.152	1.13252e-133	Surface.ectoderm
LOC100409595	1.32995e-137	0.316602	0.411	0.216	3.38699e-133	Surface.ectoderm
RPS15	1.34174e-137	0.266794	1	1	3.417e-133	Surface.ectoderm
LOC118151425	2.0179e-137	0.440594	0.774	0.649	5.13898e-133	Surface.ectoderm
FAM13A	8.04657e-137	0.37282	0.452	0.256	2.04922e-132	Surface.ectoderm
BCKDHB	3.5284e-136	0.308783	0.421	0.228	8.98577e-132	Surface.ectoderm
C1QTNF4	4.64875e-136	0.335637	0.497	0.288	1.1839e-131	Surface.ectoderm
RPS25	5.77677e-136	0.295002	1	1	1.47117e-131	Surface.ectoderm
SSR3	6.63381e-136	0.285499	0.999	0.989	1.68943e-131	Surface.ectoderm
SORT1	7.62014e-136	0.305555	0.439	0.238	1.94062e-131	Surface.ectoderm
DHDH	1.68711e-135	0.375647	0.537	0.33	4.29657e-131	Surface.ectoderm
BAIAP2L1	3.40418e-135	0.32819	0.471	0.266	8.66942e-131	Surface.ectoderm
SLC7A6	5.08143e-135	0.254107	0.254	0.105	1.29409e-130	Surface.ectoderm
KIAA1522	9.1881e-135	0.256826	0.315	0.145	2.33993e-130	Surface.ectoderm
GM2A	1.31009e-134	0.270355	0.338	0.162	3.33641e-130	Surface.ectoderm
ARHGEF3	2.17422e-134	0.313327	0.253	0.105	5.53709e-130	Surface.ectoderm
LUZP1	4.41701e-134	0.378755	0.771	0.647	1.12488e-129	Surface.ectoderm
DOCK9	5.1205e-133	0.271371	0.306	0.139	1.30404e-128	Surface.ectoderm
SUN1	1.35142e-132	0.301017	0.422	0.23	3.44167e-128	Surface.ectoderm
LYPD6	1.98336e-132	0.348151	0.297	0.138	5.05101e-128	Surface.ectoderm
ASCC3	6.51855e-132	0.343759	0.495	0.294	1.66008e-127	Surface.ectoderm
RPL35	6.96521e-132	0.282959	1	1	1.77383e-127	Surface.ectoderm
CD151	1.28431e-130	0.342818	0.795	0.681	3.27076e-126	Surface.ectoderm
LOC100401150	5.58114e-130	0.314387	0.99	0.973	1.42135e-125	Surface.ectoderm
DMD	5.93145e-130	0.265809	0.367	0.182	1.51056e-125	Surface.ectoderm
C1H9orf16	5.46762e-129	0.344071	0.816	0.713	1.39244e-124	Surface.ectoderm
BBX	1.19144e-126	0.431802	0.786	0.694	3.03424e-122	Surface.ectoderm
WSB1	3.34051e-126	0.375594	0.819	0.736	8.50728e-122	Surface.ectoderm
RPL30	5.05706e-126	0.262357	1	1	1.28788e-121	Surface.ectoderm
MYO6	5.34582e-126	0.296528	0.482	0.276	1.36142e-121	Surface.ectoderm
ETV3	1.17861e-123	0.262318	0.312	0.15	3.00157e-119	Surface.ectoderm
P2RX4	6.89416e-123	0.269902	0.345	0.174	1.75574e-118	Surface.ectoderm
ZFYVE21	6.30457e-122	0.301137	0.483	0.287	1.60558e-117	Surface.ectoderm
MINK1	8.84438e-122	0.301609	0.44	0.251	2.2524e-117	Surface.ectoderm
HSD11B1L	2.29769e-121	0.291802	0.395	0.215	5.85152e-117	Surface.ectoderm
ANXA5	3.89346e-121	0.290784	0.903	0.823	9.91548e-117	Surface.ectoderm
KIF13B	6.10345e-121	0.27841	0.294	0.139	1.55437e-116	Surface.ectoderm
TSTD1	9.22706e-121	0.323755	0.493	0.294	2.34985e-116	Surface.ectoderm
SYNE2	1.35534e-120	0.478478	0.922	0.844	3.45165e-116	Surface.ectoderm
COL4A5	6.98587e-120	0.281346	0.327	0.162	1.77909e-115	Surface.ectoderm
TUFT1	9.32222e-120	0.336941	0.404	0.226	2.37409e-115	Surface.ectoderm
ZNF704	1.72543e-119	0.450684	0.645	0.488	4.39414e-115	Surface.ectoderm
CERS6	3.30826e-119	0.342016	0.529	0.334	8.42515e-115	Surface.ectoderm
CRABP2	8.01907e-119	0.259356	0.928	0.755	2.04222e-114	Surface.ectoderm
PIK3R1	2.79894e-118	0.419007	0.519	0.327	7.12806e-114	Surface.ectoderm
EIF3L	1.4356e-117	0.261508	0.991	0.976	3.65605e-113	Surface.ectoderm
RPL32	2.33667e-117	0.31265	0.983	0.965	5.9508e-113	Surface.ectoderm
ARID3B	2.60067e-116	0.291314	0.524	0.321	6.62313e-112	Surface.ectoderm
FADS1	4.9591e-116	0.298111	0.98	0.954	1.26293e-111	Surface.ectoderm
APP	1.56746e-115	0.311564	0.972	0.94	3.99186e-111	Surface.ectoderm
PSAP	4.65587e-115	0.277359	0.785	0.669	1.18571e-110	Surface.ectoderm
AHDC1	6.20214e-115	0.285526	0.426	0.243	1.5795e-110	Surface.ectoderm
EIF4A2	1.09518e-114	0.276571	0.993	0.964	2.78911e-110	Surface.ectoderm
PTMA	1.35875e-114	0.250536	1	1	3.46034e-110	Surface.ectoderm
CDC42	1.45155e-114	0.27137	0.968	0.933	3.69667e-110	Surface.ectoderm
LOC100409675	2.86406e-114	0.325873	0.82	0.745	7.29389e-110	Surface.ectoderm
BLOC1S6	5.98884e-114	0.316645	0.539	0.349	1.52518e-109	Surface.ectoderm
DNAH7	1.90317e-113	0.278952	0.416	0.236	4.8468e-109	Surface.ectoderm
MGME1	7.39599e-113	0.276391	0.43	0.248	1.88354e-108	Surface.ectoderm
DDOST	2.42495e-112	0.27891	0.963	0.932	6.17562e-108	Surface.ectoderm
TRIP6	3.57807e-112	0.269369	0.425	0.242	9.11228e-108	Surface.ectoderm
IGSF9	8.56856e-112	0.309729	0.575	0.378	2.18216e-107	Surface.ectoderm
RPS3A	1.32624e-111	0.29041	0.991	0.98	3.37753e-107	Surface.ectoderm
GSE1	1.389e-108	0.297578	0.5	0.307	3.53737e-104	Surface.ectoderm
TFRC	3.33687e-108	0.417872	0.484	0.311	8.49802e-104	Surface.ectoderm
OLA1	1.11131e-107	0.385973	0.563	0.392	2.83018e-103	Surface.ectoderm
CHID1	1.42454e-106	0.281108	0.499	0.312	3.62788e-102	Surface.ectoderm
TMED3	4.25708e-106	0.296281	0.793	0.684	1.08415e-101	Surface.ectoderm
NAP1L5	4.99842e-106	0.365826	0.492	0.316	1.27295e-101	Surface.ectoderm
RPL39	1.83226e-105	0.25577	1	1	4.66622e-101	Surface.ectoderm
CTTNBP2	2.59466e-105	0.788508	0.724	0.649	6.60783e-101	Surface.ectoderm
PEBP1	8.68016e-105	0.260384	0.995	0.98	2.21058e-100	Surface.ectoderm
LOC100400790	5.77511e-104	0.275953	0.814	0.698	1.47075e-99	Surface.ectoderm
NEDD9	5.85393e-104	0.35865	0.47	0.286	1.49082e-99	Surface.ectoderm
WWC2	1.92495e-103	0.272967	0.519	0.325	4.90227e-99	Surface.ectoderm
ENTPD4	2.28506e-103	0.305304	0.354	0.197	5.81937e-99	Surface.ectoderm
PRDM4	3.74087e-103	0.26785	0.372	0.208	9.52688e-99	Surface.ectoderm
PTP4A1	8.22881e-103	0.324806	0.691	0.559	2.09563e-98	Surface.ectoderm
RNF145	1.90979e-102	0.547378	0.786	0.721	4.86366e-98	Surface.ectoderm
NOP53	1.9301e-102	0.260792	0.969	0.937	4.91538e-98	Surface.ectoderm
PDE4D	2.04935e-102	0.296254	0.424	0.248	5.21908e-98	Surface.ectoderm
LOC108593153	1.83582e-101	0.386163	0.712	0.587	4.67528e-97	Surface.ectoderm
PRTG	1.4238e-100	0.397444	0.985	0.925	3.62598e-96	Surface.ectoderm
MAST4	1.72191e-100	0.267368	0.382	0.217	4.3852e-96	Surface.ectoderm
LOC100409903	1.92566e-100	0.26366	0.963	0.928	4.90407e-96	Surface.ectoderm
ITGB5	3.50167e-100	0.302777	0.476	0.297	8.91769e-96	Surface.ectoderm
STK39	4.92566e-99	0.272141	0.417	0.241	1.25442e-94	Surface.ectoderm
VPS13A	9.35255e-99	0.290658	0.479	0.299	2.38181e-94	Surface.ectoderm
DHFR	1.53176e-98	0.384412	0.696	0.57	3.90095e-94	Surface.ectoderm
RPS9	2.1144e-98	0.254431	1	0.997	5.38474e-94	Surface.ectoderm
KIF1C	3.30873e-98	0.273176	0.41	0.242	8.42635e-94	Surface.ectoderm
SLC3A2	3.77801e-98	0.351783	0.64	0.5	9.62145e-94	Surface.ectoderm
RAB11FIP2	1.17336e-97	0.27607	0.352	0.197	2.98819e-93	Surface.ectoderm
DIAPH1	2.33387e-97	0.275533	0.446	0.272	5.94366e-93	Surface.ectoderm
SPRY2	3.74199e-97	0.283326	0.459	0.274	9.52973e-93	Surface.ectoderm
SMS	6.30594e-96	0.277405	0.938	0.874	1.60593e-91	Surface.ectoderm
MGST1	1.05652e-95	0.296871	0.496	0.312	2.69064e-91	Surface.ectoderm
ZNRF1	2.8211e-95	0.275314	0.495	0.319	7.18449e-91	Surface.ectoderm
ESYT2	1.28489e-94	0.281934	0.406	0.242	3.27224e-90	Surface.ectoderm
LOC118146891	3.16781e-94	0.270655	0.31	0.166	8.06747e-90	Surface.ectoderm
SPOPL	1.7319e-92	0.266077	0.386	0.227	4.41063e-88	Surface.ectoderm
AGO4	4.3719e-92	0.254448	0.37	0.214	1.11339e-87	Surface.ectoderm
CTTNBP2NL	6.69294e-92	0.270242	0.494	0.32	1.70449e-87	Surface.ectoderm
TBCA	2.17307e-91	0.293314	0.956	0.915	5.53415e-87	Surface.ectoderm
FAM136A	2.43968e-91	0.295215	0.773	0.681	6.21313e-87	Surface.ectoderm
ZDHHC21	3.14614e-91	0.254712	0.392	0.232	8.01228e-87	Surface.ectoderm
LOC100389231	3.78543e-91	0.295759	0.759	0.654	9.64037e-87	Surface.ectoderm
RPUSD3	7.99379e-91	0.259377	0.433	0.267	2.03578e-86	Surface.ectoderm
LOC100391571	1.62774e-90	0.287163	0.497	0.328	4.14537e-86	Surface.ectoderm
LOC100408222	2.37179e-90	0.295993	0.231	0.111	6.04024e-86	Surface.ectoderm
ACOT13	2.80647e-90	0.288779	0.817	0.738	7.14723e-86	Surface.ectoderm
SPTAN1	3.2238e-90	0.370741	0.759	0.685	8.21006e-86	Surface.ectoderm
ENSA	2.3667e-89	0.306195	0.739	0.649	6.02728e-85	Surface.ectoderm
LOC100402218	2.11881e-88	0.282729	0.849	0.78	5.39596e-84	Surface.ectoderm
LOC103791822	5.14769e-88	0.284551	0.388	0.232	1.31096e-83	Surface.ectoderm
LOC100398394	1.5182e-87	0.283517	0.498	0.329	3.86639e-83	Surface.ectoderm
BICD1	3.29366e-87	0.333218	0.57	0.41	8.38797e-83	Surface.ectoderm
FUNDC2	7.76598e-87	0.278576	0.818	0.735	1.97776e-82	Surface.ectoderm
NDUFS3	2.77335e-86	0.299253	0.747	0.661	7.0629e-82	Surface.ectoderm
LAMP2	8.20325e-86	0.258134	0.483	0.316	2.08912e-81	Surface.ectoderm
TMTC3	1.25821e-85	0.291668	0.508	0.345	3.20429e-81	Surface.ectoderm
N4BP2	2.78586e-85	0.33096	0.789	0.729	7.09474e-81	Surface.ectoderm
C7H1orf122	4.48658e-85	0.262676	0.484	0.319	1.1426e-80	Surface.ectoderm
LOC100394253	6.24008e-85	0.261091	0.909	0.873	1.58916e-80	Surface.ectoderm
LOC100401450	7.54515e-85	0.327318	0.79	0.705	1.92152e-80	Surface.ectoderm
MLEC	2.00424e-83	0.258659	0.981	0.966	5.1042e-79	Surface.ectoderm
TMEM165	2.32756e-83	0.283443	0.772	0.689	5.92761e-79	Surface.ectoderm
SELENOW	5.74285e-83	0.267773	0.865	0.805	1.46253e-78	Surface.ectoderm
CD320	3.39164e-81	0.279492	0.721	0.616	8.63749e-77	Surface.ectoderm
RABGAP1	1.87069e-80	0.253105	0.426	0.272	4.76409e-76	Surface.ectoderm
NDE1	9.65089e-79	0.255051	0.423	0.267	2.45779e-74	Surface.ectoderm
LYRM4	2.17051e-78	0.25911	0.847	0.794	5.52763e-74	Surface.ectoderm
SPRED1	3.75063e-78	0.266461	0.472	0.315	9.55173e-74	Surface.ectoderm
RBBP8	1.23284e-77	0.264922	0.543	0.384	3.13967e-73	Surface.ectoderm
GNG12	2.41427e-77	0.338558	0.528	0.38	6.14843e-73	Surface.ectoderm
LOC100386428	4.37101e-76	0.262706	0.451	0.298	1.11316e-71	Surface.ectoderm
ANKRD10	4.44034e-76	0.309542	0.706	0.626	1.13082e-71	Surface.ectoderm
CHMP2B	4.52133e-76	0.278758	0.594	0.454	1.15145e-71	Surface.ectoderm
CDYL	1.1816e-75	0.273267	0.503	0.348	3.00918e-71	Surface.ectoderm
RPL26	1.58085e-75	0.258476	0.899	0.869	4.02595e-71	Surface.ectoderm
TMEM256	1.21934e-74	0.290228	0.78	0.723	3.1053e-70	Surface.ectoderm
RAB18	2.52831e-74	0.257387	0.475	0.324	6.43884e-70	Surface.ectoderm
ATP2C1	5.02437e-74	0.261167	0.519	0.363	1.27956e-69	Surface.ectoderm
PRICKLE1	8.23155e-74	0.310046	0.333	0.2	2.09633e-69	Surface.ectoderm
MEIS1	1.0392e-73	0.376036	0.547	0.427	2.64653e-69	Surface.ectoderm
EIF2S3	2.95216e-73	0.250429	0.874	0.832	7.51827e-69	Surface.ectoderm
EDIL3	4.56261e-73	0.305115	0.277	0.154	1.16196e-68	Surface.ectoderm
DDI2	4.21894e-72	0.279661	0.468	0.321	1.07444e-67	Surface.ectoderm
LOC100894850	6.66752e-72	0.278393	0.899	0.87	1.69802e-67	Surface.ectoderm
ZC3HAV1	1.76854e-71	0.251299	0.474	0.321	4.50395e-67	Surface.ectoderm
LOC100413757	1.49958e-70	0.265968	0.814	0.762	3.81898e-66	Surface.ectoderm
RIN2	3.70073e-70	0.286651	0.325	0.196	9.42465e-66	Surface.ectoderm
ACTN4	1.01447e-69	0.279881	0.681	0.583	2.58355e-65	Surface.ectoderm
ARHGAP5	4.00368e-69	0.270985	0.867	0.829	1.01962e-64	Surface.ectoderm
RTN4	6.40066e-69	0.427337	0.873	0.86	1.63006e-64	Surface.ectoderm
ARMCX1	1.35835e-68	0.369069	0.595	0.484	3.45931e-64	Surface.ectoderm
RPL34	1.4152e-67	0.490548	0.886	0.861	3.60408e-63	Surface.ectoderm
LOC100403534	2.97694e-66	0.269989	0.537	0.397	7.58138e-62	Surface.ectoderm
FER	8.11101e-66	0.285037	0.653	0.553	2.06563e-61	Surface.ectoderm
TCF7L1	1.30291e-64	0.264981	0.563	0.424	3.31813e-60	Surface.ectoderm
RNASET2	1.41734e-63	0.320005	0.362	0.23	3.60955e-59	Surface.ectoderm
PODXL	1.87259e-63	0.415247	0.632	0.54	4.76892e-59	Surface.ectoderm
TCF4	1.01553e-62	0.263002	0.946	0.916	2.58625e-58	Surface.ectoderm
STAU2	2.71286e-61	0.253087	0.576	0.45	6.90883e-57	Surface.ectoderm
LIMCH1	8.60762e-60	0.321147	0.494	0.351	2.1921e-55	Surface.ectoderm
LOC108588627	3.04495e-59	0.291939	0.742	0.689	7.75458e-55	Surface.ectoderm
TLN2	1.57517e-58	0.291542	0.575	0.468	4.01147e-54	Surface.ectoderm
CREB3L2	3.06485e-58	0.301636	0.689	0.619	7.80525e-54	Surface.ectoderm
LBH	2.74882e-57	0.432045	0.336	0.224	7.00041e-53	Surface.ectoderm
LOC100412761	9.37359e-56	0.310659	0.52	0.403	2.38717e-51	Surface.ectoderm
LCA5	7.52019e-53	0.251421	0.693	0.614	1.91517e-48	Surface.ectoderm
LOC100393650	8.81214e-50	0.262812	0.662	0.591	2.24419e-45	Surface.ectoderm
LNPEP	5.31693e-47	0.292013	0.668	0.616	1.35406e-42	Surface.ectoderm
LOC103788504	3.18668e-44	0.263745	0.898	0.877	8.11552e-40	Surface.ectoderm
TNFRSF19	1.82167e-43	0.33414	0.425	0.323	4.63925e-39	Surface.ectoderm
DCN	3.9335e-42	0.813631	0.49	0.432	1.00175e-37	Surface.ectoderm
CAST	6.06588e-30	0.251097	0.619	0.561	1.5448e-25	Surface.ectoderm
HHIP	2.80763e-27	0.317146	0.308	0.224	7.15019e-23	Surface.ectoderm
IGFBP4	2.64728e-17	0.298896	0.734	0.885	6.74182e-13	Surface.ectoderm
HOXA7	1.05761e-16	0.286697	0.562	0.521	2.6934e-12	Surface.ectoderm
HOXA9	0.00525511	0.295437	0.549	0.599	1	Surface.ectoderm
FGF17	0	2.58071	0.779	0.055	0	Neuromesodermal.progenitor
LOC103794765	0	2.53645	0.919	0.367	0	Neuromesodermal.progenitor
PABPC1	0	2.45791	1	0.997	0	Neuromesodermal.progenitor
DKK1	0	2.43191	0.441	0.064	0	Neuromesodermal.progenitor
DLL1	0	2.30048	0.704	0.124	0	Neuromesodermal.progenitor
HOXC10	0	2.01456	0.883	0.1	0	Neuromesodermal.progenitor
RCN2	0	1.99246	0.997	0.858	0	Neuromesodermal.progenitor
SMC6	0	1.85763	0.962	0.783	0	Neuromesodermal.progenitor
HES7	0	1.8553	0.733	0.044	0	Neuromesodermal.progenitor
WNT5A	0	1.80093	0.983	0.495	0	Neuromesodermal.progenitor
LOC103793282	0	1.7859	0.916	0.154	0	Neuromesodermal.progenitor
GJA1	0	1.78	0.892	0.766	0	Neuromesodermal.progenitor
SPRY4	0	1.76632	0.864	0.092	0	Neuromesodermal.progenitor
CDX2	0	1.76132	0.886	0.389	0	Neuromesodermal.progenitor
CYP26A1	0	1.66874	0.54	0.077	0	Neuromesodermal.progenitor
HOXA10	0	1.66215	0.865	0.182	0	Neuromesodermal.progenitor
ARL4D	0	1.63641	0.572	0.132	0	Neuromesodermal.progenitor
HOXD4	0	1.62102	0.997	0.795	0	Neuromesodermal.progenitor
PPP1R14C	0	1.61493	0.701	0.057	0	Neuromesodermal.progenitor
RSPO3	0	1.60174	0.748	0.557	0	Neuromesodermal.progenitor
HOXC9	0	1.59663	0.954	0.468	0	Neuromesodermal.progenitor
MLLT3	0	1.58988	0.991	0.721	0	Neuromesodermal.progenitor
WNT5B	0	1.55308	0.776	0.209	0	Neuromesodermal.progenitor
HOXC4	0	1.53318	0.981	0.703	0	Neuromesodermal.progenitor
CACHD1	0	1.52454	0.934	0.488	0	Neuromesodermal.progenitor
PREX2	0	1.50028	0.93	0.484	0	Neuromesodermal.progenitor
LOC100411167	0	1.45016	0.879	0.577	0	Neuromesodermal.progenitor
PTK7	0	1.43715	0.931	0.461	0	Neuromesodermal.progenitor
HOXA3	0	1.43567	0.935	0.461	0	Neuromesodermal.progenitor
IL17RD	0	1.39614	0.809	0.144	0	Neuromesodermal.progenitor
HOXC8	0	1.39534	0.955	0.606	0	Neuromesodermal.progenitor
GREB1	0	1.38854	0.775	0.266	0	Neuromesodermal.progenitor
APLNR	0	1.38468	0.5	0.062	0	Neuromesodermal.progenitor
WNT3A	0	1.35239	0.534	0.038	0	Neuromesodermal.progenitor
HOXA9	0	1.33182	0.961	0.557	0	Neuromesodermal.progenitor
ABLIM1	0	1.32795	0.825	0.685	0	Neuromesodermal.progenitor
FGF3	0	1.31586	0.474	0.013	0	Neuromesodermal.progenitor
LIMCH1	0	1.31423	0.82	0.316	0	Neuromesodermal.progenitor
IGFBP4	0	1.29569	0.962	0.862	0	Neuromesodermal.progenitor
LIN28A	0	1.29285	0.967	0.885	0	Neuromesodermal.progenitor
CDX1	0	1.28938	0.767	0.12	0	Neuromesodermal.progenitor
SP8	0	1.25937	0.774	0.153	0	Neuromesodermal.progenitor
SPRY2	0	1.25676	0.779	0.24	0	Neuromesodermal.progenitor
CDH2	0	1.255	0.992	0.714	0	Neuromesodermal.progenitor
MEST	0	1.25336	0.962	0.868	0	Neuromesodermal.progenitor
EPHA4	0	1.24126	0.803	0.215	0	Neuromesodermal.progenitor
DLL3	0	1.23057	0.603	0.144	0	Neuromesodermal.progenitor
LOC118143648	0	1.21445	0.535	0.07	0	Neuromesodermal.progenitor
URAD	0	1.21368	0.676	0.116	0	Neuromesodermal.progenitor
EOGT	0	1.20135	0.726	0.149	0	Neuromesodermal.progenitor
HOXC6	0	1.19891	0.941	0.582	0	Neuromesodermal.progenitor
SERPINB9	0	1.17507	0.547	0.047	0	Neuromesodermal.progenitor
JARID2	0	1.15609	0.82	0.269	0	Neuromesodermal.progenitor
HOXB4	0	1.14886	0.959	0.637	0	Neuromesodermal.progenitor
HOXB3	0	1.13337	0.932	0.519	0	Neuromesodermal.progenitor
LOC118153609	0	1.13329	0.683	0.088	0	Neuromesodermal.progenitor
DSC3	0	1.12891	0.497	0.039	0	Neuromesodermal.progenitor
DLG1	0	1.11176	0.851	0.574	0	Neuromesodermal.progenitor
NKD1	0	1.09702	0.771	0.223	0	Neuromesodermal.progenitor
FGF8	0	1.09532	0.557	0.026	0	Neuromesodermal.progenitor
CPA6	0	1.09218	0.626	0.036	0	Neuromesodermal.progenitor
FZD10	0	1.08492	0.792	0.212	0	Neuromesodermal.progenitor
FNDC3A	0	1.08171	0.908	0.81	0	Neuromesodermal.progenitor
DSG2	0	1.07382	0.915	0.574	0	Neuromesodermal.progenitor
HOXD11	0	1.06914	0.436	0.044	0	Neuromesodermal.progenitor
STK39	0	1.05337	0.727	0.208	0	Neuromesodermal.progenitor
ZBTB16	0	1.05107	0.792	0.213	0	Neuromesodermal.progenitor
KIF26B	0	1.04424	0.803	0.26	0	Neuromesodermal.progenitor
CXCR4	0	1.03802	0.601	0.174	0	Neuromesodermal.progenitor
DAPK1	0	1.03351	0.792	0.268	0	Neuromesodermal.progenitor
LOC103794762	0	1.02488	0.824	0.429	0	Neuromesodermal.progenitor
TMEM121	0	1.02255	0.593	0.092	0	Neuromesodermal.progenitor
CCK	0	1.00584	0.272	0.019	0	Neuromesodermal.progenitor
LEF1	0	0.99677	0.965	0.745	0	Neuromesodermal.progenitor
SKAP2	0	0.995044	0.953	0.69	0	Neuromesodermal.progenitor
HOXA7	0	0.973059	0.78	0.498	0	Neuromesodermal.progenitor
DSP	0	0.972841	0.982	0.857	0	Neuromesodermal.progenitor
CRABP2	0	0.958328	0.994	0.747	0	Neuromesodermal.progenitor
PAGE4	0	0.955033	0.492	0.033	0	Neuromesodermal.progenitor
AXIN2	0	0.944194	0.706	0.219	0	Neuromesodermal.progenitor
SALL1	0	0.930527	0.897	0.503	0	Neuromesodermal.progenitor
TRPS1	0	0.923681	0.625	0.184	0	Neuromesodermal.progenitor
NKX1-2	0	0.919621	0.447	0.089	0	Neuromesodermal.progenitor
MAML3	0	0.914941	0.818	0.334	0	Neuromesodermal.progenitor
GXYLT1	0	0.912524	0.785	0.466	0	Neuromesodermal.progenitor
SPATA18	0	0.908074	0.352	0.025	0	Neuromesodermal.progenitor
CABLES1	0	0.901801	0.537	0.059	0	Neuromesodermal.progenitor
HOXB7	0	0.898299	0.829	0.494	0	Neuromesodermal.progenitor
DAP	0	0.891384	0.687	0.337	0	Neuromesodermal.progenitor
RBFOX1	0	0.888874	0.57	0.083	0	Neuromesodermal.progenitor
GREB1L	0	0.883627	0.723	0.336	0	Neuromesodermal.progenitor
PCSK1	0	0.869982	0.52	0.043	0	Neuromesodermal.progenitor
RASEF	0	0.865487	0.396	0.045	0	Neuromesodermal.progenitor
DUSP6	0	0.860184	0.91	0.582	0	Neuromesodermal.progenitor
NOTCH1	0	0.858702	0.748	0.262	0	Neuromesodermal.progenitor
HOXD10	0	0.854991	0.49	0.049	0	Neuromesodermal.progenitor
FGF4	0	0.843554	0.254	0.005	0	Neuromesodermal.progenitor
PAQR8	0	0.833645	0.676	0.243	0	Neuromesodermal.progenitor
ZIC2	0	0.832861	0.649	0.168	0	Neuromesodermal.progenitor
CPA2	0	0.832382	0.328	0.023	0	Neuromesodermal.progenitor
SMOC1	0	0.819945	0.885	0.456	0	Neuromesodermal.progenitor
NTM	0	0.819391	0.554	0.138	0	Neuromesodermal.progenitor
FGFR1	0	0.81458	0.974	0.827	0	Neuromesodermal.progenitor
PTPN5	0	0.808211	0.462	0.03	0	Neuromesodermal.progenitor
TBX6	0	0.805014	0.439	0.015	0	Neuromesodermal.progenitor
CNNM2	0	0.802023	0.518	0.081	0	Neuromesodermal.progenitor
COL13A1	0	0.801717	0.496	0.108	0	Neuromesodermal.progenitor
MMD	0	0.79431	0.598	0.263	0	Neuromesodermal.progenitor
HOXB2	0	0.788478	0.805	0.417	0	Neuromesodermal.progenitor
ADAMTS8	0	0.78287	0.298	0.012	0	Neuromesodermal.progenitor
LOC118149450	0	0.781229	0.527	0.057	0	Neuromesodermal.progenitor
MSGN1	0	0.776096	0.335	0.005	0	Neuromesodermal.progenitor
ARFGEF1	0	0.776028	0.749	0.448	0	Neuromesodermal.progenitor
BMP7	0	0.767506	0.662	0.179	0	Neuromesodermal.progenitor
SLC34A2	0	0.763677	0.287	0.018	0	Neuromesodermal.progenitor
PGRMC1	0	0.748803	0.99	0.895	0	Neuromesodermal.progenitor
LOC103795250	0	0.742432	0.606	0.206	0	Neuromesodermal.progenitor
RARG	0	0.742224	0.711	0.258	0	Neuromesodermal.progenitor
TMEFF1	0	0.733535	0.881	0.611	0	Neuromesodermal.progenitor
HOXD1	0	0.7316	0.522	0.055	0	Neuromesodermal.progenitor
ACTA2	0	0.730498	0.534	0.132	0	Neuromesodermal.progenitor
KLHL5	0	0.72863	0.77	0.422	0	Neuromesodermal.progenitor
OAF	0	0.710134	0.583	0.178	0	Neuromesodermal.progenitor
SALL4	0	0.707241	0.859	0.589	0	Neuromesodermal.progenitor
STT3B	0	0.707049	0.941	0.855	0	Neuromesodermal.progenitor
ODR4	0	0.705537	0.593	0.241	0	Neuromesodermal.progenitor
TMEM117	0	0.703561	0.504	0.036	0	Neuromesodermal.progenitor
CENPV	0	0.698421	0.992	0.874	0	Neuromesodermal.progenitor
MLEC	0	0.697378	0.993	0.965	0	Neuromesodermal.progenitor
TWF1	0	0.694303	0.625	0.216	0	Neuromesodermal.progenitor
VCAN	0	0.69256	0.989	0.802	0	Neuromesodermal.progenitor
TPR	0	0.690881	0.997	0.987	0	Neuromesodermal.progenitor
LOC103789410	0	0.686423	0.466	0.056	0	Neuromesodermal.progenitor
PLAGL2	0	0.680196	0.639	0.254	0	Neuromesodermal.progenitor
SALL3	0	0.679892	0.589	0.156	0	Neuromesodermal.progenitor
USP49	0	0.679116	0.543	0.17	0	Neuromesodermal.progenitor
ENO1	0	0.678008	1	0.984	0	Neuromesodermal.progenitor
LOC118153841	0	0.674704	0.524	0.154	0	Neuromesodermal.progenitor
SNAI1	0	0.673573	0.422	0.087	0	Neuromesodermal.progenitor
NAV1	0	0.673346	0.861	0.643	0	Neuromesodermal.progenitor
HMGN3	0	0.671877	0.984	0.901	0	Neuromesodermal.progenitor
APCDD1	0	0.669537	0.509	0.137	0	Neuromesodermal.progenitor
ALDOA	0	0.667318	0.958	0.879	0	Neuromesodermal.progenitor
ARID1A	0	0.666897	0.932	0.819	0	Neuromesodermal.progenitor
CCND1	0	0.663713	0.976	0.836	0	Neuromesodermal.progenitor
RAD21	0	0.660225	0.986	0.947	0	Neuromesodermal.progenitor
LOC103788721	0	0.659796	0.523	0.111	0	Neuromesodermal.progenitor
ENAH	0	0.653693	0.987	0.906	0	Neuromesodermal.progenitor
WNT8A	0	0.651859	0.299	0.008	0	Neuromesodermal.progenitor
SEMA6A	0	0.651641	0.859	0.602	0	Neuromesodermal.progenitor
LOC103796822	0	0.649303	0.493	0.18	0	Neuromesodermal.progenitor
KDM7A	0	0.646865	0.548	0.174	0	Neuromesodermal.progenitor
SMS	0	0.640353	0.971	0.871	0	Neuromesodermal.progenitor
ARID3B	0	0.631183	0.692	0.302	0	Neuromesodermal.progenitor
CDH11	0	0.629374	0.963	0.749	0	Neuromesodermal.progenitor
IGDCC3	0	0.627543	0.984	0.897	0	Neuromesodermal.progenitor
SLC16A2	0	0.62736	0.385	0.048	0	Neuromesodermal.progenitor
SOX2	0	0.62642	0.542	0.182	0	Neuromesodermal.progenitor
PCDH19	0	0.626071	0.252	0.053	0	Neuromesodermal.progenitor
SPRY1	0	0.624287	0.551	0.157	0	Neuromesodermal.progenitor
GALNT12	0	0.618195	0.478	0.147	0	Neuromesodermal.progenitor
NRXN2	0	0.617372	0.503	0.132	0	Neuromesodermal.progenitor
TRIM2	0	0.616515	0.701	0.357	0	Neuromesodermal.progenitor
LDLRAD3	0	0.616082	0.66	0.286	0	Neuromesodermal.progenitor
TPI1	0	0.615339	0.975	0.903	0	Neuromesodermal.progenitor
NPM3	0	0.614677	0.954	0.864	0	Neuromesodermal.progenitor
PCDH8	0	0.610649	0.156	0.025	0	Neuromesodermal.progenitor
LOC118147932	0	0.608994	0.459	0.058	0	Neuromesodermal.progenitor
TBCA	0	0.607195	0.978	0.912	0	Neuromesodermal.progenitor
PTMS	0	0.605566	1	0.958	0	Neuromesodermal.progenitor
SP5	0	0.601584	0.53	0.135	0	Neuromesodermal.progenitor
ANOS1	0	0.601109	0.31	0.047	0	Neuromesodermal.progenitor
MIXL1	0	0.595791	0.262	0.011	0	Neuromesodermal.progenitor
RAP2A	0	0.594409	0.546	0.198	0	Neuromesodermal.progenitor
ANKRD50	0	0.593992	0.592	0.24	0	Neuromesodermal.progenitor
HOXA1	0	0.593825	0.503	0.1	0	Neuromesodermal.progenitor
LOC100394084	0	0.589399	0.98	0.924	0	Neuromesodermal.progenitor
NPTX2	0	0.58929	0.381	0.061	0	Neuromesodermal.progenitor
PDE4D	0	0.584868	0.535	0.235	0	Neuromesodermal.progenitor
NASP	0	0.582221	0.998	0.974	0	Neuromesodermal.progenitor
AR	0	0.582169	0.583	0.245	0	Neuromesodermal.progenitor
GREM1	0	0.579615	0.404	0.081	0	Neuromesodermal.progenitor
HNRNPA3	0	0.579289	1	0.992	0	Neuromesodermal.progenitor
TM9SF4	0	0.57899	0.636	0.291	0	Neuromesodermal.progenitor
MAGI1	0	0.576872	0.661	0.301	0	Neuromesodermal.progenitor
LOC103795248	0	0.576264	0.532	0.142	0	Neuromesodermal.progenitor
ZDHHC18	0	0.574953	0.516	0.15	0	Neuromesodermal.progenitor
CNFN	0	0.569743	0.436	0.078	0	Neuromesodermal.progenitor
HOXD9	0	0.564512	0.552	0.149	0	Neuromesodermal.progenitor
FAM13B	0	0.561621	0.64	0.304	0	Neuromesodermal.progenitor
SLC38A1	0	0.56031	0.761	0.484	0	Neuromesodermal.progenitor
SIPA1L2	0	0.56007	0.747	0.38	0	Neuromesodermal.progenitor
CYSTM1	0	0.555004	0.448	0.084	0	Neuromesodermal.progenitor
LOC118143650	0	0.554949	0.424	0.056	0	Neuromesodermal.progenitor
IGSF3	0	0.554694	0.619	0.279	0	Neuromesodermal.progenitor
PKM	0	0.554321	0.991	0.939	0	Neuromesodermal.progenitor
PRICKLE1	0	0.554301	0.527	0.179	0	Neuromesodermal.progenitor
NOP56	0	0.553799	0.997	0.945	0	Neuromesodermal.progenitor
SLITRK5	0	0.553611	0.49	0.114	0	Neuromesodermal.progenitor
GALNT6	0	0.553072	0.385	0.05	0	Neuromesodermal.progenitor
LMAN1	0	0.550163	0.974	0.951	0	Neuromesodermal.progenitor
PPM1H	0	0.548826	0.443	0.088	0	Neuromesodermal.progenitor
DPP6	0	0.546947	0.465	0.122	0	Neuromesodermal.progenitor
PNO1	0	0.545903	0.712	0.425	0	Neuromesodermal.progenitor
SAA1	0	0.541126	0.233	0.005	0	Neuromesodermal.progenitor
FOXB1	0	0.539827	0.499	0.116	0	Neuromesodermal.progenitor
FGF10	0	0.535187	0.435	0.099	0	Neuromesodermal.progenitor
SPCS3	0	0.533594	0.967	0.898	0	Neuromesodermal.progenitor
TEX9	0	0.533098	0.545	0.203	0	Neuromesodermal.progenitor
AIF1L	0	0.533084	0.531	0.177	0	Neuromesodermal.progenitor
LOC103788720	0	0.531725	0.466	0.104	0	Neuromesodermal.progenitor
MCUB	0	0.531196	0.537	0.203	0	Neuromesodermal.progenitor
TMSB15B	0	0.527916	1	0.965	0	Neuromesodermal.progenitor
DIPK2A	0	0.525677	0.595	0.251	0	Neuromesodermal.progenitor
SMARCC1	0	0.525566	0.996	0.974	0	Neuromesodermal.progenitor
LRRCC1	0	0.524822	0.686	0.362	0	Neuromesodermal.progenitor
LY6G6D	0	0.523376	0.361	0.035	0	Neuromesodermal.progenitor
ANTXR1	0	0.523324	0.575	0.215	0	Neuromesodermal.progenitor
CDX4	0	0.519136	0.387	0.056	0	Neuromesodermal.progenitor
LOC103790783	0	0.517977	0.45	0.137	0	Neuromesodermal.progenitor
EVX1	0	0.517336	0.356	0.048	0	Neuromesodermal.progenitor
RMI1	0	0.516774	0.672	0.339	0	Neuromesodermal.progenitor
HOXC5	0	0.515452	0.491	0.13	0	Neuromesodermal.progenitor
PNN	0	0.51311	0.998	0.981	0	Neuromesodermal.progenitor
SGCB	0	0.511924	0.403	0.06	0	Neuromesodermal.progenitor
CRTAC1	0	0.510501	0.376	0.03	0	Neuromesodermal.progenitor
STK26	0	0.510366	0.582	0.226	0	Neuromesodermal.progenitor
ETV5	0	0.509471	0.504	0.148	0	Neuromesodermal.progenitor
ZNF711	0	0.508796	0.569	0.228	0	Neuromesodermal.progenitor
FYN	0	0.505894	0.578	0.216	0	Neuromesodermal.progenitor
TSEN2	0	0.505467	0.598	0.26	0	Neuromesodermal.progenitor
PARP8	0	0.499874	0.54	0.201	0	Neuromesodermal.progenitor
LOC108591710	0	0.498164	0.663	0.334	0	Neuromesodermal.progenitor
ANKRD46	0	0.496669	0.634	0.326	0	Neuromesodermal.progenitor
GDF11	0	0.495143	0.553	0.212	0	Neuromesodermal.progenitor
SINHCAF	0	0.493129	0.963	0.85	0	Neuromesodermal.progenitor
LRP4	0	0.490373	0.518	0.175	0	Neuromesodermal.progenitor
SH3PXD2B	0	0.489934	0.647	0.313	0	Neuromesodermal.progenitor
FILIP1L	0	0.489059	0.521	0.216	0	Neuromesodermal.progenitor
ADAMTS17	0	0.488221	0.392	0.059	0	Neuromesodermal.progenitor
FSCN1	0	0.48706	0.912	0.759	0	Neuromesodermal.progenitor
APOA4	0	0.487045	0.318	0.016	0	Neuromesodermal.progenitor
TMEM132C	0	0.485735	0.471	0.138	0	Neuromesodermal.progenitor
MMP15	0	0.485728	0.43	0.111	0	Neuromesodermal.progenitor
TLE3	0	0.48243	0.492	0.19	0	Neuromesodermal.progenitor
CITED1	0	0.480519	0.376	0.096	0	Neuromesodermal.progenitor
HTR3A	0	0.473402	0.314	0.017	0	Neuromesodermal.progenitor
DDAH1	0	0.472713	0.418	0.151	0	Neuromesodermal.progenitor
MGST2	0	0.470107	0.441	0.103	0	Neuromesodermal.progenitor
SPOCK2	0	0.467767	0.367	0.053	0	Neuromesodermal.progenitor
LOC118143651	0	0.467572	0.491	0.181	0	Neuromesodermal.progenitor
LOC100396934	0	0.457782	0.999	0.981	0	Neuromesodermal.progenitor
ERICH2	0	0.457146	0.574	0.258	0	Neuromesodermal.progenitor
RAP2C	0	0.455399	0.411	0.148	0	Neuromesodermal.progenitor
SET	0	0.450039	1	0.998	0	Neuromesodermal.progenitor
PSD3	0	0.44764	0.528	0.22	0	Neuromesodermal.progenitor
SHISAL2B	0	0.446581	0.378	0.088	0	Neuromesodermal.progenitor
TNMD	0	0.444681	0.231	0.009	0	Neuromesodermal.progenitor
GBX2	0	0.444588	0.309	0.041	0	Neuromesodermal.progenitor
HTRA1	0	0.442535	0.584	0.213	0	Neuromesodermal.progenitor
RASL11B	0	0.441127	0.531	0.215	0	Neuromesodermal.progenitor
DSC1	0	0.437193	0.29	0.032	0	Neuromesodermal.progenitor
CA14	0	0.435758	0.572	0.255	0	Neuromesodermal.progenitor
MYL4	0	0.429773	0.264	0.051	0	Neuromesodermal.progenitor
HSPB2	0	0.428953	0.293	0.063	0	Neuromesodermal.progenitor
BRI3BP	0	0.428149	0.528	0.221	0	Neuromesodermal.progenitor
SHF	0	0.425208	0.42	0.116	0	Neuromesodermal.progenitor
GPR19	0	0.42427	0.345	0.066	0	Neuromesodermal.progenitor
ADAM12	0	0.42398	0.572	0.221	0	Neuromesodermal.progenitor
GPC4	0	0.423469	0.354	0.06	0	Neuromesodermal.progenitor
HES6	0	0.422491	0.37	0.096	0	Neuromesodermal.progenitor
SP4	0	0.418499	0.496	0.207	0	Neuromesodermal.progenitor
LOC103789294	0	0.412671	0.308	0.037	0	Neuromesodermal.progenitor
RPL35	0	0.410916	1	1	0	Neuromesodermal.progenitor
HOXA2	0	0.408241	0.437	0.142	0	Neuromesodermal.progenitor
EGFLAM	0	0.407826	0.311	0.047	0	Neuromesodermal.progenitor
MNX1	0	0.404682	0.275	0.02	0	Neuromesodermal.progenitor
BACE2	0	0.402887	0.327	0.071	0	Neuromesodermal.progenitor
LOC100404768	0	0.401842	0.459	0.178	0	Neuromesodermal.progenitor
TNNC1	0	0.400583	0.297	0.058	0	Neuromesodermal.progenitor
ZIC3	0	0.400531	0.288	0.049	0	Neuromesodermal.progenitor
EPHA5	0	0.399855	0.259	0.041	0	Neuromesodermal.progenitor
CD8B	0	0.399068	0.255	0.009	0	Neuromesodermal.progenitor
HOXD8	0	0.392011	0.399	0.121	0	Neuromesodermal.progenitor
ZIC5	0	0.3843	0.353	0.092	0	Neuromesodermal.progenitor
NECAB2	0	0.383143	0.291	0.021	0	Neuromesodermal.progenitor
NDUFA4L2	0	0.380147	0.296	0.061	0	Neuromesodermal.progenitor
TMEM45A	0	0.378061	0.407	0.146	0	Neuromesodermal.progenitor
SP6	0	0.376227	0.315	0.056	0	Neuromesodermal.progenitor
F2R	0	0.375904	0.52	0.203	0	Neuromesodermal.progenitor
NEBL	0	0.375727	0.36	0.091	0	Neuromesodermal.progenitor
CA3	0	0.372612	0.234	0.024	0	Neuromesodermal.progenitor
ARHGAP24	0	0.368707	0.301	0.084	0	Neuromesodermal.progenitor
ETV4	0	0.366141	0.261	0.031	0	Neuromesodermal.progenitor
RELL1	0	0.356144	0.362	0.118	0	Neuromesodermal.progenitor
ADAMTS10	0	0.355984	0.361	0.103	0	Neuromesodermal.progenitor
UNC13C	0	0.354022	0.206	0.012	0	Neuromesodermal.progenitor
GDF1	0	0.354002	0.231	0.03	0	Neuromesodermal.progenitor
ECRG4	0	0.350971	0.294	0.062	0	Neuromesodermal.progenitor
CA13	0	0.349495	0.259	0.022	0	Neuromesodermal.progenitor
TSPAN15	0	0.347294	0.273	0.045	0	Neuromesodermal.progenitor
LRATD2	0	0.343042	0.282	0.06	0	Neuromesodermal.progenitor
THSD7B	0	0.338782	0.251	0.042	0	Neuromesodermal.progenitor
PDYN	0	0.335219	0.269	0.039	0	Neuromesodermal.progenitor
SLC7A3	0	0.329964	0.328	0.093	0	Neuromesodermal.progenitor
PAX3	0	0.325975	0.43	0.138	0	Neuromesodermal.progenitor
HOXB1	0	0.323667	0.274	0.056	0	Neuromesodermal.progenitor
TMEM233	0	0.320858	0.161	0.002	0	Neuromesodermal.progenitor
LOC100895916	0	0.318302	0.24	0.018	0	Neuromesodermal.progenitor
LOC118153449	0	0.315456	0.215	0.006	0	Neuromesodermal.progenitor
SKAP1	0	0.313058	0.248	0.041	0	Neuromesodermal.progenitor
EPCAM	0	0.312597	0.582	0.216	0	Neuromesodermal.progenitor
GALK2	0	0.308205	0.316	0.095	0	Neuromesodermal.progenitor
LOC118146941	0	0.306241	0.231	0.024	0	Neuromesodermal.progenitor
CPA5	0	0.30495	0.174	0.017	0	Neuromesodermal.progenitor
LOC103795249	0	0.301251	0.253	0.056	0	Neuromesodermal.progenitor
SLC24A2	0	0.300653	0.218	0.019	0	Neuromesodermal.progenitor
KLK14	0	0.29903	0.288	0.072	0	Neuromesodermal.progenitor
LPL	0	0.298749	0.212	0.017	0	Neuromesodermal.progenitor
LOC103795688	0	0.295136	0.264	0.062	0	Neuromesodermal.progenitor
TBXT	0	0.293465	0.203	0.008	0	Neuromesodermal.progenitor
SYT13	0	0.289302	0.262	0.066	0	Neuromesodermal.progenitor
MAPK4	0	0.283444	0.256	0.056	0	Neuromesodermal.progenitor
LOC118143807	0	0.277092	0.256	0.062	0	Neuromesodermal.progenitor
TTN	0	0.27306	0.139	0.016	0	Neuromesodermal.progenitor
ARID5A	0	0.269825	0.234	0.045	0	Neuromesodermal.progenitor
SYN3	0	0.264277	0.183	0.02	0	Neuromesodermal.progenitor
KCNK12	0	0.25963	0.224	0.045	0	Neuromesodermal.progenitor
SNX22	0	0.255893	0.172	0.017	0	Neuromesodermal.progenitor
CAMKV	0	0.25418	0.22	0.039	0	Neuromesodermal.progenitor
GATM	0	0.253767	0.208	0.032	0	Neuromesodermal.progenitor
LOC103791580	0	0.251972	0.202	0.042	0	Neuromesodermal.progenitor
GPRC5B	9.95254e-306	0.308827	0.313	0.094	2.53461e-301	Neuromesodermal.progenitor
LOC100396081	8.65066e-304	0.460424	0.569	0.268	2.20306e-299	Neuromesodermal.progenitor
PSIP1	2.74931e-303	0.484782	0.996	0.975	7.00167e-299	Neuromesodermal.progenitor
ITGA5	4.93273e-303	0.428189	0.475	0.194	1.25622e-298	Neuromesodermal.progenitor
DTWD1	1.68018e-302	0.352907	0.422	0.157	4.27891e-298	Neuromesodermal.progenitor
SNRPB	1.13504e-301	0.439659	0.995	0.966	2.89061e-297	Neuromesodermal.progenitor
NDFIP2	4.10391e-301	0.418461	0.478	0.201	1.04514e-296	Neuromesodermal.progenitor
GLUL	3.32243e-299	0.555723	0.848	0.674	8.46123e-295	Neuromesodermal.progenitor
MESD	4.39659e-297	0.447617	0.965	0.911	1.11968e-292	Neuromesodermal.progenitor
TIMP3	1.77079e-295	0.653244	0.516	0.233	4.50968e-291	Neuromesodermal.progenitor
HOXA4	2.14156e-294	0.281103	0.291	0.085	5.45392e-290	Neuromesodermal.progenitor
JAG1	4.9537e-294	0.383162	0.626	0.293	1.26156e-289	Neuromesodermal.progenitor
BMP1	1.3356e-292	0.386964	0.486	0.202	3.40138e-288	Neuromesodermal.progenitor
EIF4EBP2	2.17031e-291	0.469441	0.938	0.854	5.52714e-287	Neuromesodermal.progenitor
PAM	4.34726e-291	0.452699	0.612	0.302	1.10712e-286	Neuromesodermal.progenitor
PTMA	1.71567e-288	0.339539	1	1	4.36931e-284	Neuromesodermal.progenitor
SLC4A8	3.40782e-287	0.269142	0.249	0.065	8.6787e-283	Neuromesodermal.progenitor
PTPRK	1.30097e-286	0.416755	0.551	0.254	3.31317e-282	Neuromesodermal.progenitor
SEMA4D	2.77575e-286	0.44053	0.505	0.221	7.06899e-282	Neuromesodermal.progenitor
HDHD5	1.57666e-285	0.426409	0.533	0.244	4.01528e-281	Neuromesodermal.progenitor
DYNC1I1	2.91333e-285	0.276872	0.237	0.061	7.41937e-281	Neuromesodermal.progenitor
IGF2R	3.6198e-285	0.617873	0.728	0.484	9.21855e-281	Neuromesodermal.progenitor
SRRM1	9.2958e-285	0.390793	0.998	0.987	2.36736e-280	Neuromesodermal.progenitor
ACTC1	9.78328e-284	0.315503	0.188	0.039	2.49151e-279	Neuromesodermal.progenitor
PDIA6	9.58059e-282	0.390854	1	0.992	2.43989e-277	Neuromesodermal.progenitor
SEPTIN6	1.00383e-280	0.449914	0.63	0.319	2.55645e-276	Neuromesodermal.progenitor
MTSS1	4.50419e-280	0.510451	0.553	0.271	1.14708e-275	Neuromesodermal.progenitor
CHRDL1	6.14972e-280	0.337549	0.358	0.124	1.56615e-275	Neuromesodermal.progenitor
STEAP1	1.39898e-279	0.330631	0.331	0.111	3.56277e-275	Neuromesodermal.progenitor
C9H12orf75	8.84282e-279	0.351467	0.442	0.177	2.252e-274	Neuromesodermal.progenitor
GNAI2	7.98836e-276	0.402452	0.979	0.927	2.0344e-271	Neuromesodermal.progenitor
FOXH1	9.19152e-276	0.316254	0.268	0.077	2.3408e-271	Neuromesodermal.progenitor
VAMP5	1.16285e-275	0.267091	0.283	0.083	2.96143e-271	Neuromesodermal.progenitor
SERPINB1	4.29564e-275	0.432555	0.528	0.248	1.09397e-270	Neuromesodermal.progenitor
SORCS1	6.46055e-275	0.433499	0.381	0.141	1.64531e-270	Neuromesodermal.progenitor
KIF2A	8.34199e-275	0.477339	0.927	0.841	2.12446e-270	Neuromesodermal.progenitor
TNRC6B	5.33082e-274	0.541038	0.968	0.921	1.3576e-269	Neuromesodermal.progenitor
SLC16A14	2.48484e-273	0.259032	0.253	0.069	6.32815e-269	Neuromesodermal.progenitor
LOC103796114	2.78488e-273	0.365477	0.404	0.155	7.09226e-269	Neuromesodermal.progenitor
HOXD3	1.63053e-272	0.272387	0.284	0.085	4.15248e-268	Neuromesodermal.progenitor
ZNRF3	1.22457e-271	0.354975	0.516	0.227	3.1186e-267	Neuromesodermal.progenitor
SEC62	4.50132e-271	0.409119	0.992	0.976	1.14635e-266	Neuromesodermal.progenitor
CNMD	1.64436e-269	0.264713	0.267	0.077	4.1877e-265	Neuromesodermal.progenitor
TSPAN6	1.62973e-268	0.491936	0.91	0.808	4.15043e-264	Neuromesodermal.progenitor
INPP5F	4.06644e-268	0.394155	0.562	0.27	1.0356e-263	Neuromesodermal.progenitor
STOX1	4.52283e-267	0.321603	0.343	0.12	1.15183e-262	Neuromesodermal.progenitor
TRIP10	1.35096e-265	0.345291	0.377	0.143	3.44049e-261	Neuromesodermal.progenitor
PYGB	3.23478e-265	0.277707	0.296	0.094	8.23803e-261	Neuromesodermal.progenitor
OBSCN	3.42242e-265	0.252669	0.252	0.07	8.71588e-261	Neuromesodermal.progenitor
INKA1	7.80045e-265	0.348072	0.327	0.112	1.98654e-260	Neuromesodermal.progenitor
UCHL1	1.14427e-264	0.48444	0.721	0.441	2.91412e-260	Neuromesodermal.progenitor
HOXA6	7.05855e-264	0.27044	0.245	0.068	1.7976e-259	Neuromesodermal.progenitor
LHPP	1.37512e-263	0.392769	0.461	0.201	3.50201e-259	Neuromesodermal.progenitor
LOC100391263	3.60204e-263	0.391047	0.549	0.26	9.17331e-259	Neuromesodermal.progenitor
TMEM59L	5.76175e-263	0.272674	0.283	0.086	1.46734e-258	Neuromesodermal.progenitor
APELA	9.39134e-262	0.345334	0.255	0.073	2.39169e-257	Neuromesodermal.progenitor
DNMT3B	1.27724e-261	0.303484	0.347	0.124	3.25276e-257	Neuromesodermal.progenitor
DEK	1.4606e-261	0.417896	0.997	0.98	3.7197e-257	Neuromesodermal.progenitor
CPSF6	1.91847e-261	0.447993	0.929	0.842	4.88576e-257	Neuromesodermal.progenitor
PYGO1	6.04549e-261	0.397476	0.596	0.293	1.53961e-256	Neuromesodermal.progenitor
KIT	2.53712e-259	0.316418	0.471	0.196	6.4613e-255	Neuromesodermal.progenitor
LOC103791527	2.8506e-259	0.400669	0.561	0.274	7.25961e-255	Neuromesodermal.progenitor
EDA2R	3.41878e-259	0.256475	0.199	0.047	8.70662e-255	Neuromesodermal.progenitor
G3BP1	1.04769e-258	0.41285	0.99	0.954	2.66816e-254	Neuromesodermal.progenitor
CPXM1	3.25411e-258	0.415592	0.638	0.333	8.28725e-254	Neuromesodermal.progenitor
ENHO	9.7413e-258	0.298313	0.324	0.112	2.48082e-253	Neuromesodermal.progenitor
FKBP5	1.5083e-257	0.515172	0.845	0.68	3.84119e-253	Neuromesodermal.progenitor
MPP2	1.88024e-257	0.266027	0.283	0.088	4.7884e-253	Neuromesodermal.progenitor
DSC2	8.55695e-257	0.502981	0.723	0.46	2.1792e-252	Neuromesodermal.progenitor
HMGN1	1.33268e-256	0.330174	1	0.999	3.39393e-252	Neuromesodermal.progenitor
HACD1	9.89015e-254	0.311562	0.369	0.139	2.51873e-249	Neuromesodermal.progenitor
NRP2	3.35213e-252	0.482076	0.928	0.776	8.53686e-248	Neuromesodermal.progenitor
SLC20A1	6.11712e-252	0.397039	0.593	0.301	1.55785e-247	Neuromesodermal.progenitor
HMGN2	8.37382e-252	0.496098	0.944	0.868	2.13256e-247	Neuromesodermal.progenitor
CECR2	1.58571e-251	0.4965	0.832	0.651	4.03834e-247	Neuromesodermal.progenitor
ITGB8	8.88978e-251	0.354634	0.506	0.217	2.26396e-246	Neuromesodermal.progenitor
ATP6V1G2	6.113e-250	0.273592	0.27	0.083	1.5568e-245	Neuromesodermal.progenitor
LOC103791986	1.30689e-249	0.307866	0.362	0.136	3.32826e-245	Neuromesodermal.progenitor
SOX11	7.18728e-249	0.456628	0.896	0.748	1.83038e-244	Neuromesodermal.progenitor
MARCKSL1	1.74442e-248	0.38826	1	0.944	4.44251e-244	Neuromesodermal.progenitor
C21H21orf91	1.94385e-248	0.366992	0.469	0.21	4.95041e-244	Neuromesodermal.progenitor
TSTD1	3.74322e-247	0.396259	0.571	0.285	9.53286e-243	Neuromesodermal.progenitor
MSH2	1.342e-244	0.457253	0.893	0.768	3.41767e-240	Neuromesodermal.progenitor
CHN1	2.01082e-244	0.326667	0.417	0.173	5.12096e-240	Neuromesodermal.progenitor
MBOAT2	4.68521e-244	0.314991	0.373	0.144	1.19318e-239	Neuromesodermal.progenitor
AOPEP	1.96286e-243	0.349602	0.441	0.19	4.99882e-239	Neuromesodermal.progenitor
RANBP1	3.61545e-243	0.397165	0.988	0.946	9.20747e-239	Neuromesodermal.progenitor
FBXW4	1.45343e-242	0.404586	0.577	0.296	3.70145e-238	Neuromesodermal.progenitor
DDX46	2.03097e-242	0.406277	0.978	0.947	5.17227e-238	Neuromesodermal.progenitor
SIX4	1.23578e-239	0.351832	0.448	0.196	3.14716e-235	Neuromesodermal.progenitor
ATP1A1	1.85039e-238	0.444621	0.908	0.822	4.71239e-234	Neuromesodermal.progenitor
SFXN1	1.78413e-237	0.397223	0.617	0.332	4.54364e-233	Neuromesodermal.progenitor
BPHL	2.03759e-237	0.369373	0.552	0.275	5.18913e-233	Neuromesodermal.progenitor
MTX2	3.15004e-237	0.377407	0.592	0.311	8.0222e-233	Neuromesodermal.progenitor
ANP32E	3.40075e-236	0.466729	0.96	0.891	8.66069e-232	Neuromesodermal.progenitor
PGAM1	9.28778e-236	0.404555	0.933	0.853	2.36532e-231	Neuromesodermal.progenitor
DBN1	2.84884e-235	0.474782	0.887	0.757	7.25514e-231	Neuromesodermal.progenitor
ZC3H6	2.96893e-235	0.398865	0.559	0.283	7.56098e-231	Neuromesodermal.progenitor
SH3PXD2A	1.96011e-234	0.387134	0.57	0.287	4.99182e-230	Neuromesodermal.progenitor
RNF122	2.32941e-234	0.263074	0.259	0.081	5.93231e-230	Neuromesodermal.progenitor
CDH24	9.6893e-234	0.25267	0.277	0.09	2.46757e-229	Neuromesodermal.progenitor
CHCHD7	1.21129e-233	0.360983	0.477	0.222	3.0848e-229	Neuromesodermal.progenitor
CEMIP2	1.34567e-233	0.346735	0.55	0.267	3.42702e-229	Neuromesodermal.progenitor
KMT2A	1.93069e-233	0.501965	0.948	0.887	4.91689e-229	Neuromesodermal.progenitor
ADGRA3	2.76417e-233	0.397685	0.626	0.334	7.03951e-229	Neuromesodermal.progenitor
PCMTD1	2.96429e-233	0.403584	0.479	0.227	7.54916e-229	Neuromesodermal.progenitor
LOC100390360	1.10309e-232	0.379586	0.59	0.311	2.80923e-228	Neuromesodermal.progenitor
HOXB9	6.17117e-232	0.404124	0.883	0.638	1.57161e-227	Neuromesodermal.progenitor
YBX1	1.38107e-230	0.282034	1	1	3.51717e-226	Neuromesodermal.progenitor
AK4	1.51329e-230	0.324916	0.377	0.15	3.8539e-226	Neuromesodermal.progenitor
JAM3	1.92669e-230	0.662866	0.708	0.489	4.90671e-226	Neuromesodermal.progenitor
CNPY1	3.08707e-230	0.278982	0.303	0.106	7.86184e-226	Neuromesodermal.progenitor
CALM2	3.31164e-230	0.393123	1	0.995	8.43374e-226	Neuromesodermal.progenitor
MEX3B	7.97953e-230	0.313637	0.415	0.175	2.03215e-225	Neuromesodermal.progenitor
PCYOX1	9.90105e-229	0.32569	0.384	0.158	2.5215e-224	Neuromesodermal.progenitor
SYCE1L	1.01562e-228	0.258903	0.263	0.084	2.58649e-224	Neuromesodermal.progenitor
LOC103790910	1.03038e-228	0.265285	0.29	0.099	2.62408e-224	Neuromesodermal.progenitor
EIF4G2	1.61025e-228	0.372682	0.999	0.992	4.10081e-224	Neuromesodermal.progenitor
LOC100393869	2.25869e-228	0.502794	0.805	0.626	5.75221e-224	Neuromesodermal.progenitor
TCEA3	4.02995e-227	0.420986	0.481	0.232	1.02631e-222	Neuromesodermal.progenitor
NPTN	5.52698e-227	0.391512	0.53	0.266	1.40756e-222	Neuromesodermal.progenitor
TMTC4	6.81264e-227	0.288221	0.375	0.151	1.73497e-222	Neuromesodermal.progenitor
FBXO21	2.32566e-226	0.399307	0.568	0.301	5.92277e-222	Neuromesodermal.progenitor
KNOP1	4.49373e-226	0.403009	0.887	0.77	1.14442e-221	Neuromesodermal.progenitor
EIF4A2	5.48755e-225	0.350906	0.993	0.964	1.39752e-220	Neuromesodermal.progenitor
HOMER3	8.82699e-225	0.353042	0.57	0.29	2.24797e-220	Neuromesodermal.progenitor
PCOLCE2	1.79766e-224	0.278559	0.267	0.088	4.57809e-220	Neuromesodermal.progenitor
TAC3	1.022e-223	0.28735	0.383	0.154	2.60273e-219	Neuromesodermal.progenitor
POFUT1	1.61889e-223	0.388381	0.524	0.266	4.12283e-219	Neuromesodermal.progenitor
ITPR1	3.8049e-223	0.384277	0.493	0.235	9.68995e-219	Neuromesodermal.progenitor
SERPINH1	2.39734e-222	0.369598	0.987	0.917	6.1053e-218	Neuromesodermal.progenitor
FAM161A	2.88496e-222	0.366877	0.577	0.303	7.34712e-218	Neuromesodermal.progenitor
ARL6IP6	9.36892e-222	0.365952	0.585	0.311	2.38598e-217	Neuromesodermal.progenitor
SESTD1	3.27891e-221	0.367983	0.545	0.277	8.3504e-217	Neuromesodermal.progenitor
H2AFY2	1.91139e-220	0.41986	0.84	0.675	4.86773e-216	Neuromesodermal.progenitor
NSD3	1.80547e-219	0.375218	0.978	0.951	4.598e-215	Neuromesodermal.progenitor
SLC41A1	3.53812e-218	0.277219	0.327	0.123	9.01052e-214	Neuromesodermal.progenitor
HDAC2	1.22444e-217	0.368021	0.975	0.927	3.11828e-213	Neuromesodermal.progenitor
FSTL1	1.99069e-217	0.383438	0.978	0.897	5.0697e-213	Neuromesodermal.progenitor
LCAT	1.60265e-216	0.291092	0.342	0.134	4.08147e-212	Neuromesodermal.progenitor
BTG2	3.75717e-216	0.358589	0.527	0.258	9.56837e-212	Neuromesodermal.progenitor
GALNT14	6.17344e-216	0.409059	0.218	0.066	1.57219e-211	Neuromesodermal.progenitor
PHC2	1.10237e-214	0.365714	0.631	0.349	2.80741e-210	Neuromesodermal.progenitor
SRSF7	1.68789e-214	0.35157	0.994	0.97	4.29854e-210	Neuromesodermal.progenitor
DACH1	2.54546e-214	0.394162	0.571	0.296	6.48252e-210	Neuromesodermal.progenitor
SLC16A3	2.95803e-214	0.310744	0.576	0.29	7.53322e-210	Neuromesodermal.progenitor
NELL2	3.58031e-214	0.283511	0.455	0.201	9.11797e-210	Neuromesodermal.progenitor
PNISR	5.98145e-214	0.373372	0.994	0.967	1.5233e-209	Neuromesodermal.progenitor
EPB41	3.51185e-213	0.409425	0.903	0.798	8.94363e-209	Neuromesodermal.progenitor
IPO5	9.37598e-213	0.371163	0.984	0.937	2.38778e-208	Neuromesodermal.progenitor
CDH13	1.96546e-212	0.305849	0.35	0.137	5.00543e-208	Neuromesodermal.progenitor
LOC108593153	2.05362e-212	0.548937	0.755	0.582	5.22996e-208	Neuromesodermal.progenitor
LRIG1	2.87783e-212	0.255371	0.526	0.242	7.32897e-208	Neuromesodermal.progenitor
USP28	4.1955e-212	0.365982	0.615	0.342	1.06847e-207	Neuromesodermal.progenitor
GPR63	6.99848e-212	0.292921	0.386	0.163	1.7823e-207	Neuromesodermal.progenitor
LUC7L3	1.17077e-211	0.350454	0.991	0.962	2.98161e-207	Neuromesodermal.progenitor
NUCKS1	1.29235e-211	0.355552	1	0.998	3.29122e-207	Neuromesodermal.progenitor
DENND5A	1.35228e-211	0.344171	0.505	0.252	3.44386e-207	Neuromesodermal.progenitor
ABL2	5.68689e-211	0.32475	0.438	0.2	1.44828e-206	Neuromesodermal.progenitor
ENC1	1.62061e-210	0.309895	0.583	0.297	4.1272e-206	Neuromesodermal.progenitor
SMC3	2.84556e-210	0.385241	0.992	0.97	7.24679e-206	Neuromesodermal.progenitor
SMARCA5	3.82727e-210	0.347008	0.998	0.989	9.74691e-206	Neuromesodermal.progenitor
PRKDC	3.85863e-210	0.37776	0.997	0.984	9.82677e-206	Neuromesodermal.progenitor
KIF3A	9.68258e-210	0.415446	0.819	0.662	2.46586e-205	Neuromesodermal.progenitor
SMC1A	1.71617e-209	0.48344	0.921	0.84	4.37057e-205	Neuromesodermal.progenitor
ARGLU1	2.06711e-209	0.366504	0.992	0.975	5.26431e-205	Neuromesodermal.progenitor
IGF2BP1	2.07178e-209	0.362602	0.997	0.974	5.2762e-205	Neuromesodermal.progenitor
EFNA4	2.59405e-209	0.339922	0.474	0.229	6.60626e-205	Neuromesodermal.progenitor
TM7SF3	7.61243e-209	0.418026	0.515	0.269	1.93866e-204	Neuromesodermal.progenitor
TACC2	9.36729e-209	0.278408	0.342	0.135	2.38557e-204	Neuromesodermal.progenitor
CIB2	1.12813e-208	0.36474	0.654	0.377	2.87301e-204	Neuromesodermal.progenitor
WNK3	2.0171e-208	0.357544	0.614	0.334	5.13695e-204	Neuromesodermal.progenitor
ITFG1	2.29564e-208	0.359016	0.615	0.343	5.8463e-204	Neuromesodermal.progenitor
RAD50	6.84729e-208	0.424977	0.932	0.853	1.7438e-203	Neuromesodermal.progenitor
MATR3	8.0977e-208	0.33839	0.998	0.993	2.06224e-203	Neuromesodermal.progenitor
ANP32A	9.83588e-208	0.352019	0.992	0.974	2.5049e-203	Neuromesodermal.progenitor
DCUN1D4	1.02904e-207	0.325992	0.445	0.207	2.62067e-203	Neuromesodermal.progenitor
PARP1	5.55294e-207	0.369653	0.972	0.928	1.41417e-202	Neuromesodermal.progenitor
WDHD1	8.9689e-207	0.363785	0.545	0.281	2.28411e-202	Neuromesodermal.progenitor
ST3GAL4	2.78315e-206	0.285849	0.318	0.123	7.08784e-202	Neuromesodermal.progenitor
SH3D19	3.30799e-206	0.251099	0.28	0.098	8.42445e-202	Neuromesodermal.progenitor
HLTF	9.24019e-206	0.387265	0.591	0.323	2.3532e-201	Neuromesodermal.progenitor
KIF5C	1.28096e-205	0.35535	0.453	0.209	3.26222e-201	Neuromesodermal.progenitor
CNTNAP2	4.93708e-204	0.29283	0.323	0.125	1.25733e-199	Neuromesodermal.progenitor
ZNF727	2.6413e-203	0.379946	0.629	0.363	6.72659e-199	Neuromesodermal.progenitor
UBE2S	7.70077e-203	0.734228	0.839	0.724	1.96115e-198	Neuromesodermal.progenitor
YAF2	5.74611e-202	0.353529	0.565	0.304	1.46336e-197	Neuromesodermal.progenitor
LOC100405400	6.26003e-202	0.350851	0.579	0.311	1.59424e-197	Neuromesodermal.progenitor
CENPX	1.40639e-201	0.414321	0.641	0.388	3.58165e-197	Neuromesodermal.progenitor
MFAP2	1.50102e-201	0.412982	0.929	0.825	3.82265e-197	Neuromesodermal.progenitor
WDR54	1.88269e-201	0.308973	0.453	0.215	4.79465e-197	Neuromesodermal.progenitor
TMX4	2.21479e-201	0.327594	0.476	0.232	5.64041e-197	Neuromesodermal.progenitor
SCAPER	6.90135e-201	0.361581	0.547	0.291	1.75757e-196	Neuromesodermal.progenitor
SRSF11	1.03176e-200	0.342175	0.984	0.959	2.62757e-196	Neuromesodermal.progenitor
HMGA2	3.9924e-199	0.312446	0.999	0.962	1.01674e-194	Neuromesodermal.progenitor
EDN3	6.81445e-199	0.479341	0.257	0.091	1.73544e-194	Neuromesodermal.progenitor
EZH2	6.8646e-199	0.41316	0.898	0.789	1.74821e-194	Neuromesodermal.progenitor
UBB	1.13333e-198	0.322476	1	0.999	2.88625e-194	Neuromesodermal.progenitor
HIVEP1	2.70178e-198	0.354732	0.608	0.338	6.88063e-194	Neuromesodermal.progenitor
KBTBD11	2.91341e-198	0.271713	0.308	0.117	7.41959e-194	Neuromesodermal.progenitor
CACNA2D1	3.06167e-198	0.280436	0.346	0.141	7.79714e-194	Neuromesodermal.progenitor
KRTCAP3	2.83397e-197	0.276255	0.341	0.139	7.21727e-193	Neuromesodermal.progenitor
SERBP1	1.63031e-196	0.263313	1	0.999	4.15192e-192	Neuromesodermal.progenitor
DCBLD2	6.45234e-195	0.394257	0.828	0.656	1.64322e-190	Neuromesodermal.progenitor
DCTN1	1.25055e-194	0.382881	0.623	0.371	3.18479e-190	Neuromesodermal.progenitor
TRIM24	2.41555e-194	0.449713	0.8	0.671	6.15167e-190	Neuromesodermal.progenitor
RAC3	5.87247e-194	0.326991	0.537	0.281	1.49554e-189	Neuromesodermal.progenitor
PSMB10	3.78038e-193	0.343014	0.538	0.287	9.6275e-189	Neuromesodermal.progenitor
TMEM230	1.24597e-192	0.361533	0.892	0.807	3.17311e-188	Neuromesodermal.progenitor
ZRANB2	4.65375e-192	0.332138	0.985	0.94	1.18517e-187	Neuromesodermal.progenitor
SOCS7	8.28048e-192	0.323275	0.452	0.222	2.10879e-187	Neuromesodermal.progenitor
UGT8	9.68888e-191	0.260114	0.282	0.104	2.46747e-186	Neuromesodermal.progenitor
PDE3B	9.84566e-191	0.303589	0.412	0.189	2.50739e-186	Neuromesodermal.progenitor
MESP1	1.90026e-190	0.883222	0.286	0.113	4.83939e-186	Neuromesodermal.progenitor
SUPT16H	2.24727e-190	0.354756	0.988	0.96	5.72311e-186	Neuromesodermal.progenitor
BEX1	3.81025e-190	0.374776	0.97	0.887	9.70357e-186	Neuromesodermal.progenitor
GNAL	3.96332e-190	0.293144	0.354	0.151	1.00934e-185	Neuromesodermal.progenitor
PPME1	6.25029e-190	0.336293	0.545	0.296	1.59176e-185	Neuromesodermal.progenitor
PIK3R3	6.6893e-190	0.304183	0.405	0.186	1.70356e-185	Neuromesodermal.progenitor
B3GALNT2	7.18145e-190	0.334479	0.536	0.285	1.8289e-185	Neuromesodermal.progenitor
TMEM181	5.33268e-189	0.363835	0.669	0.419	1.35807e-184	Neuromesodermal.progenitor
COPS2	1.02983e-188	0.374832	0.901	0.826	2.62267e-184	Neuromesodermal.progenitor
HOXA5	1.31821e-188	0.665426	0.671	0.498	3.35709e-184	Neuromesodermal.progenitor
QDPR	3.19633e-188	0.506437	0.794	0.68	8.14008e-184	Neuromesodermal.progenitor
USP31	3.32785e-188	0.284855	0.391	0.176	8.47504e-184	Neuromesodermal.progenitor
HMGB3	2.05267e-187	0.450774	0.926	0.844	5.22754e-183	Neuromesodermal.progenitor
ALMS1	2.63796e-187	0.349131	0.547	0.297	6.7181e-183	Neuromesodermal.progenitor
PDE5A	2.88942e-187	0.350236	0.563	0.305	7.35849e-183	Neuromesodermal.progenitor
HNRNPD	2.95324e-187	0.311347	1	0.994	7.52103e-183	Neuromesodermal.progenitor
PCLAF	9.67218e-187	0.57066	0.646	0.431	2.46321e-182	Neuromesodermal.progenitor
ERC1	1.21048e-185	0.376044	0.568	0.321	3.08274e-181	Neuromesodermal.progenitor
HAUS4	2.05622e-185	0.322749	0.501	0.26	5.23659e-181	Neuromesodermal.progenitor
RNF220	4.10737e-185	0.330833	0.517	0.276	1.04602e-180	Neuromesodermal.progenitor
RBM26	9.0309e-185	0.348641	0.945	0.887	2.2999e-180	Neuromesodermal.progenitor
LANCL1	1.97377e-184	0.298758	0.435	0.211	5.02659e-180	Neuromesodermal.progenitor
CHAF1A	2.2139e-184	0.365577	0.574	0.317	5.63813e-180	Neuromesodermal.progenitor
XPR1	2.46309e-184	0.337886	0.502	0.265	6.27275e-180	Neuromesodermal.progenitor
HACD2	2.75548e-184	0.380288	0.664	0.428	7.01738e-180	Neuromesodermal.progenitor
BEX2	2.84665e-184	0.324353	0.493	0.25	7.24955e-180	Neuromesodermal.progenitor
ENPP2	2.0642e-183	0.642527	0.465	0.254	5.2569e-179	Neuromesodermal.progenitor
TOMM20	2.76187e-183	0.310438	0.995	0.981	7.03364e-179	Neuromesodermal.progenitor
ARHGAP35	6.51908e-182	0.328257	0.581	0.323	1.66021e-177	Neuromesodermal.progenitor
SFPQ	1.11146e-181	0.331926	1	0.997	2.83055e-177	Neuromesodermal.progenitor
MED30	6.7594e-181	0.322194	0.551	0.303	1.72142e-176	Neuromesodermal.progenitor
IRS2	9.44836e-181	0.301726	0.472	0.237	2.40621e-176	Neuromesodermal.progenitor
CDCA4	4.35978e-180	0.310905	0.526	0.279	1.11031e-175	Neuromesodermal.progenitor
STRBP	8.3187e-180	0.362037	0.888	0.782	2.11852e-175	Neuromesodermal.progenitor
LRRFIP2	1.53576e-179	0.35242	0.585	0.338	3.91112e-175	Neuromesodermal.progenitor
CMAS	1.68592e-179	0.334215	0.612	0.36	4.29352e-175	Neuromesodermal.progenitor
LOC118154716	3.4659e-179	0.35342	0.63	0.379	8.8266e-175	Neuromesodermal.progenitor
RIMS2	4.09666e-179	0.286217	0.347	0.149	1.0433e-174	Neuromesodermal.progenitor
EPHA7	7.82644e-178	0.266671	0.569	0.308	1.99316e-173	Neuromesodermal.progenitor
NDUFA7	9.56386e-178	0.353557	0.959	0.924	2.43563e-173	Neuromesodermal.progenitor
CALR	1.78293e-177	0.33391	1	0.998	4.54058e-173	Neuromesodermal.progenitor
TRIM71	3.61396e-177	0.357506	0.907	0.79	9.20368e-173	Neuromesodermal.progenitor
ATP1B3	4.35573e-177	0.380312	0.722	0.527	1.10927e-172	Neuromesodermal.progenitor
LPAR4	1.74204e-175	0.257869	0.332	0.141	4.43645e-171	Neuromesodermal.progenitor
FUBP1	9.7361e-175	0.356563	0.928	0.855	2.47949e-170	Neuromesodermal.progenitor
ASPH	2.05568e-174	0.415349	0.864	0.757	5.23519e-170	Neuromesodermal.progenitor
UNC119	3.07437e-174	0.305611	0.46	0.236	7.8295e-170	Neuromesodermal.progenitor
POU2F1	5.65378e-174	0.300421	0.466	0.238	1.43985e-169	Neuromesodermal.progenitor
SLC37A4	7.50938e-174	0.301459	0.525	0.283	1.91241e-169	Neuromesodermal.progenitor
LIMD2	2.18774e-173	0.317079	0.578	0.325	5.57152e-169	Neuromesodermal.progenitor
ABI2	1.23833e-172	0.361952	0.875	0.777	3.15366e-168	Neuromesodermal.progenitor
HDGFL3	1.33733e-172	0.345582	0.911	0.822	3.40577e-168	Neuromesodermal.progenitor
ADGRV1	1.13515e-171	0.28878	0.472	0.239	2.8909e-167	Neuromesodermal.progenitor
RAB30	2.55128e-171	0.380839	0.433	0.22	6.49735e-167	Neuromesodermal.progenitor
LYPD6B	3.2841e-171	0.255269	0.374	0.166	8.36362e-167	Neuromesodermal.progenitor
TRA2A	3.64229e-171	0.298227	0.984	0.958	9.27583e-167	Neuromesodermal.progenitor
MCM2	1.06614e-170	0.33165	0.579	0.328	2.71514e-166	Neuromesodermal.progenitor
NUP54	1.69015e-170	0.322617	0.591	0.345	4.3043e-166	Neuromesodermal.progenitor
CEP43	2.48699e-170	0.379177	0.671	0.446	6.33362e-166	Neuromesodermal.progenitor
DCAF13	3.15482e-170	0.299984	0.561	0.314	8.03439e-166	Neuromesodermal.progenitor
PPAT	9.43959e-170	0.329081	0.536	0.301	2.40398e-165	Neuromesodermal.progenitor
LOC100388905	9.92101e-170	0.299673	0.437	0.22	2.52658e-165	Neuromesodermal.progenitor
RAVER2	1.04797e-169	0.26234	0.402	0.19	2.66886e-165	Neuromesodermal.progenitor
ZC3H8	1.27859e-169	0.300906	0.445	0.225	3.25619e-165	Neuromesodermal.progenitor
LFNG	1.29142e-169	0.360773	0.36	0.159	3.28886e-165	Neuromesodermal.progenitor
TMEM184C	1.37372e-169	0.273604	0.37	0.17	3.49846e-165	Neuromesodermal.progenitor
SNRPD1	9.07757e-169	0.288591	0.993	0.972	2.31179e-164	Neuromesodermal.progenitor
ATP9A	1.63027e-168	0.270886	0.394	0.186	4.15181e-164	Neuromesodermal.progenitor
IFT22	2.18724e-168	0.278583	0.481	0.25	5.57025e-164	Neuromesodermal.progenitor
INO80D	5.09183e-168	0.315379	0.481	0.258	1.29674e-163	Neuromesodermal.progenitor
LOC103792162	5.10912e-168	0.327048	0.551	0.309	1.30114e-163	Neuromesodermal.progenitor
PIP4K2B	7.73361e-168	0.287586	0.469	0.244	1.96952e-163	Neuromesodermal.progenitor
PFN2	1.32874e-167	0.369562	0.8	0.646	3.3839e-163	Neuromesodermal.progenitor
WEE1	1.34784e-167	0.301678	0.492	0.26	3.43253e-163	Neuromesodermal.progenitor
TRIM37	2.80069e-167	0.297943	0.509	0.272	7.13251e-163	Neuromesodermal.progenitor
TFRC	2.97632e-167	0.307417	0.547	0.303	7.5798e-163	Neuromesodermal.progenitor
MTRR	3.61621e-167	0.282959	0.449	0.228	9.20941e-163	Neuromesodermal.progenitor
WIPI2	4.64119e-167	0.311754	0.591	0.342	1.18197e-162	Neuromesodermal.progenitor
RFTN2	5.82294e-166	0.296771	0.552	0.302	1.48293e-161	Neuromesodermal.progenitor
CHAMP1	7.82223e-166	0.308394	0.563	0.321	1.99209e-161	Neuromesodermal.progenitor
TUSC3	1.31422e-165	0.354217	0.796	0.631	3.34693e-161	Neuromesodermal.progenitor
SLC25A33	3.61719e-165	0.270958	0.429	0.213	9.21189e-161	Neuromesodermal.progenitor
LOC100409061	4.92467e-165	0.300384	0.559	0.314	1.25417e-160	Neuromesodermal.progenitor
PAAF1	1.40855e-164	0.285268	0.516	0.279	3.58715e-160	Neuromesodermal.progenitor
KLHL23	3.01783e-164	0.311555	0.546	0.303	7.68551e-160	Neuromesodermal.progenitor
DNAJC24	3.47162e-164	0.288764	0.585	0.334	8.84116e-160	Neuromesodermal.progenitor
PTPDC1	3.99584e-164	0.255544	0.357	0.163	1.01762e-159	Neuromesodermal.progenitor
EFNB1	5.1827e-164	0.329848	0.474	0.252	1.31988e-159	Neuromesodermal.progenitor
CBX1	5.99705e-164	0.293091	0.998	0.979	1.52727e-159	Neuromesodermal.progenitor
LSM6	9.63602e-164	0.33527	0.888	0.815	2.454e-159	Neuromesodermal.progenitor
ACVR2A	1.2358e-163	0.267039	0.35	0.158	3.14721e-159	Neuromesodermal.progenitor
ACTA1	2.75865e-163	0.291156	0.112	0.024	7.02545e-159	Neuromesodermal.progenitor
ZBTB44	6.21624e-163	0.313531	0.589	0.346	1.58309e-158	Neuromesodermal.progenitor
PLOD2	8.41312e-163	0.339972	0.585	0.344	2.14257e-158	Neuromesodermal.progenitor
SEMA5A	8.41537e-163	0.398149	0.811	0.659	2.14314e-158	Neuromesodermal.progenitor
PRPF19	1.2349e-162	0.298935	0.566	0.325	3.14493e-158	Neuromesodermal.progenitor
HNRNPA2B1	1.33039e-162	0.260134	1	1	3.38812e-158	Neuromesodermal.progenitor
NDUFAF3	4.0253e-162	0.294543	0.513	0.283	1.02512e-157	Neuromesodermal.progenitor
KDM3A	5.78311e-162	0.321475	0.54	0.304	1.47278e-157	Neuromesodermal.progenitor
U2SURP	6.85384e-162	0.314625	0.982	0.948	1.74547e-157	Neuromesodermal.progenitor
HADH	8.86677e-162	0.300942	0.415	0.208	2.2581e-157	Neuromesodermal.progenitor
LOC100393827	1.14718e-161	0.309382	0.548	0.307	2.92151e-157	Neuromesodermal.progenitor
ORC1	1.9126e-161	0.286111	0.49	0.259	4.87082e-157	Neuromesodermal.progenitor
BLM	1.94937e-161	0.32131	0.525	0.291	4.96447e-157	Neuromesodermal.progenitor
P4HA1	2.0955e-161	0.397723	0.871	0.787	5.3366e-157	Neuromesodermal.progenitor
SUV39H2	1.82479e-160	0.260742	0.42	0.208	4.6472e-156	Neuromesodermal.progenitor
PPIG	1.82767e-160	0.312299	0.988	0.974	4.65454e-156	Neuromesodermal.progenitor
FAM120B	5.13225e-160	0.291764	0.441	0.229	1.30703e-155	Neuromesodermal.progenitor
H2AFV	7.74762e-160	0.331435	0.965	0.925	1.97309e-155	Neuromesodermal.progenitor
PM20D2	2.24566e-159	0.290379	0.486	0.262	5.71902e-155	Neuromesodermal.progenitor
FZD3	2.27824e-159	0.334981	0.659	0.431	5.80199e-155	Neuromesodermal.progenitor
RYBP	4.12585e-159	0.349185	0.689	0.48	1.05073e-154	Neuromesodermal.progenitor
UHRF1BP1L	4.35609e-159	0.292343	0.458	0.24	1.10937e-154	Neuromesodermal.progenitor
DZIP1	5.77231e-159	0.286512	0.449	0.231	1.47004e-154	Neuromesodermal.progenitor
ABRAXAS1	8.71873e-159	0.283089	0.41	0.205	2.2204e-154	Neuromesodermal.progenitor
ZSCAN9	8.74695e-159	0.260258	0.393	0.191	2.22759e-154	Neuromesodermal.progenitor
RFC4	1.0405e-158	0.336101	0.665	0.443	2.64983e-154	Neuromesodermal.progenitor
CYLD	1.66381e-158	0.290049	0.375	0.18	4.23722e-154	Neuromesodermal.progenitor
MTHFD1L	1.86265e-158	0.313454	0.565	0.325	4.7436e-154	Neuromesodermal.progenitor
TTC21B	1.94085e-158	0.291485	0.493	0.268	4.94277e-154	Neuromesodermal.progenitor
UHRF1	2.35684e-158	0.335039	0.528	0.289	6.00216e-154	Neuromesodermal.progenitor
FAM184A	5.10375e-158	0.305597	0.484	0.254	1.29977e-153	Neuromesodermal.progenitor
MCM8	6.27103e-158	0.298584	0.454	0.238	1.59704e-153	Neuromesodermal.progenitor
TCOF1	1.02893e-157	0.309582	0.556	0.32	2.62037e-153	Neuromesodermal.progenitor
B3GAT3	1.06448e-157	0.277893	0.481	0.258	2.71091e-153	Neuromesodermal.progenitor
GET1	2.18824e-157	0.281653	0.467	0.248	5.57279e-153	Neuromesodermal.progenitor
CSNK1G1	4.39171e-157	0.316549	0.445	0.236	1.11844e-152	Neuromesodermal.progenitor
RBFOX2	8.45013e-157	0.3482	0.857	0.752	2.15199e-152	Neuromesodermal.progenitor
HNRNPK	1.18757e-156	0.27098	1	0.995	3.02439e-152	Neuromesodermal.progenitor
OCIAD2	1.58546e-156	0.318026	0.501	0.278	4.0377e-152	Neuromesodermal.progenitor
LOC100396851	3.23607e-156	0.287277	0.5	0.274	8.24129e-152	Neuromesodermal.progenitor
SLC8A1	3.59642e-156	0.264347	0.374	0.174	9.15901e-152	Neuromesodermal.progenitor
LOC100385770	4.1409e-156	0.335599	0.891	0.81	1.05456e-151	Neuromesodermal.progenitor
MALT1	8.09936e-156	0.270286	0.4	0.197	2.06266e-151	Neuromesodermal.progenitor
ARHGAP5	1.1938e-155	0.359622	0.896	0.825	3.04026e-151	Neuromesodermal.progenitor
GOLM1	1.40358e-155	0.36529	0.784	0.625	3.57449e-151	Neuromesodermal.progenitor
NAP1L1	2.08826e-155	0.254368	1	0.996	5.31816e-151	Neuromesodermal.progenitor
HNRNPAB	2.41163e-155	0.299453	0.992	0.979	6.14171e-151	Neuromesodermal.progenitor
CUTA	3.07694e-155	0.350923	0.805	0.677	7.83605e-151	Neuromesodermal.progenitor
AMOTL1	5.19409e-155	0.395399	0.785	0.637	1.32278e-150	Neuromesodermal.progenitor
GFPT1	2.38375e-154	0.349835	0.708	0.512	6.07069e-150	Neuromesodermal.progenitor
TIMM50	6.11955e-154	0.315998	0.513	0.293	1.55847e-149	Neuromesodermal.progenitor
CASP2	9.17716e-154	0.274545	0.463	0.247	2.33715e-149	Neuromesodermal.progenitor
UBTD2	1.08219e-153	0.292381	0.553	0.319	2.75601e-149	Neuromesodermal.progenitor
YWHAQ	2.32043e-153	0.290905	0.979	0.948	5.90944e-149	Neuromesodermal.progenitor
BARD1	6.86233e-153	0.297189	0.472	0.251	1.74763e-148	Neuromesodermal.progenitor
LMO3	1.44945e-152	0.278565	0.27	0.109	3.69132e-148	Neuromesodermal.progenitor
ESYT1	5.58208e-152	0.301189	0.516	0.293	1.42159e-147	Neuromesodermal.progenitor
DPY19L1	7.9394e-152	0.297795	0.56	0.326	2.02193e-147	Neuromesodermal.progenitor
SRSF10	8.95444e-152	0.297923	0.966	0.929	2.28043e-147	Neuromesodermal.progenitor
MTHFD2	2.25068e-151	0.274804	0.524	0.291	5.7318e-147	Neuromesodermal.progenitor
CALD1	3.99836e-151	0.352494	0.951	0.886	1.01826e-146	Neuromesodermal.progenitor
UHRF2	4.62222e-151	0.315614	0.61	0.382	1.17714e-146	Neuromesodermal.progenitor
UGCG	5.65396e-151	0.275437	0.5	0.277	1.43989e-146	Neuromesodermal.progenitor
WDR77	5.81498e-151	0.282676	0.53	0.298	1.4809e-146	Neuromesodermal.progenitor
PIGK	1.96883e-150	0.283726	0.536	0.306	5.01402e-146	Neuromesodermal.progenitor
PIAS2	2.96865e-150	0.293463	0.525	0.298	7.56026e-146	Neuromesodermal.progenitor
SRPK2	3.93834e-150	0.355689	0.803	0.687	1.00298e-145	Neuromesodermal.progenitor
CDK2AP1	4.75216e-150	0.332206	0.9	0.848	1.21023e-145	Neuromesodermal.progenitor
RCOR2	5.59385e-150	0.257023	0.473	0.252	1.42459e-145	Neuromesodermal.progenitor
SMG7	5.72509e-150	0.324106	0.625	0.402	1.45801e-145	Neuromesodermal.progenitor
SRGAP2	5.99506e-150	0.358006	0.778	0.625	1.52676e-145	Neuromesodermal.progenitor
CBX5	8.92568e-150	0.326785	0.987	0.965	2.2731e-145	Neuromesodermal.progenitor
PURA	1.22925e-149	0.276408	0.402	0.204	3.13054e-145	Neuromesodermal.progenitor
PTGFRN	1.41298e-149	0.269762	0.448	0.236	3.59843e-145	Neuromesodermal.progenitor
E2F5	2.14562e-149	0.278246	0.534	0.302	5.46426e-145	Neuromesodermal.progenitor
ANTXR2	2.58954e-149	0.251134	0.469	0.246	6.59478e-145	Neuromesodermal.progenitor
LOC118148066	3.23021e-149	0.277092	0.427	0.221	8.22637e-145	Neuromesodermal.progenitor
LOC103792659	5.24687e-149	0.295784	0.513	0.287	1.33622e-144	Neuromesodermal.progenitor
UBXN2A	8.07149e-149	0.280658	0.515	0.289	2.05557e-144	Neuromesodermal.progenitor
LOC108590127	8.84807e-149	0.250832	0.389	0.193	2.25334e-144	Neuromesodermal.progenitor
LEMD3	4.43066e-148	0.258041	0.417	0.213	1.12836e-143	Neuromesodermal.progenitor
MCEE	1.08425e-147	0.286174	0.584	0.349	2.76127e-143	Neuromesodermal.progenitor
LDHA	1.28944e-147	0.257417	0.367	0.176	3.28381e-143	Neuromesodermal.progenitor
CENPJ	1.66542e-147	0.361935	0.581	0.359	4.24132e-143	Neuromesodermal.progenitor
LOC100385103	2.56132e-147	0.250848	1	0.997	6.52292e-143	Neuromesodermal.progenitor
MAGI3	6.08362e-147	0.285546	0.451	0.242	1.54931e-142	Neuromesodermal.progenitor
LOC103787304	8.85272e-147	0.308446	0.472	0.259	2.25452e-142	Neuromesodermal.progenitor
SYNCRIP	1.09972e-146	0.29448	0.98	0.95	2.80065e-142	Neuromesodermal.progenitor
COMMD7	2.01196e-146	0.348087	0.819	0.722	5.12387e-142	Neuromesodermal.progenitor
DACT1	2.79715e-146	0.419461	0.274	0.12	7.12351e-142	Neuromesodermal.progenitor
PPM1G	3.1655e-146	0.287866	0.966	0.939	8.06158e-142	Neuromesodermal.progenitor
LOC103787762	7.68906e-146	0.267096	0.44	0.232	1.95817e-141	Neuromesodermal.progenitor
IPO7	8.36907e-146	0.330142	0.896	0.835	2.13135e-141	Neuromesodermal.progenitor
MSH6	8.83443e-146	0.383054	0.887	0.828	2.24986e-141	Neuromesodermal.progenitor
SRPK1	1.38186e-145	0.328538	0.794	0.655	3.51919e-141	Neuromesodermal.progenitor
PGAP1	1.41155e-145	0.344915	0.773	0.613	3.59479e-141	Neuromesodermal.progenitor
SIAH1	1.87028e-145	0.297518	0.57	0.342	4.76304e-141	Neuromesodermal.progenitor
PRELID2	2.06741e-145	0.34612	0.718	0.545	5.26508e-141	Neuromesodermal.progenitor
CLOCK	2.45451e-145	0.273009	0.442	0.234	6.2509e-141	Neuromesodermal.progenitor
LOC100895582	3.53442e-143	0.397736	0.836	0.75	9.0011e-139	Neuromesodermal.progenitor
AAMDC	1.33996e-142	0.270727	0.538	0.311	3.41247e-138	Neuromesodermal.progenitor
CXXC5	2.14918e-142	0.425375	0.741	0.608	5.47331e-138	Neuromesodermal.progenitor
B4GALT5	6.66278e-142	0.279716	0.453	0.247	1.69681e-137	Neuromesodermal.progenitor
PAIP2B	2.38243e-141	0.281512	0.505	0.284	6.06732e-137	Neuromesodermal.progenitor
CFAP20	2.58646e-141	0.340157	0.703	0.522	6.58694e-137	Neuromesodermal.progenitor
FHL1	2.86544e-141	0.275612	0.537	0.306	7.29741e-137	Neuromesodermal.progenitor
PDXDC1	3.21758e-141	0.265759	0.473	0.262	8.19422e-137	Neuromesodermal.progenitor
RNF170	5.09163e-141	0.261829	0.443	0.238	1.29669e-136	Neuromesodermal.progenitor
TP53BP2	7.99156e-141	0.349438	0.728	0.561	2.03521e-136	Neuromesodermal.progenitor
RPL26L1	1.09258e-140	0.285835	0.921	0.875	2.78248e-136	Neuromesodermal.progenitor
LIMK1	1.36155e-140	0.255202	0.431	0.229	3.46746e-136	Neuromesodermal.progenitor
C3H4orf46	7.04003e-140	0.282508	0.539	0.314	1.79289e-135	Neuromesodermal.progenitor
RERE	2.69301e-139	0.290727	0.954	0.902	6.8583e-135	Neuromesodermal.progenitor
MLLT11	4.54678e-139	0.279752	0.613	0.377	1.15793e-134	Neuromesodermal.progenitor
VRK1	9.39925e-139	0.310384	0.542	0.322	2.39371e-134	Neuromesodermal.progenitor
USB1	1.78202e-138	0.285963	0.503	0.29	4.53827e-134	Neuromesodermal.progenitor
SCARB2	3.07802e-138	0.281917	0.498	0.283	7.8388e-134	Neuromesodermal.progenitor
TFDP2	4.83869e-138	0.322376	0.85	0.729	1.23227e-133	Neuromesodermal.progenitor
CHD4	7.76471e-138	0.292805	0.993	0.98	1.97744e-133	Neuromesodermal.progenitor
ASAP2	1.77267e-137	0.296831	0.807	0.656	4.51447e-133	Neuromesodermal.progenitor
XPO6	2.05363e-137	0.279164	0.543	0.325	5.22997e-133	Neuromesodermal.progenitor
UGGT2	2.14699e-137	0.281636	0.57	0.34	5.46774e-133	Neuromesodermal.progenitor
FAM3C	6.16954e-137	0.336102	0.802	0.684	1.5712e-132	Neuromesodermal.progenitor
CENPH	1.26528e-136	0.342749	0.672	0.472	3.2223e-132	Neuromesodermal.progenitor
YES1	1.29082e-136	0.260604	0.567	0.336	3.28732e-132	Neuromesodermal.progenitor
ACER3	1.37981e-136	0.293299	0.39	0.205	3.51397e-132	Neuromesodermal.progenitor
DARS1	2.10718e-136	0.334813	0.743	0.592	5.36636e-132	Neuromesodermal.progenitor
HNRNPH1	2.13495e-136	0.267758	0.996	0.98	5.43708e-132	Neuromesodermal.progenitor
PPIL1	2.38416e-136	0.277054	0.592	0.368	6.07173e-132	Neuromesodermal.progenitor
UPF3B	6.63634e-136	0.360541	0.772	0.653	1.69008e-131	Neuromesodermal.progenitor
ATXN2L	9.36419e-136	0.266668	0.532	0.314	2.38478e-131	Neuromesodermal.progenitor
HNRNPA0	1.58426e-135	0.285516	0.981	0.951	4.03464e-131	Neuromesodermal.progenitor
LOC100400493	1.6934e-135	0.25414	0.458	0.251	4.31259e-131	Neuromesodermal.progenitor
E2F7	2.74713e-135	0.261422	0.353	0.172	6.99612e-131	Neuromesodermal.progenitor
DROSHA	2.91968e-135	0.259917	0.441	0.24	7.43555e-131	Neuromesodermal.progenitor
TRMT5	3.73935e-135	0.271496	0.37	0.189	9.52301e-131	Neuromesodermal.progenitor
ITGB5	4.76285e-135	0.277751	0.511	0.292	1.21295e-130	Neuromesodermal.progenitor
RAB23	5.21244e-135	0.261372	0.493	0.279	1.32745e-130	Neuromesodermal.progenitor
NEMP1	6.00805e-135	0.266248	0.508	0.29	1.53007e-130	Neuromesodermal.progenitor
SOX5	2.37882e-134	0.287458	0.443	0.241	6.05815e-130	Neuromesodermal.progenitor
HNRNPH3	2.79991e-134	0.280898	0.99	0.969	7.13054e-130	Neuromesodermal.progenitor
FANCL	3.74462e-134	0.253351	0.456	0.251	9.53642e-130	Neuromesodermal.progenitor
NCAPG2	5.81582e-134	0.318476	0.513	0.301	1.48112e-129	Neuromesodermal.progenitor
PIMREG	8.45051e-134	0.303232	0.342	0.168	2.15209e-129	Neuromesodermal.progenitor
CCNG2	1.09615e-133	0.366557	0.762	0.624	2.79157e-129	Neuromesodermal.progenitor
SCAF11	1.50565e-133	0.28032	0.994	0.98	3.83445e-129	Neuromesodermal.progenitor
MTFP1	1.99598e-133	0.268891	0.528	0.308	5.08317e-129	Neuromesodermal.progenitor
MSI2	2.11162e-133	0.352047	0.728	0.567	5.37767e-129	Neuromesodermal.progenitor
GJC1	2.53736e-133	0.289549	0.609	0.385	6.46189e-129	Neuromesodermal.progenitor
ZNF580	2.55484e-133	0.267977	0.512	0.298	6.5064e-129	Neuromesodermal.progenitor
ARMC10	2.99905e-133	0.270529	0.567	0.341	7.63769e-129	Neuromesodermal.progenitor
CDCA7	4.70692e-133	0.297715	0.517	0.303	1.19871e-128	Neuromesodermal.progenitor
PTAR1	5.60239e-133	0.271306	0.529	0.312	1.42676e-128	Neuromesodermal.progenitor
RPL39L	6.22006e-133	0.266797	0.501	0.287	1.58406e-128	Neuromesodermal.progenitor
GALNT7	6.23708e-133	0.357775	0.752	0.622	1.5884e-128	Neuromesodermal.progenitor
MPHOSPH9	7.04471e-133	0.276693	0.476	0.269	1.79408e-128	Neuromesodermal.progenitor
IGSF9	7.74121e-133	0.277227	0.606	0.374	1.97145e-128	Neuromesodermal.progenitor
TCF3	1.54561e-132	0.254932	0.492	0.281	3.9362e-128	Neuromesodermal.progenitor
ILF3	1.5696e-132	0.267737	0.994	0.976	3.9973e-128	Neuromesodermal.progenitor
LOC100403917	1.6989e-132	0.327947	0.859	0.792	4.32659e-128	Neuromesodermal.progenitor
USP39	2.03017e-132	0.270481	0.568	0.345	5.17023e-128	Neuromesodermal.progenitor
LOC100411801	3.21073e-132	0.280255	0.547	0.327	8.17676e-128	Neuromesodermal.progenitor
POLD3	3.90541e-132	0.308916	0.59	0.369	9.9459e-128	Neuromesodermal.progenitor
TSPAN3	4.15707e-132	0.283681	0.907	0.842	1.05868e-127	Neuromesodermal.progenitor
CTHRC1	5.58324e-132	0.43133	0.778	0.674	1.42188e-127	Neuromesodermal.progenitor
MAP2K6	5.83744e-132	0.28522	0.466	0.264	1.48662e-127	Neuromesodermal.progenitor
UBR7	1.1745e-131	0.255344	0.467	0.261	2.99111e-127	Neuromesodermal.progenitor
GTF3A	1.9164e-131	0.274974	0.539	0.323	4.88049e-127	Neuromesodermal.progenitor
GGH	3.24308e-131	0.264856	0.577	0.351	8.25916e-127	Neuromesodermal.progenitor
CCP110	5.19809e-131	0.25948	0.435	0.237	1.3238e-126	Neuromesodermal.progenitor
CCER2	7.99954e-131	0.316252	0.776	0.631	2.03724e-126	Neuromesodermal.progenitor
MCM3	2.22787e-130	0.393906	0.73	0.585	5.67371e-126	Neuromesodermal.progenitor
FAM117B	2.94916e-130	0.253701	0.439	0.241	7.51063e-126	Neuromesodermal.progenitor
LOC100894192	4.91946e-130	0.255611	0.482	0.272	1.25284e-125	Neuromesodermal.progenitor
ADSS2	8.88227e-130	0.267384	0.558	0.339	2.26205e-125	Neuromesodermal.progenitor
RBP1	1.53794e-129	0.508479	0.682	0.537	3.91668e-125	Neuromesodermal.progenitor
LOC118146773	1.55945e-129	0.25516	0.387	0.201	3.97146e-125	Neuromesodermal.progenitor
NUP155	1.6238e-129	0.276811	0.53	0.315	4.13533e-125	Neuromesodermal.progenitor
PDCD7	6.44425e-129	0.262253	0.531	0.316	1.64116e-124	Neuromesodermal.progenitor
IGF1R	1.18734e-128	0.290659	0.915	0.835	3.02381e-124	Neuromesodermal.progenitor
NBAS	1.1896e-128	0.256174	0.457	0.254	3.02955e-124	Neuromesodermal.progenitor
KAT6B	1.22028e-128	0.337744	0.82	0.714	3.10769e-124	Neuromesodermal.progenitor
MAT2A	1.24537e-128	0.317589	0.733	0.569	3.17159e-124	Neuromesodermal.progenitor
KIF5B	1.6078e-128	0.300081	0.934	0.894	4.09458e-124	Neuromesodermal.progenitor
TRIO	2.88651e-128	0.257636	0.504	0.292	7.35106e-124	Neuromesodermal.progenitor
DUSP12	7.46204e-128	0.254751	0.512	0.301	1.90036e-123	Neuromesodermal.progenitor
SOX13	7.9255e-128	0.25249	0.37	0.191	2.01839e-123	Neuromesodermal.progenitor
WBP1	2.84629e-127	0.261204	0.569	0.347	7.24865e-123	Neuromesodermal.progenitor
B3GNT5	3.95113e-127	0.254116	0.435	0.237	1.00623e-122	Neuromesodermal.progenitor
NTPCR	8.22301e-127	0.260449	0.554	0.336	2.09415e-122	Neuromesodermal.progenitor
SCO1	2.66817e-126	0.255948	0.53	0.314	6.79503e-122	Neuromesodermal.progenitor
B4GALT1	4.18456e-126	0.265028	0.56	0.337	1.06568e-121	Neuromesodermal.progenitor
MRPS30	6.35569e-126	0.309698	0.656	0.466	1.6186e-121	Neuromesodermal.progenitor
HSD17B7	6.52409e-126	0.321725	0.711	0.549	1.66149e-121	Neuromesodermal.progenitor
HIF1A	6.82082e-126	0.283132	0.878	0.803	1.73706e-121	Neuromesodermal.progenitor
ALDH6A1	7.15339e-126	0.262024	0.567	0.346	1.82175e-121	Neuromesodermal.progenitor
XPO1	1.23849e-125	0.28176	0.976	0.956	3.15407e-121	Neuromesodermal.progenitor
TTC9C	1.3498e-125	0.304379	0.464	0.272	3.43754e-121	Neuromesodermal.progenitor
PGM1	2.93639e-125	0.260869	0.507	0.297	7.4781e-121	Neuromesodermal.progenitor
OAT	6.45273e-125	0.392209	0.694	0.55	1.64332e-120	Neuromesodermal.progenitor
LOC118150600	2.27687e-124	0.27073	0.508	0.302	5.79851e-120	Neuromesodermal.progenitor
SOCS4	3.36596e-124	0.255711	0.557	0.336	8.57209e-120	Neuromesodermal.progenitor
TMTC3	3.86524e-124	0.274899	0.555	0.339	9.8436e-120	Neuromesodermal.progenitor
SIPA1L1	5.08507e-124	0.26046	0.584	0.361	1.29502e-119	Neuromesodermal.progenitor
NUDCD1	7.63263e-124	0.255584	0.495	0.291	1.9438e-119	Neuromesodermal.progenitor
ZNF770	1.32674e-123	0.313084	0.786	0.678	3.37881e-119	Neuromesodermal.progenitor
LOC100400790	1.49581e-123	0.346069	0.792	0.7	3.80937e-119	Neuromesodermal.progenitor
PDCD5	1.52752e-123	0.292915	0.887	0.839	3.89015e-119	Neuromesodermal.progenitor
ATP6V1B2	1.74347e-123	0.255789	0.511	0.305	4.44009e-119	Neuromesodermal.progenitor
C18H1orf21	5.87896e-123	0.337313	0.699	0.537	1.4972e-118	Neuromesodermal.progenitor
PSMB1	7.05194e-123	0.255606	0.979	0.962	1.79592e-118	Neuromesodermal.progenitor
DNMT3A	7.514e-123	0.364471	0.756	0.628	1.91359e-118	Neuromesodermal.progenitor
STMN1	1.63292e-122	0.284071	0.889	0.81	4.15856e-118	Neuromesodermal.progenitor
KDM1A	1.93179e-122	0.298619	0.87	0.8	4.91969e-118	Neuromesodermal.progenitor
FUS	2.3746e-122	0.289005	0.938	0.889	6.04738e-118	Neuromesodermal.progenitor
SRI	3.66791e-122	0.288028	0.894	0.855	9.34107e-118	Neuromesodermal.progenitor
HMGB2	5.83125e-122	0.451839	0.978	0.925	1.48505e-117	Neuromesodermal.progenitor
SREK1	2.08502e-121	0.26485	0.964	0.929	5.30991e-117	Neuromesodermal.progenitor
PRMT1	2.19601e-121	0.262127	0.907	0.855	5.59258e-117	Neuromesodermal.progenitor
GCFC2	4.40227e-121	0.333465	0.746	0.616	1.12113e-116	Neuromesodermal.progenitor
DTL	1.18406e-120	0.26173	0.405	0.217	3.01543e-116	Neuromesodermal.progenitor
ILF2	1.41586e-120	0.263598	0.939	0.891	3.60577e-116	Neuromesodermal.progenitor
LIG3	3.39376e-120	0.250313	0.564	0.347	8.64288e-116	Neuromesodermal.progenitor
HNRNPU	5.35091e-120	0.285786	0.995	0.989	1.36272e-115	Neuromesodermal.progenitor
XPO5	6.12268e-120	0.250677	0.495	0.291	1.55926e-115	Neuromesodermal.progenitor
DSCC1	1.24016e-119	0.291479	0.43	0.242	3.15832e-115	Neuromesodermal.progenitor
MYO10	1.62458e-119	0.352727	0.591	0.401	4.13733e-115	Neuromesodermal.progenitor
GTF2A1	3.50438e-119	0.251115	0.475	0.276	8.92459e-115	Neuromesodermal.progenitor
CTNNBL1	4.09302e-119	0.257868	0.575	0.361	1.04237e-114	Neuromesodermal.progenitor
MGST1	5.05294e-119	0.257481	0.525	0.307	1.28683e-114	Neuromesodermal.progenitor
C10H14orf119	5.12855e-119	0.261597	0.47	0.277	1.30609e-114	Neuromesodermal.progenitor
C11H11orf83	2.26136e-118	0.256028	0.534	0.328	5.75902e-114	Neuromesodermal.progenitor
LMNB1	2.47766e-118	0.341575	0.872	0.794	6.30985e-114	Neuromesodermal.progenitor
ROCK2	3.25702e-118	0.313919	0.878	0.817	8.29465e-114	Neuromesodermal.progenitor
CNPY4	3.84537e-118	0.276652	0.587	0.383	9.793e-114	Neuromesodermal.progenitor
TMX2	5.18356e-118	0.251538	0.437	0.249	1.3201e-113	Neuromesodermal.progenitor
RFC2	6.31414e-118	0.30444	0.767	0.636	1.60802e-113	Neuromesodermal.progenitor
RANBP6	6.54727e-118	0.257056	0.54	0.331	1.66739e-113	Neuromesodermal.progenitor
BRWD1	7.03319e-118	0.265102	0.555	0.343	1.79114e-113	Neuromesodermal.progenitor
MIB1	7.26381e-118	0.30116	0.828	0.723	1.84987e-113	Neuromesodermal.progenitor
DLC1	8.76373e-118	0.401537	0.436	0.258	2.23186e-113	Neuromesodermal.progenitor
DNAJB9	1.14398e-117	0.263872	0.516	0.313	2.91338e-113	Neuromesodermal.progenitor
PDIA3	1.39126e-117	0.292204	0.985	0.963	3.54313e-113	Neuromesodermal.progenitor
RBPJ	1.45159e-117	0.280397	0.86	0.79	3.69677e-113	Neuromesodermal.progenitor
XRCC5	1.68366e-117	0.252381	0.994	0.983	4.28778e-113	Neuromesodermal.progenitor
UBA2	3.62618e-117	0.269255	0.837	0.738	9.23478e-113	Neuromesodermal.progenitor
CTPS1	1.86884e-116	0.299409	0.683	0.508	4.75937e-112	Neuromesodermal.progenitor
EXOSC2	2.807e-116	0.252841	0.53	0.323	7.1486e-112	Neuromesodermal.progenitor
RFX3	4.39091e-116	0.308137	0.703	0.546	1.11823e-111	Neuromesodermal.progenitor
PRPSAP1	4.6241e-116	0.252975	0.582	0.37	1.17762e-111	Neuromesodermal.progenitor
LOC103789846	2.04758e-115	0.266285	0.498	0.3	5.21456e-111	Neuromesodermal.progenitor
ACOT13	5.73844e-115	0.284276	0.83	0.736	1.46141e-110	Neuromesodermal.progenitor
PPP1R12A	8.64878e-115	0.283513	0.893	0.833	2.20258e-110	Neuromesodermal.progenitor
ZNHIT3	1.1228e-114	0.265586	0.594	0.39	2.85943e-110	Neuromesodermal.progenitor
CTBP2	1.45814e-114	0.297637	0.777	0.654	3.71344e-110	Neuromesodermal.progenitor
TEAD2	3.1317e-114	0.291391	0.667	0.485	7.97549e-110	Neuromesodermal.progenitor
TPM4	3.53957e-114	0.252257	0.998	0.979	9.01421e-110	Neuromesodermal.progenitor
SIGMAR1	5.62183e-114	0.296077	0.674	0.509	1.43171e-109	Neuromesodermal.progenitor
NAA40	6.86984e-114	0.287425	0.654	0.467	1.74954e-109	Neuromesodermal.progenitor
UNC50	2.74582e-113	0.252126	0.533	0.333	6.99279e-109	Neuromesodermal.progenitor
CDC5L	3.14343e-113	0.270828	0.867	0.803	8.00536e-109	Neuromesodermal.progenitor
PPP1CB	4.17216e-113	0.2742	0.883	0.821	1.06253e-108	Neuromesodermal.progenitor
PAIP2	5.87676e-113	0.282748	0.793	0.705	1.49664e-108	Neuromesodermal.progenitor
SS18	6.39362e-113	0.320105	0.693	0.538	1.62826e-108	Neuromesodermal.progenitor
PLCH1	7.03822e-113	0.252367	0.385	0.207	1.79242e-108	Neuromesodermal.progenitor
TOP1	7.83328e-113	0.252268	0.988	0.978	1.9949e-108	Neuromesodermal.progenitor
PRRC2B	8.90495e-113	0.275079	0.951	0.917	2.26782e-108	Neuromesodermal.progenitor
UBE2D2	1.42978e-112	0.276622	0.796	0.7	3.64121e-108	Neuromesodermal.progenitor
BCAT1	1.72746e-112	0.292078	0.84	0.739	4.39932e-108	Neuromesodermal.progenitor
FUBP3	2.11379e-112	0.250229	0.544	0.34	5.38319e-108	Neuromesodermal.progenitor
FAM120A	3.25122e-112	0.313433	0.669	0.51	8.27989e-108	Neuromesodermal.progenitor
DGUOK	3.42559e-112	0.29008	0.758	0.636	8.72395e-108	Neuromesodermal.progenitor
BNIP3L	1.92202e-111	0.26998	0.93	0.887	4.89482e-107	Neuromesodermal.progenitor
ALDH9A1	8.96186e-111	0.277401	0.657	0.477	2.28232e-106	Neuromesodermal.progenitor
KAZN	2.78541e-110	0.251903	0.428	0.246	7.0936e-106	Neuromesodermal.progenitor
OARD1	6.44113e-110	0.261034	0.951	0.918	1.64036e-105	Neuromesodermal.progenitor
UBE2H	4.10213e-109	0.302602	0.857	0.802	1.04469e-104	Neuromesodermal.progenitor
M6PR	2.64829e-108	0.279358	0.853	0.8	6.74441e-104	Neuromesodermal.progenitor
CHD7	3.25694e-108	0.286202	0.978	0.953	8.29445e-104	Neuromesodermal.progenitor
USP7	5.15254e-108	0.292865	0.782	0.679	1.3122e-103	Neuromesodermal.progenitor
MCM6	6.30824e-108	0.348985	0.654	0.493	1.60652e-103	Neuromesodermal.progenitor
PHF6	1.17916e-107	0.259742	0.877	0.807	3.00297e-103	Neuromesodermal.progenitor
DPCD	1.20551e-106	0.286289	0.765	0.646	3.07008e-102	Neuromesodermal.progenitor
SURF2	3.86454e-106	0.254464	0.603	0.406	9.84183e-102	Neuromesodermal.progenitor
TMSB15A	5.57144e-106	0.263881	0.849	0.757	1.41888e-101	Neuromesodermal.progenitor
RNF4	8.97157e-106	0.260024	0.543	0.347	2.28479e-101	Neuromesodermal.progenitor
MEX3A	1.86052e-105	0.280385	0.861	0.762	4.73818e-101	Neuromesodermal.progenitor
AGO1	2.36462e-105	0.279239	0.67	0.505	6.02198e-101	Neuromesodermal.progenitor
AKAP9	3.13672e-105	0.28189	0.973	0.947	7.98829e-101	Neuromesodermal.progenitor
FMR1	1.03626e-104	0.276304	0.628	0.448	2.63905e-100	Neuromesodermal.progenitor
CTXN1	2.28666e-104	0.286635	0.744	0.588	5.82345e-100	Neuromesodermal.progenitor
HILPDA	2.78677e-104	0.279924	0.617	0.435	7.09707e-100	Neuromesodermal.progenitor
METTL9	3.89062e-104	0.273882	0.811	0.724	9.90823e-100	Neuromesodermal.progenitor
BPNT2	7.29362e-104	0.275852	0.691	0.531	1.85747e-99	Neuromesodermal.progenitor
ZWINT	9.60879e-104	0.2568	0.399	0.227	2.44707e-99	Neuromesodermal.progenitor
UNG	4.19637e-103	0.275787	0.461	0.277	1.06869e-98	Neuromesodermal.progenitor
MAP4K4	4.73499e-103	0.286068	0.861	0.809	1.20586e-98	Neuromesodermal.progenitor
RBBP4	5.0481e-103	0.251885	0.898	0.862	1.2856e-98	Neuromesodermal.progenitor
TCERG1	1.1308e-102	0.285944	0.837	0.763	2.8798e-98	Neuromesodermal.progenitor
LOC100399721	1.40749e-102	0.259962	0.868	0.808	3.58446e-98	Neuromesodermal.progenitor
CDC6	2.07095e-102	0.258298	0.397	0.223	5.2741e-98	Neuromesodermal.progenitor
PKP4	8.00709e-102	0.288984	0.635	0.464	2.03917e-97	Neuromesodermal.progenitor
CELF1	8.23645e-102	0.253111	0.89	0.838	2.09758e-97	Neuromesodermal.progenitor
ZNF260	1.03424e-101	0.277497	0.701	0.547	2.63389e-97	Neuromesodermal.progenitor
NSD2	7.29319e-100	0.289826	0.807	0.704	1.85736e-95	Neuromesodermal.progenitor
CDCA2	1.53704e-99	0.360109	0.423	0.254	3.91439e-95	Neuromesodermal.progenitor
MIS18A	1.54978e-99	0.282789	0.682	0.529	3.94682e-95	Neuromesodermal.progenitor
MDC1	3.22299e-99	0.270619	0.595	0.415	8.20799e-95	Neuromesodermal.progenitor
CNOT1	9.3704e-99	0.263537	0.811	0.734	2.38636e-94	Neuromesodermal.progenitor
DICER1	3.3385e-97	0.268405	0.932	0.895	8.50217e-93	Neuromesodermal.progenitor
N4BP2	4.22865e-97	0.295716	0.803	0.727	1.07691e-92	Neuromesodermal.progenitor
PHPT1	1.15675e-96	0.263159	0.792	0.719	2.9459e-92	Neuromesodermal.progenitor
PDIA4	1.36993e-96	0.283286	0.966	0.94	3.48881e-92	Neuromesodermal.progenitor
TENM3	2.96908e-96	0.309867	0.498	0.321	7.56137e-92	Neuromesodermal.progenitor
NKAP	4.64636e-96	0.253923	0.605	0.431	1.18329e-91	Neuromesodermal.progenitor
AGPAT5	6.98828e-96	0.251275	0.625	0.448	1.77971e-91	Neuromesodermal.progenitor
SLTM	1.9046e-95	0.257587	0.914	0.878	4.85045e-91	Neuromesodermal.progenitor
MCM7	1.12357e-94	0.252342	0.814	0.717	2.8614e-90	Neuromesodermal.progenitor
KLHDC10	2.21627e-94	0.27389	0.454	0.284	5.64419e-90	Neuromesodermal.progenitor
[truncated: 9,353 more rows]
