# Supplementary material for: Efficient generation of marmoset primordial germ cell-like cells using induced pluripotent stem cells
Source: eLife. 2023 Jan 31;12:e82263. doi: 10.7554/eLife.82263 (PMC9937652; doi:10.7554/eLife.82263)
Supplement: Figure 6—source data 1. [file elife-82263-fig6-data1.xlsx]

## Sheet: Sheet1
Figure 6–Source Data 1. Top 5000 variably expressed genes among transcriptomes of different types of cells in Figure 6D.
Each row is a gene, each column is a sample.
Colors indicate Z-score normalized value of Log2(RPKM+1) and scaled in row.
Genes are hierarchically clustered based on Euclidean distance.
genes	Groups
SNRPD1	1
LSM3	1
PSMA1	1
DBI	1
MED21	1
ARL2	1
COPS9	1
NDUFS5	1
COG2	1
ELOC	1
BUD31	1
CDC26	1
BCKDK	1
RFC4	1
ATP5F1C	1
HSBP1	1
FARSB	1
ENSA	1
MRPS15	1
ARF4	1
SEC13	1
ATP5F1E	1
TXNL1	1
SELENOW	1
UQCRQ	1
NAV2	1
MTPN	1
UFD1	1
PSMC3	1
CDC123	1
RFC2	1
RIOK2	1
PSMA5	1
PSMD12	1
FAM136A	1
SRP19	1
MRPL45	1
UBE2V2	1
UQCR10	1
CWC15	1
RPL36AL	1
VDAC2	1
TIMM8A	1
EIF6	1
TOMM5	1
MICOS10	1
POLR2E	1
GRPEL1	1
TPM3	1
DRG1	1
EBNA1BP2	1
CCDC58	1
MRPL20	1
C22H19orf53	1
EIF3M	1
POLR2D	1
PDCD5	1
MRPS24	1
JPT2	1
PSMA6	1
PSMB2	1
BRIX1	1
ZSWIM7	1
CAP1	1
MPHOSPH6	1
NDUFB6	1
MRPL22	1
SNUPN	1
USB1	1
VTA1	1
DCAF13	1
LDHB	1
CCT7	1
TMSB10	1
MYL6	1
S100A11	1
RACK1	1
RPS6	1
RPS3A	1
RPL15	1
HMGCS1	1
FDFT1	1
CCND2	1
CDC23	1
HSD17B7	1
MVD	1
FAR1	1
PDHB	1
PRKAB1	1
MRPL50	1
AMT	1
NELFCD	1
FBXO3	1
PSMD1	1
PNRC2	1
MRPL19	1
BCAS2	1
APOO	1
ACTL6A	1
NDUFB5	1
BCCIP	1
GPS1	1
THRAP3	1
SRSF7	1
SAP30BP	1
SSR4	1
TSEN2	1
SMC2	1
PMPCA	1
PDCD10	1
BET1L	1
DDX39A	1
CASP3	1
RPS19	1
PITPNB	1
SEC23B	1
PRKAR1A	1
SDHD	1
IDH3A	1
LAP3	1
CDCA7L	1
NUDC	1
RPL4	1
SELENOF	1
PPIA	1
ERH	1
ATP5F1A	1
RPL18A	1
NDUFB9	1
GLI3	1
HSPD1	1
CBS	1
PPP1CA	1
HMBS	1
APEX1	1
ATF1	1
CARMIL1	1
TRAK2	1
SLC34A2	1
MYL9	1
SH3BGRL2	1
PEX13	1
BUB3	1
RFC3	1
CNDP2	1
SCIN	1
UBE2G2	1
STARD4	1
FAM114A2	1
UGP2	1
TARS1	1
ILK	1
NDUFA5	1
UTP11	1
PCNP	1
GALE	1
PHB	1
LSM6	1
WDR83OS	1
SNU13	1
PES1	1
OSTC	1
NOP2	1
MSRB1	1
SNAP23	1
WDR12	1
DDX1	1
RFC5	1
GINS4	1
C18H1orf112	1
C2H5orf51	1
API5	1
WBP11	1
BAG4	1
ARF3	1
SLC38A1	1
SLC16A1	1
ARMT1	1
KNOP1	1
FIBP	1
LEO1	1
COMMD2	1
SSB	1
IFT57	1
NHP2	1
CCDC115	1
ARMC8	1
ABCE1	1
MRPS33	1
AADAT	1
NAA20	1
ATP6V1G1	1
DNAJC19	1
GRHL2	1
LPP	1
RPL5	1
MFN1	1
SCOC	1
EIF3D	1
TPD52L2	1
EIF2A	1
GNG10	1
SMIM30	1
RPS10	1
FABP5	1
TUBA4A	1
STRAP	1
CA13	1
CDC37	1
ETS1	1
CYTL1	1
PNO1	1
RPS15	1
C11H11orf98	1
RPL35	1
MAK16	1
NME1	1
NIP7	1
MYC	1
RPL38	1
SEC61G	1
MEST	1
NNT	1
SGK1	1
ACO1	1
LYAR	1
CTH	1
GK	1
NCOA4	1
NMD3	1
ACTR3	1
GMPR2	1
SNRPA1	1
SNRPB2	1
TIMM22	1
RPL31	1
RPL37	1
LIN7C	1
CHORDC1	1
RNF141	1
RPS16	1
UMPS	1
SEPHS1	1
ECE2	1
CPNE3	1
SRP9	1
ZDHHC6	1
CREB3	1
CNTNAP2	1
ALDH6A1	1
RRN3	1
GLMN	1
FTSJ3	1
INTS11	1
SLTM	1
DNTTIP2	1
THOC1	1
SRRM1	1
NSDHL	1
DHDDS	1
RECQL	1
USP10	1
ARMC9	1
POLD3	1
PKP4	1
GET1	1
ADAM9	1
STT3A	1
CANX	1
AASS	1
SSR1	1
ZMPSTE24	1
MYH10	1
SLF1	1
CLU	1
GOLT1B	1
RANGAP1	1
TARDBP	1
SRSF10	1
RUVBL2	1
PRMT5	1
TRA2B	1
NOP58	1
TIMM44	1
BZW2	1
ANKRD46	1
PDHX	1
HNRNPC	1
PARP2	1
UGDH	1
GET3	1
NVL	1
CSE1L	1
TFAM	1
ERVMER34-1	1
MRPS27	1
ZWILCH	1
DDX23	1
HSPA8	1
FUS	1
RRP12	1
NOLC1	1
SKP2	1
GNL2	1
ORC1	1
PWP2	1
ANP32E	1
SPC24	1
MAT2A	1
SSR3	1
PRCP	1
TNPO1	1
NUP58	1
HMGB3	1
SNRPG	1
EIF3L	1
TOMM22	1
ACP1	1
CCT3	1
PSMB5	1
HMGB1	1
ACTR2	1
GATC	1
BZW1	1
SRSF3	1
SRRT	1
RRP7A	1
MRTO4	1
GTPBP4	1
DDX56	1
DDX21	1
MTAP	1
TOMM20	1
FKBP11	1
DCP1A	1
BCAT1	1
DDX18	1
BEX1	1
LARP4	1
SEPTIN2	1
PWP1	1
PUM3	1
GEMIN5	1
KRT8	1
RPS13	1
RPS17	1
MCM8	1
PRPF38A	1
WDR36	1
ZNF286A	1
UBA52	1
STEAP1	1
PIGW	1
TBC1D15	1
SNRPB	1
DPP3	1
WDR73	1
MORF4L2	1
PTGES3	1
PRIM1	1
RPS11	1
MCM4	1
CDK1	1
DHFR	1
BIRC5	1
PPP2R1B	1
WDR3	1
ARCN1	1
MCM10	1
STIP1	1
EXO1	1
PLK4	1
NUCKS1	1
HMGB2	1
CKAP2	1
MCM3	1
CENPT	1
ORC3	1
SNRPA	1
XRN2	1
C3H4orf46	1
DTL	1
KPNA2	1
WDHD1	1
TMEM184C	1
ANLN	1
KIF23	1
NUF2	1
HMMR	1
SGO2	1
ALG8	1
NEU1	1
PNPT1	1
RARS1	1
PCLAF	1
MAN1B1	1
USP14	1
CGN	1
GPD2	1
BCL10	1
SELENOT	1
RPS21	1
ZFP36L1	1
CLINT1	1
DLAT	1
SLC29A1	1
CDC6	1
EEF1AKNMT	1
CD151	1
PLOD2	1
TRIM2	1
AHNAK	1
COL4A1	1
LAMA1	1
CCDC47	1
TMEM109	1
B2M	1
ATP6AP2	1
ORMDL1	1
WDR75	1
NCL	1
FAU	1
EIF4G2	1
SYNCRIP	1
NOP56	1
WDR77	1
POLR2L	1
LTV1	1
RCC1	1
OTUB1	1
NOP16	1
PROSER1	1
DCTPP1	1
DKC1	1
PSMB4	1
G3BP1	1
PRMT1	1
PSMD14	1
DENND10	1
TCP1	1
MKKS	1
SNRPF	1
MRPL18	1
PSMA2	1
SLC25A5	1
COPS3	1
CENPW	1
PCNA	1
ZWINT	1
CEP43	1
CKS1B	1
MCM5	1
SMU1	1
ECHS1	1
UBE2V1	1
SF3A3	1
BMS1	1
XRCC5	1
CHTOP	1
EIF1AX	1
UBR7	1
PCDH18	1
SHMT2	1
MID1	1
GALNT14	1
CSRP1	1
ANXA3	1
ACSL1	1
ST3GAL1	1
HSPB8	1
SLC6A15	1
GNAI1	1
PLIN2	1
BTBD3	1
POMP	1
PRR13	1
GPN1	1
CAPZA2	1
NDUFB10	1
SRI	1
DENR	1
CCND1	1
LSM12	1
EEF1D	1
GLIPR2	1
AP1S2	1
REXO2	1
UCK2	1
TIMM23B	1
PPID	1
PPAT	1
STYX	1
NOC2L	1
PSAT1	1
UHRF1	1
ARHGAP29	1
MTFP1	1
SFXN1	1
GRWD1	1
AKR1B1	1
MDK	1
OTUD6B	1
DCK	1
STOML2	1
RAB5A	1
CDCA7	1
SEPTIN6	1
RPE	1
ENO3	1
ABCD3	1
ARL6IP5	1
MTMR9	1
NDRG2	1
ADK	1
DEDD	1
TAGLN2	1
PNP	1
RPL36	1
SNRPD2	1
PTPN2	1
GFUS	1
LAS1L	1
KRBOX1	1
DDX25	1
PEG3	1
CLIC1	1
PSME2	1
ARL3	1
DIO2	1
ZBTB44	1
CRABP1	1
ELL2	1
PSME1	1
CRIP2	1
PYDC1	1
RPL22L1	1
CRYBG1	1
RRAGD	1
SPRY4	1
S100A6	1
SFRP2	1
PCP4	1
ACOT7	1
TES	1
CCT6A	1
IGF2BP1	1
PAPOLA	1
CFAP298	1
SMARCA1	1
RAB10	1
ASNS	1
CCT4	1
KDR	1
LRRC59	1
CNOT8	1
TEAD4	1
PLIN3	1
PDP1	1
PLPBP	1
COL1A1	1
CYB561	1
KIF1A	1
LRRN1	1
SORL1	1
GLS	1
CYYR1	1
FLT1	1
PGAP1	1
STT3B	1
CGRRF1	1
CENPX	1
TMEM237	1
FGFR1	1
OLFM2	1
DDR1	1
SLC4A7	1
CCDC186	1
PODXL	1
STEAP2	1
GPC4	1
ERBB2	1
FEM1B	1
ROR1	1
PTPN13	1
CISD2	1
ZSCAN10	1
PANK3	1
ZDHHC20	1
ETS2	1
TMEM59L	1
CXADR	1
CHAF1A	1
CAVIN1	1
STAT1	1
VAT1L	1
GLUL	1
GNL1	1
MAD2L2	1
ZIC3	1
PDGFA	1
MPDU1	1
MATR3	1
TTC38	1
RBMX	1
CTNNBL1	1
HNRNPA2B1	1
URB2	1
DDX19A	1
PPP4R3B	1
DDX42	1
RPS27A	1
RPS12	1
GFPT1	1
GART	1
DCAF12	1
SPARC	1
SND1	1
NUP62	1
COPS2	1
DDB1	1
LIG1	1
GLYR1	1
AARS1	1
AAMP	1
BEX5	1
LIN28B	1
OPA1	1
TBRG4	1
PAFAH1B1	1
HNRNPR	1
PHGDH	1
TXN2	1
CARS1	1
ARF1	1
MRPL15	1
MED28	1
HNRNPA3	1
CCT8	1
TOMM6	1
CCT5	1
RSL1D1	1
XRCC6	1
SNX17	1
HNRNPF	1
MRPL47	1
NARS1	1
SF3B4	1
SF3B3	1
SF3B1	1
WWP2	1
CLTC	1
FTO	1
AP2B1	1
MMS19	1
XPO1	1
ZNF207	1
FASTKD2	1
ZNF24	1
MCM3AP	1
DDX11	1
VPS52	1
DYNLL1	1
PPIL1	1
DHX15	1
RPL28	1
MAPK1IP1L	1
CUL7	1
OCIAD1	1
POLR2B	1
KRTCAP2	1
NUP205	1
SRSF1	1
MCM7	1
RPLP1	1
RPL12	1
DHX9	1
STAG1	1
GDI2	1
AZIN1	1
ABAT	1
SOCS4	1
FUNDC2	1
HNRNPH1	1
DNAJA1	1
ARMC1	1
CTNND1	1
PIP5K1A	1
RPL21	1
RPL22	1
NACA	1
RPS23	1
RPL10A	1
RPS8	1
HNRNPA1	1
RPL10	1
RPL41	1
SKP1	1
KARS1	1
ATP5MC2	1
DMAC2	1
CAPZA1	1
PRRC1	1
EFTUD2	1
ABCF1	1
NUDT21	1
PAPSS1	1
ATP6V1A	1
IPO7	1
RPS26	1
GNL3	1
RPS15A	1
RPS24	1
EEF1G	1
RPSA	1
RPL39	1
FXR1	1
SRP72	1
CHMP1B	1
IBTK	1
SPIN4	1
POLR1A	1
RBM19	1
TMEM168	1
RO60	1
PHF6	1
UTP20	1
STMP1	1
PHF5A	1
LTA4H	1
SS18	1
CASP2	1
NSL1	1
MTREX	1
PSMC4	1
CPSF3	1
NUP54	1
MAGOHB	1
SEC31A	1
TUBA1C	1
TMEM258	1
RPS20	1
DNMBP	1
CS	1
ESD	1
COPB2	1
VBP1	1
NR6A1	1
PPWD1	1
LANCL1	1
NOL11	1
SUPT16H	1
FKBP3	1
ODF2	1
ANAPC5	1
POLA1	1
GIGYF2	1
SEMA6D	1
AP3B1	1
PGM3	1
UBE2A	1
TRMT112	1
HBS1L	1
CDC42	1
PAICS	1
CSNK2A1	1
CIPC	1
BLVRB	1
ENY2	1
NUDT5	1
ELOF1	1
UBTF	1
BCAT2	1
TSR1	1
WRAP53	1
PLRG1	1
POLR2F	1
UXT	1
ATP5MC3	1
RPS5	1
CSNK2B	1
CNN2	1
AMD1	1
ADSL	1
EIF3K	1
RPL17	1
RPS9	1
RPL30	1
EEF1B2	1
BTF3	1
RPL19	1
RPS7	1
RPS29	1
TOMM7	1
UBAP2L	1
EEF1E1	1
MRPS35	1
MRPL3	1
RPL14	1
RPL18	1
SNRNP40	1
PSMC5	1
DPH3	1
C11H11orf58	1
PFDN1	1
DNAJC9	1
RNF5	1
DPCD	1
SNX6	1
RARS2	1
AAGAB	1
MEA1	1
CBX5	1
NELFE	1
RPL32	1
PFDN4	1
ATIC	1
TMEM167A	1
DDX39B	1
EIF2S3	1
CLNS1A	1
GINS1	1
VPS25	1
SPART	1
ARL1	1
STOM	1
ZW10	1
AKR1B10	1
IPO5	1
DDIAS	1
ID2	1
AZI2	1
CA11	1
UCP2	1
CFDP1	1
ASS1	1
UBA6	1
DPYSL2	1
GLDC	1
KIF3A	1
ORAI2	1
CHD8	1
SUPT20H	1
SP4	1
CMTR1	1
RBPMS	1
ADAM19	1
DDIT4L	1
RFX2	1
PHACTR2	1
SRP14	1
SPIN1	1
LARP1	1
SEM1	1
GNL3L	1
TFDP2	1
CTBP2	1
DNAJB6	1
THBS1	1
DCLK1	1
GGT1	1
A4GALT	1
MICAL1	1
TET1	1
DTX2	1
PLSCR1	1
PLAT	1
SEMA3C	1
BCL2L1	1
NPTN	1
SLC23A2	1
TIA1	1
GNPAT	1
RNF20	1
U2SURP	1
PIMREG	1
IPO9	1
ATP6V0A1	1
PRKCSH	1
CCPG1	1
JADE1	1
N4BP2L2	1
MEAF6	1
DPPA4	1
ANXA7	1
GMPPA	1
BUD23	1
MME	1
SPAG6	1
SMYD5	1
AQR	1
TTI1	1
NDUFS1	1
RCBTB1	1
HMGN3	1
CBY1	1
NID1	1
DHRS3	1
SHISA2	1
MRPS5	1
CCN1	1
TENM4	1
NLRP7	1
CAMKV	1
EHMT2	1
ROGDI	1
BDP1	1
NSRP1	1
HSP90AA1	1
RPL37A	1
CHD4	1
QKI	1
THADA	1
LARS2	1
THBS3	1
TYW1	1
PIK3C2A	1
PSENEN	1
ERLIN2	1
VMA21	1
ORMDL3	1
DDX3X	1
INTS3	1
PEG10	1
CD2BP2	1
SALL2	1
NASP	1
CAD	1
METTL3	1
MEGF10	1
CHL1	1
GLT8D2	1
IFT74	1
USP9X	1
PRICKLE1	1
TTC14	1
LARP7	1
FUBP1	1
APH1B	1
PCM1	1
LSG1	1
TMEM67	1
LTBP1	1
LMBRD1	1
EPRS1	1
TERF1	1
APBB1	1
CFAP91	1
CPT1C	1
SRBD1	1
INTS2	1
ZMYM2	1
FUT10	1
KIDINS220	1
TOGARAM1	1
MYSM1	1
PRPF4B	1
HYDIN	1
SLC17A8	1
ALG6	1
CEP162	1
PLCH1	1
VEZT	1
NUFIP2	1
FAT1	1
AKAP14	1
CFAP69	1
PAMR1	1
WDR35	1
NLGN3	1
TRPC4	1
ASCC3	1
LRRIQ1	1
SYT11	1
NLGN4X	1
JAKMIP2	1
THY1	1
TNRC6A	1
HELLS	1
MDN1	1
TLK1	1
TEX9	1
PSMG2	1
PLP2	1
MORC2	1
INSR	1
PCDH1	1
B4GALT4	1
ZNF445	1
ELOVL6	1
SAR1B	1
LEPROT	1
NOC3L	1
GALNT7	1
GALNT4	1
AGPAT5	1
GJA1	1
SPCS3	1
C5H17orf62	1
TFPI2	1
FKBP10	1
CD164	1
SLC39A1	1
SLC35F6	1
LEPROTL1	1
AXL	1
TNFRSF19	1
FSTL1	1
CADM1	1
VKORC1	1
TPCN1	1
SLC35B4	1
MYH9	1
TMEM33	1
VCL	1
PPP1R15B	1
MRFAP1	1
SEC14L1	1
APEH	1
CDH6	1
ANAPC1	1
SYMPK	1
XPO5	1
COL6A3	1
SCRN1	1
MYO1C	1
QPRT	1
CD48	1
IGSF1	1
MAPRE2	1
PFDN6	1
GULP1	1
PPP1R17	1
SERPINB9	1
CCDC28B	1
DNMT3B	1
SYNJ2BP	1
ZIC5	1
CFAP45	1
PNMA2	1
MGST1	1
C15H3orf14	1
PPIL4	1
POLR1C	1
POLR3G	1
GPN3	1
TNPO3	1
LDAH	1
SZRD1	1
GSTP1	1
SINHCAF	1
TGIF1	1
TAGLN	1
ACTA1	1
GLOD4	1
CTNNA1	1
GSKIP	1
FZD7	1
TRIM22	1
CD82	1
CD177	1
TDGF1	1
ZFP42	1
FAM178B	1
GADL1	1
CAV1	1
JARID2	1
DNMT3A	1
SKIL	1
MLF1	1
HLTF	1
PFKM	1
PYY	1
CFAP44	1
GPR160	1
SOX2	1
IFT140	1
USP44	1
CXCL12	1
SEZ6L2	1
DNALI1	1
FXYD6	1
IFT22	1
DHDH	1
CDKL2	1
EIF1B	1
NPM3	1
TEX10	1
EXOC7	1
RGS5	1
IPO8	1
SAMM50	1
WDR46	1
BBS7	1
DNA2	1
TPP2	1
NUP160	1
XPO4	1
TCOF1	1
UTP15	1
SET	1
UBE2K	1
KPNA6	1
UBE4B	1
C22H19orf54	1
APOC1	1
IARS1	1
DOCK1	1
SHC1	1
CEBPZ	1
KYAT3	1
CNOT10	1
MIEF1	1
IMPACT	1
GPAT3	1
FAM135A	1
HS2ST1	1
PLD2	1
SLC39A10	1
FRAS1	1
SFRP1	1
TMEM50A	1
CLCN4	1
SYNPR	1
IQGAP1	1
MARS1	1
PDGFRB	1
PTPRK	1
PFAS	1
CLDN12	1
GPX8	1
RDH11	1
EXTL2	1
ACLY	1
ANKRD27	1
TMTC3	1
SOSTDC1	1
LARS1	1
HEATR1	1
SLC13A5	1
CUTA	1
CPSF6	1
CSTF3	1
ZRANB2	1
RAD54L	1
NUP133	1
CMTM6	1
NUP155	1
AGTRAP	1
SIKE1	1
ATP6V1G2	1
CCAR1	1
PC	1
SLC7A3	1
SLC38A4	1
RBM14	1
IQGAP3	1
CLDN7	1
XPR1	1
ZIK1	1
PSRC1	1
NNAT	1
TF	1
TMEM231	1
MRPL37	1
ILF3	1
PPAN	1
ANO6	1
FADS2	1
SLC4A2	1
CREB3L2	1
TLN1	1
NOL6	1
CASC3	1
FOXH1	1
CTNNB1	1
FARSA	1
PLXNB2	1
F2RL1	1
NAA40	1
PNKP	1
DNAJC13	1
FNBP1L	1
NUP98	1
NAA15	1
FLNA	1
LASP1	1
ASH2L	1
THUMPD1	1
NFXL1	1
CCNL1	1
DBN1	1
WBP1	1
DCAF7	1
RSF1	1
MFAP2	1
OGA	1
RBL1	1
ATXN7L3B	1
SNAP29	1
DIS3	1
SLC30A9	1
VPS18	1
SHKBP1	1
STAU1	1
MAPK6	1
BCL2L13	1
SELENOS	1
ALG12	1
SRPRA	1
ZDHHC5	1
DUS2	1
GTF3C1	1
TSC2	1
SLC25A6	1
DHX16	1
TTLL4	1
YTHDF3	1
TUFM	1
PPP1R2	1
IPO4	1
SRSF6	1
ACIN1	1
AMPD2	1
MYBBP1A	1
PNPLA6	1
SQSTM1	1
JUP	1
INTS1	1
RPN1	1
TFRC	1
ADAM10	1
HMGCR	1
CYP51A1	1
SCD	1
ALDH18A1	1
GAPVD1	1
TMEM97	1
SMPD4	1
NRAS	1
FLNB	1
SENP2	1
ATR	1
HSPA13	1
NEMP1	1
TMEM138	1
SEC11A	1
SLC39A9	1
LCLAT1	1
SLC26A2	1
FOLR1	1
SPCS1	1
ZNF460	1
SC5D	1
F11R	1
VTN	1
NAA25	1
SERINC1	1
SLC30A7	1
CALU	1
SSR2	1
CDH3	1
TOR1AIP1	1
CA14	1
COL11A1	1
USO1	1
MFAP3	1
SLC37A4	1
COL4A6	1
PMEL	1
WASHC4	1
DNASE2	1
SEC61A2	1
PIGS	1
NPY1R	1
TTC21B	1
PCCA	1
ERGIC2	1
DDX46	1
ZNF260	1
MESD	1
TMX1	1
TMEM230	1
GFM1	1
SEC23A	1
SLC5A6	1
CTSA	1
RANBP2	1
TMEM39A	1
SRPRB	1
FAF2	1
POGLUT1	1
TXNDC15	1
DPAGT1	1
TCTN3	1
SLC38A2	1
CNPY2	1
TMEM43	1
SEC61A1	1
VMP1	1
MCFD2	1
YIPF5	1
IFT80	1
CSDE1	1
PRPSAP2	1
HADHA	1
NCAPD3	1
BLM	1
B9D1	1
FANCD2	1
ECT2	1
NCAPG2	1
KIF2C	1
CKAP5	1
KNTC1	1
KIFC1	1
STIL	1
ATAD5	1
BRCA1	1
MKI67	1
UBAP2	1
CUL4B	1
ERCC6L	1
TCTN2	1
TMEM209	1
UFL1	1
EMC1	1
C2H5orf15	1
BRD8	1
SLC11A2	1
NCSTN	1
GANAB	1
RPN2	1
TM9SF4	1
DNAJC10	1
MAGT1	1
C1GALT1C1	1
TMED10	1
PIGK	1
TMEM38B	1
UHRF1BP1L	1
TSPAN6	1
ZMYM1	1
NUCB1	1
NDC1	1
TM2D2	1
ESYT1	1
ATAD1	1
ABCC5	1
PTCD3	1
ZNF669	1
TECR	1
PIK3R4	1
SLC38A9	1
SUPV3L1	1
CLDN6	1
CYB5R1	1
BCAP31	1
CDS2	1
TMCO1	1
AUP1	1
SPCS2	1
UBAC2	1
TUBGCP5	1
TMTC4	1
GGCX	1
NAP1L4	1
PDIA3	1
RNF26	1
CENPH	1
PRCC	1
RBBP7	1
CDC20	1
CDCA2	1
CGNL1	1
DNMT1	1
EML4	1
ZNF326	1
SPDL1	1
GABPA	1
PPIB	1
CTSL	1
SCPEP1	1
HACD2	1
DPY19L4	1
LDLRAD3	1
ATL2	1
ARL6IP6	1
BRCA2	1
ATP2C1	1
IFNGR1	1
ZDHHC13	1
CENPE	1
TRIM59	1
ARL6IP1	1
TOP2A	1
BUB1B	1
ADAR	1
ANKFY1	1
DLGAP5	1
KIF20B	1
BORA	1
TRAP1	1
GOT1	1
RRM1	1
NCAPD2	1
KIF4A	1
TPX2	1
NDC80	1
CTDSPL2	1
SPAG5	1
PRC1	1
CDCA8	1
CETN3	1
COPB1	1
MTMR2	1
TBP	1
IVNS1ABP	1
RAN	1
ILF2	1
PSAP	1
HSP90B1	1
DAD1	1
BUB1	1
KIF18A	1
TUBB4B	1
RND3	1
ATP5F1B	1
CD63	1
CLSPN	1
CHAF1B	1
HJURP	1
DERL2	1
CDCA3	1
PLK1	1
SKA3	1
MELK	1
KIF20A	1
KIF22	1
NCAPH	1
NPM1	1
GSTM3	1
SPC25	1
AURKB	1
PSMB3	1
MAD2L1	1
UBE2L6	1
SAR1A	1
ARL6	1
PLEKHB2	1
ARRDC3	1
VPS41	1
ITCH	1
S100PBP	1
ZNF317	1
VPS8	1
RSRC2	1
PARN	1
MTF2	1
IGF2BP3	1
SMIM7	1
ZFP62	1
ANKRD50	1
DCAF8	1
ZCRB1	1
WDR54	1
EDRF1	1
NRDC	1
FBXO42	1
TSC1	1
LAMB2	1
GM2A	1
DMTF1	1
PIGU	1
EMP2	1
TEP1	1
DRAM2	1
KIAA0100	1
TMEM41B	1
HNRNPDL	1
DDX10	1
RFWD3	1
C5H17orf80	1
ANAPC7	1
R3HDM1	1
KIFBP	1
ELP1	1
CDK5RAP2	1
PREPL	1
ZNF532	1
BCOR	1
NBR1	1
TOPBP1	1
MTOR	1
PITRM1	1
NYNRIN	1
RPGRIP1L	1
QSER1	1
TOX4	1
CHEK2	1
MNS1	1
RBM39	1
RPAP1	1
TPP1	1
TP53BP1	1
RFC1	1
PNN	1
YY1AP1	1
CYTB	1
GON4L	1
AGO2	1
DYNC1LI2	1
ENAH	1
NIPBL	1
CWC27	1
METTL4	1
VRK3	1
SEC23IP	1
PGD	1
XRCC1	1
CCNT2	1
CLUAP1	1
C2CD5	1
ARHGAP5	1
PPIP5K2	1
FOXRED1	1
IST1	1
PDS5B	1
CSRP2	1
CIRBP	1
LIAS	1
DROSHA	1
UBC	1
NFX1	1
ATG13	1
NSA2	1
UBLCP1	1
MIER3	1
UBXN4	1
SDAD1	1
LRBA	1
PIK3C3	1
TAF1	1
WDR19	1
NFRKB	1
RICTOR	1
EPS15	1
SLU7	1
UCHL1	1
DCTN2	1
DDX24	1
TFB2M	1
PDCD11	1
PRPF6	1
QARS1	1
SUPT6H	1
SUPT5H	1
PPP1R10	1
MDC1	1
NAT10	1
AP1G1	1
EIF4A3	1
MYCBP	1
SNRNP27	1
POLDIP3	1
RNMT	1
NCBP2	1
DHX40	1
NFYB	1
G3BP2	1
POLB	1
MARCHF8	1
FAM53C	1
BAG6	1
UBA1	1
MAP4	1
SEC24A	1
EEF2	1
KAT7	1
LRP1	1
TTC17	1
PLXNB1	1
HSD17B12	1
POLR2A	1
SGPL1	1
LIG3	1
YIPF3	1
PATJ	1
SLC38A7	1
VPS13D	1
NUCB2	1
FANCA	1
PLTP	1
MIA3	1
G6PC3	1
RESF1	1
WDR11	1
DHX29	1
SNRPN	1
OGT	1
TSPYL4	1
NXF1	1
PRPF8	1
SNRNP200	1
RBM3	1
NUP214	1
DNM1L	1
ACACA	1
MARCHF7	1
ATP6V1C1	1
CNOT1	1
TXLNA	1
GCN1	1
PDPR	1
SPTAN1	1
ERBB3	1
TMEM106B	1
CSNK1A1	1
UBE2L3	1
SYF2	1
PRPF40A	1
DCUN1D3	1
GTF3C2	1
HADHB	1
VPS35	1
AP3M1	1
WDR6	1
PPP2R1A	1
TXNRD1	1
DIABLO	1
UBL7	1
GABARAPL1	1
DPH5	1
NDUFA3	1
SH3BGRL	1
TCEAL4	1
TAX1BP1	1
PDCD4	1
BBS1	1
CETN2	1
TP53	1
ACAD11	1
LZTFL1	1
TCF7L1	1
TUBB2B	1
OTX2	1
RPGR	1
PHC1	1
C2H5orf24	1
ELP2	1
EIF4A2	1
SMARCAD1	1
NOL8	1
PNISR	1
FANCL	1
BSCL2	1
HACL1	1
OFD1	1
PLEKHA5	1
BAZ2B	1
HSDL1	1
CECR2	1
SETDB2	1
ERMARD	1
ABCC1	1
CYP39A1	1
SEMA4D	1
KANSL1	1
GCC2	1
LUC7L3	1
CEP295	1
ZFC3H1	1
CCDC90B	1
SPICE1	1
ERP29	1
GLMP	1
GOLGB1	1
PRPF39	1
TAF1D	1
HEPH	1
CLK1	1
UBE3B	1
CEP192	1
PAN2	1
TAF1B	1
NBEA	1
SMIM14	1
CIR1	1
DHRS1	1
ZCCHC7	1
ARMCX2	1
PDRG1	1
TADA2A	1
MGME1	1
NEK3	1
PIK3R3	1
FIS1	1
ARL14EP	1
IGBP1	1
POU5F1	1
WDR48	1
TRUB2	1
HEATR5A	1
PTPRU	1
DCTN1	1
BAZ2A	1
MRTFB	1
ZNF217	1
DPYSL3	1
KDM4A	1
GOLPH3L	1
GPATCH2L	1
ARFGAP3	1
GPI	1
GARRE1	1
STK4	1
CFAP36	1
ESRP1	1
RAB3GAP1	1
SCAMP1	1
ASAH1	1
OS9	1
PHF20	1
SLC39A11	1
FGFR4	1
SERPING1	1
CCER2	1
SETX	1
RBM6	1
RAB8B	1
ZNF292	1
CLASP1	1
RETREG3	1
PLD3	1
SLC35A1	1
SUN1	1
TRIP11	1
LMLN	1
DYNC1H1	1
GRN	1
FAM234A	1
ATRX	1
FAM160A2	1
PHIP	1
CHD6	1
WDR59	1
SRSF5	1
DDX5	1
RBM25	1
HUWE1	1
TRA2A	1
RBM5	1
PPIG	1
CEP290	1
SREK1	1
MED23	1
MIER1	1
MGA	1
CTSV	1
SLC35A2	1
PSEN1	1
ERGIC3	1
B4GALT3	1
TMEM199	1
VIRMA	1
GBF1	1
BTN2A1	1
PALB2	1
UBR1	1
NPC2	1
CTSC	1
DIPK1A	1
PRDM14	1
TXLNG	1
CYFIP2	1
NIT2	1
MARF1	1
MORC3	1
BBS4	1
ELF3	1
NSD1	1
ATP1B2	1
JMJD1C	1
RNF213	1
SLC31A1	1
CNTN4	1
L3MBTL2	1
KANK1	1
TRPM7	1
SPTBN1	1
SLC39A6	1
JAM3	1
MACF1	1
GPR108	1
ELOVL2	1
ATP13A3	1
TRRAP	1
ZNF670	1
WDR33	1
ACADS	1
SNX14	1
UNC50	1
CASP8AP2	1
UBR4	1
ESF1	1
BOD1L1	1
ACAD9	1
CCDC88A	1
SLC7A6	1
CEP135	1
ETNK1	1
TMEM181	1
TMEM9	1
RSRP1	1
LRIG2	1
LAMP2	1
CLCC1	1
TMED5	1
M6PR	1
JAGN1	1
MMUT	1
SEL1L	1
MPHOSPH9	1
PLS3	1
ATF6B	1
SERINC3	1
RNF167	1
HYOU1	1
MBTPS1	1
DERL1	1
PLOD1	1
RAD17	1
COL4A5	1
G2E3	1
ADAM17	1
TMEM87A	1
LMAN1	1
PIGT	1
TSPYL1	1
MSMO1	1
LDLR	1
IPO11	1
GLA	1
SYPL1	1
LIMA1	1
SDC4	1
TMX2	1
NUP85	1
DCAF16	1
MIA2	1
LIPG	1
LPCAT3	1
PPT1	1
LMAN2L	1
TIMELESS	1
SMC1A	1
SLC30A6	1
TGFBR3	1
CD74	1
TAC3	1
BTG2	1
LRRCC1	1
FUT8	1
TCAF1	1
UGT8	1
ENO1	1
AFAP1L2	1
MECR	1
CDYL	1
DERA	1
ZC2HC1A	1
PRDX6	1
SOD1	1
CFL2	1
TERB2	1
ARL4A	1
GSN	1
PTN	1
RPL24	1
RARG	1
THEMIS2	1
BEX3	1
APELA	1
UBL5	1
COMMD6	1
HDAC1	1
GMFB	1
METAP1	1
SDCBP	1
ECD	1
DARS1	1
CAMK2D	1
SF3B2	1
PAWR	1
AGO1	1
ENO2	1
SSBP2	1
IQCB1	1
PDLIM5	1
BNIP3L	1
OAZ2	1
RPL23	1
GBE1	1
SNX5	1
PPP2R2A	1
RPL27	1
FKBP8	1
BEND4	1
PGK1	1
GNPDA1	1
SERPINF1	1
PPM1F	1
PPME1	1
RNF181	1
ABLIM1	1
MRPL39	1
EIF4E2	1
GOSR2	1
ROMO1	1
C10H14orf119	1
PKM	1
MIF	1
FAM162A	1
CRISPLD1	1
PAK1	1
GGH	1
SEC24D	1
PGAM1	1
HINT1	1
GALNT6	1
CAJA-DRA	1
RIOK3	1
EXOSC9	1
INTS13	1
PEX19	1
LAMTOR3	1
LAMTOR2	1
MED29	1
SNW1	1
ZCCHC17	1
MRPL42	1
NUDCD3	1
SLIRP	1
TRAPPC2L	1
NDUFB7	1
OARD1	1
MRPS7	1
CD24	1
NDUFB4	1
MRPL1	1
NDUFC1	1
DYNLRB1	1
PSMC6	1
LSM5	1
SNRPE	1
NAP1L1	1
NDUFS6	1
RNF7	1
NSFL1C	1
BABAM1	1
PDZD11	1
ATP5PD	1
DYNLT1	1
MAX	1
TMSB15B	1
SCP2	1
AP3S2	1
SNRPD3	1
MRPS21	1
RPL6	1
EIF3I	1
RPL26	1
GNG5	1
RPS4X	1
RPL34	1
RPL7L1	1
ZC3H15	1
DNAJC7	1
SELENOH	1
ID3	1
ATF4	1
MRPL11	1
VRTN	1
WDR1	1
RAB7A	1
DNAJA2	1
METAP2	1
ARPC4	1
CCT2	1
RUVBL1	1
LLPH	1
FAM98A	1
HAX1	1
GLO1	1
MRPL30	1
RPF1	1
[truncated: 2,976 more rows]
